# Supplementary material for: Sugarcane transcriptome analysis in response to infection caused by Acidovorax avenae subsp. avenae
Source: PLoS One. 2016 Dec 9;11(12):e0166473. doi: 10.1371/journal.pone.0166473 (PMC5147822; doi:10.1371/journal.pone.0166473)
Supplement: S2 Table — The transcripts were processed for sequence similarity searches against reference monocot proteins and gene families (GF) in TRAPID. (XLSX) [file pone.0166473.s002.xlsx]

## Sheet: S2 Table
	S2 Table. List of the 798 differentially regulated transcripts with number reads, RPKM, results of Fisher exact test and Log2 Fold Change. The transcripts were processed for sequence similarity searches against reference monocot proteins and gene families (GF) in TRAPID.
	ID Reference Transcriptome	Number of reads					Read Per Million Per Kilo Base (RPKM)					Fisher exact test			Log2 Fold Change			Functional annotation online TRAPID tool
		Replicate 1		Replicate 2			Replicate 1		Replicate 2			Replicate 1	Replicate 2
		Control	Infected	Control	Infected		Control	Infected	Control	Infected		Control vs Infeceted	Control vs Infeceted		Replicate 1	Replicate 2		Orthologous	TRAPID gene family	Protein domain annotation
	Locus_1002_Transcript_4_5	11	12	6	24		5.74704	18.8005	3.49266	15.28					1.70988	2.12925		SB07G001090	3587_HOM000186	Core-2/I-Branching enzyme
	Locus_10023_Transcript_4_5	105	59	185	224		36.0776	60.7907	70.8228	93.7901					0.752748	0.405221		BD3G35820	3587_HOM000336	Trehalose-phosphatase;Glycosyl transferase, family 20; HAD-superfamily hydrolase, subfamily IIB
	Locus_10039_Transcript_1_2	2	8	3	18		2.3334	27.9889	3.89973	25.5913					3.58435	2.71421		SB09G018560	3587_HOM006358	Cyclin-like F-box
	Locus_10066_Transcript_3_3	0	6	1	10		0.001	46.9589	2.90792	31.8046					15.5191	3.45118		null		Unavailable
	Locus_1007_Transcript_2_6	217	46	98	58		170.099	108.127	85.5895	55.4026					-0.653639	-0.627481		SB02G042050	3587_HOM001471	Translation elongation factor EF1B/ribosomal protein S6;
	Locus_1016_Transcript_2_2	106	64	31	65		215.77	390.663	70.3072	161.235					0.85643	1.19742		SB03G005720	3587_HOM000269	Histone-fold;Histone H2B; Histone core
	Locus_1023_Transcript_1_7	118	64	75	104		91.6264	149.024	64.8863	98.4085					0.701707	0.600868		SB02G010910	3587_HOM000005	Cytochrome P450;Cytochrome P450, E-class, group I; Cytochrome P450, conserved site
	Locus_1023_Transcript_6_7	107	74	76	109		69.3461	143.816	54.8789	86.0846					1.05234	0.649504		SB02G010910	3587_HOM000005	Cytochrome P450;Cytochrome P450, E-class, group I; Cytochrome P450, conserved site
	Locus_10238_Transcript_1_3	133	25	73	32		59.3266	33.4407	36.2806	17.3944					-0.827076	-1.06058		SB04G008150	3587_HOM115260	Major facilitator superfamily, general substrate transporter;Sugar/inositol transporter
	Locus_10295_Transcript_1_2	13	15	33	71		33.3273	115.315	94.2593	221.807					1.7908	1.2346		SB02G033400	3587_HOM000485	Metallophosphoesterase;Purple acid phosphatase-like, N-terminal
	Locus_1041_Transcript_1_7	41	97	37	115		42.3252	300.278	42.5569	144.668					2.82671	1.76528		SB06G033080	3587_HOM000886	Unavailable
	Locus_1041_Transcript_2_7	38	69	20	110		43.5869	237.333	25.5597	153.754					2.44495	2.58868		SB06G033080	3587_HOM000886	Unavailable
	Locus_1041_Transcript_3_7	46	115	28	113		47.6143	356.956	32.2917	142.534					2.90628	2.14207		SB06G033080	3587_HOM000886	Unavailable
	Locus_1041_Transcript_4_7	33	56	27	73		49.105	249.883	44.7641	132.372					2.34731	1.56418		SB06G033080	3587_HOM000886	Unavailable
	Locus_1041_Transcript_5_7	23	50	15	69		71.2939	464.763	51.8047	260.636					2.70464	2.33088		null		Unavailable
	Locus_1041_Transcript_6_7	78	88	42	116		114.592	387.684	68.7482	207.672					1.75838	1.59491		SB06G033080	3587_HOM000886	Unavailable
	Locus_1041_Transcript_7_7	38	78	41	121		39.2633	241.677	47.1998	152.352					2.62183	1.69056		SB06G033080	3587_HOM000886	Unavailable
	Locus_10533_Transcript_1_2	185	33	165	97		106.311	56.8664	105.643	67.9263					-0.902637	-0.637162		SB02G037830	3587_HOM001255	Anticodon-binding;Aminoacyl-tRNA synthetase, class II, conserved domain
	Locus_10633_Transcript_2_2	0	5	3	16		0.001	22.6314	5.04521	29.4297					14.466	2.54428		SB10G020870	3587_HOM007749	VQ
	Locus_10655_Transcript_1_2	64	63	83	141		36.8327	108.725	53.2212	98.8856					1.56163	0.893759		ZM05G29860	3587_HOM000445	AtcwINV2 (Arabidopsis thaliana cell wall invertase 2); hydrolase, hydrolyzing O-glycosyl compounds
	Locus_1078_Transcript_1_2	0	5	4	18		0.001	24.7299	7.3507	36.1783					14.594	2.29917		ZM07G26700	3587_HOM001475	B12D
	Locus_1079_Transcript_1_1	189	40	358	143		113.459	72.0069	239.449	104.61					-0.655964	-1.1947		ZM04G41680	3587_HOM000425	Chaperonin Cpn60;Chaperonin Cpn60/TCP-1
	Locus_10812_Transcript_3_3	176	23	85	48		254.364	99.68	136.872	84.5367					-1.35152	-0.695181		SB10G027590	3587_HOM004649	Translation protein SH3-like;KOW; Ribosomal protein L24/L26, conserved site
	Locus_10821_Transcript_1_3	10	17	15	63		5.14782	26.2427	8.60336	39.5207					2.34989	2.19964		SB02G031140	3587_HOM000161	Major facilitator superfamily, general substrate transporter
	Locus_10821_Transcript_2_3	11	21	12	49		5.6727	32.4753	6.89497	30.7932					2.51724	2.15899		SB02G031140	3587_HOM000161	Major facilitator superfamily, general substrate transporter
	Locus_10821_Transcript_3_3	11	22	21	66		5.68031	34.0674	12.0824	41.5321					2.58435	1.78132		SB02G031140	3587_HOM000161	Major facilitator superfamily, general substrate transporter
	Locus_10822_Transcript_3_5	93	9	151	71		867.15	251.647	1568.71	806.735					-1.78488	-0.95941		null		Unavailable
	Locus_1084_Transcript_1_10	50	33	15	53		55.0048	108.863	18.3855	71.0505					0.984888	1.95028		ZM10G19680	3587_HOM000697	Ribosomal protein L23/L15e, core;Nucleotide-binding, alpha-beta plait; Ribosomal protein L23/L25, N-terminal
	Locus_1084_Transcript_8_10	75	47	31	100		75.7998	142.443	34.9078	123.16					0.910121	1.81891		ZM10G19680	3587_HOM000697	Ribosomal protein L23/L15e, core;Nucleotide-binding, alpha-beta plait; Ribosomal protein L23/L25, N-terminal
	Locus_1084_Transcript_9_10	82	48	38	88		113.952	200.027	58.8365	149.023					0.811761	1.34075		ZM06G18710	3587_HOM000697	Ribosomal protein L23/L15e, core;Nucleotide-binding, alpha-beta plait; Ribosomal protein L23/L25, N-terminal
	Locus_10901_Transcript_4_4	1	10	1	9		3.46168	103.806	3.85692	37.9656					4.90628	3.29917		null		Unavailable
	Locus_10954_Transcript_1_5	53	5	38	8		237.514	67.1924	189.736	43.6882					-1.82164	-2.11868		ZM09G23450	3587_HOM000755	Thioredoxin-like fold;Glutathione S-transferase, C-terminal-like; Glutathione S-transferase/chloride channel, C-terminal
	Locus_10954_Transcript_3_5	162	28	153	55		211.166	109.447	222.205	87.3641					-0.948145	-1.34678		ZM01G11850	3587_HOM000755	Thioredoxin-like fold;Glutathione S-transferase, C-terminal-like; Glutathione S-transferase/chloride channel, C-terminal
	Locus_10954_Transcript_4_5	148	29	140	69		192.917	113.356	203.325	109.602					-0.767122	-0.891511		ZM01G11850	3587_HOM000755	Thioredoxin-like fold;Glutathione S-transferase, C-terminal-like; Glutathione S-transferase/chloride channel, C-terminal
	Locus_10972_Transcript_4_5	43	29	40	62		29.9859	60.6434	31.0786	52.6867					1.01607	0.761516		ZM04G07910	3587_HOM001641	Major sperm protein;PapD-like
	Locus_1106_Transcript_2_2	27	21	30	66		24.6194	57.4209	30.4782	73.3362					1.22178	1.26675		SB03G037040	3587_HOM000852	Dehydrogenase, multihelical;3-hydroxyacyl-CoA dehydrogenase, NAD binding; 6-phosphogluconate dehydrogenase
	Locus_11085_Transcript_1_1	9	16	1	10		10.313	54.9793	1.27672	13.9638					2.41443	3.45118		null		Unavailable
	Locus_11097_Transcript_1_2	156	27	199	84		64.6941	33.5769	91.949	42.4503					-0.946164	-1.11506		SB01G047070	3587_HOM004327	DNA methylase, N-6 adenine-specific, conserved site;MT-A70
	Locus_111_Transcript_1_13	108	79	171	217		855.271	1876.05	1508.79	2094.12					1.13324	0.472946		BD1G25837	3587_HOM001023	Translation initiation factor SUI1;Eukaryotic translation initiation factor SUI1
	Locus_11118_Transcript_3_8	1	9	1	10		1.44887	39.103	1.6143	17.656					4.75428	3.45118		SB09G004650	3587_HOM000012	Plant peroxidase;Peroxidases heam-ligand binding site; Peroxidase, active site
	Locus_11118_Transcript_5_8	7	12	8	31		6.61226	33.9915	8.41967	35.6841					2.36196	2.08344		SB09G004650	3587_HOM000012	Plant peroxidase;Peroxidases heam-ligand binding site; Peroxidase, active site
	Locus_11118_Transcript_8_8	5	9	2	17		7.21723	38.9565	3.2165	29.9027					2.43235	3.21671		SB09G004650	3587_HOM000012	Plant peroxidase;Peroxidases heam-ligand binding site; Peroxidase, active site
	Locus_11305_Transcript_4_6	1	8	2	15		0.604707	14.5068	1.3475	11.0534					4.58435	3.03614		SB07G002250	3587_HOM000311	Amino acid transporter, transmembrane
	Locus_11305_Transcript_6_6	2	15	3	16		1.24792	28.0664	2.08561	12.1657					4.49124	2.54428		SB07G002250	3587_HOM000311	Amino acid transporter, transmembrane
	Locus_1138_Transcript_1_3	778	191	393	231		322.526	237.441	181.523	116.696					-0.441847	-0.637389		OS03G05730	3587_HOM000025	ATPase, AAA-type, core;ATPase, AAA-type, CDC48; ATPase, AAA+ type, core
	Locus_1138_Transcript_3_3	774	195	386	265		316.331	238.986	175.768	131.98					-0.404509	-0.413361		SB01G047410	3587_HOM000025	ATPase, AAA-type, core;ATPase, AAA+ type, core; ATPase, AAA-type, CDC48
	Locus_11391_Transcript_2_3	198	42	136	77		55.7816	35.4823	42.6892	26.4349					-0.652689	-0.691429		BD1G10520	3587_HOM000655	Phytochrome A/B/C/D/E;Phytochrome, central region; PAS fold
	Locus_1153_Transcript_4_10	23	19	8	29		27.9334	69.1969	10.8253	42.9195					1.30872	1.98723		SB09G028590	3587_HOM000870	Ribosomal protein L18ae/LX;Ribosomal protein L18ae
	Locus_1153_Transcript_6_10	31	29	21	43		40.9625	114.911	30.917	69.2396					1.48814	1.16319		SB05G007540	3587_HOM000870	Ribosomal protein L18ae/LX;Ribosomal protein L18ae
	Locus_1153_Transcript_9_10	250	161	120	287		315.902	610.063	168.946	441.931					0.949483	1.38726		SB09G028590	3587_HOM000870	Ribosomal protein L18ae/LX;Ribosomal protein L18ae
	Locus_11573_Transcript_1_1	41	3	65	24		23.0453	5.05658	40.7067	16.4388					-2.18824	-1.30816		SB03G045360	3587_HOM002119	Unavailable
	Locus_11691_Transcript_1_3	60	4	36	8		194.319	38.8474	129.904	31.573					-2.32254	-2.04068		SB01G014100	3587_HOM004822	protein translocase protein TATA, chloroplastic
	Locus_11691_Transcript_2_3	38	2	29	8		37.014	5.84184	31.4727	9.49584					-2.66358	-1.72873		SB01G014100	3587_HOM004822	protein translocase protein TATA, chloroplastic
	Locus_11693_Transcript_2_5	2	6	0	7		2.31472	20.8236	0.001	9.87249					3.16931	13.2692		SB05G006010	3587_HOM000159	Amino acid transporter, transmembrane
	Locus_1170_Transcript_4_6	21	18	13	44		11.3992	29.2997	7.86231	29.105					1.36196	1.88824		SB06G020720	3587_HOM004596	Malate synthase A;Pyruvate/Phosphoenolpyruvate kinase, catalytic core; Malate synthase-like, core
	Locus_11700_Transcript_1_4	5	9	6	27		4.52702	24.4355	6.05267	29.7897					2.43235	2.29917		SB06G028990	3587_HOM000741	FMN-dependent dehydrogenase; FMN-dependent alpha-hydroxy acid dehydrogenase, active site
	Locus_1171_Transcript_4_5	41	32	28	52		60.9309	142.607	46.3623	94.1711					1.2268	1.02233		SB02G038810	3587_HOM108744	Unavailable
	Locus_11998_Transcript_1_3	1	6	0	9		0.773896	13.9242	0.001	8.48762					4.16931	13.0511		SB05G001590	3587_HOM000018	No apical meristem (NAM) protein
	Locus_11998_Transcript_3_3	0	5	0	19		0.001	11.6503	0.001	17.9906					13.5081	14.135		SB05G001590	3587_HOM000018	No apical meristem (NAM) protein
	Locus_1200_Transcript_4_7	29	25	12	44		20.3458	52.596	9.38017	37.6175					1.37023	2.00372		SB10G028780	3587_HOM000019	Serine/threonine-protein kinase-like domain;Protein kinase, ATP binding site; Tyrosine-protein kinase, catalytic domain
	Locus_1200_Transcript_6_7	23	26	19	38		16.0778	54.5014	14.7981	32.37					1.76123	1.12925		SB10G028780	3587_HOM000019	Serine/threonine-protein kinase-like domain;Protein kinase, ATP binding site; Tyrosine-protein kinase, catalytic domain
	Locus_12011_Transcript_1_1	237	46	193	86		47.441	27.6122	43.0444	20.9781					-0.780831	-1.03694		SB04G038510	3587_HOM000178	Callose synthase
	Locus_12068_Transcript_1_1	0	5	0	9		0.001	26.7939	0.001	19.5989					14.7096	14.2585		null		Unavailable
	Locus_1208_Transcript_7_7	126	20	68	30		36.9937	17.6086	22.2444	10.7335					-1.071	-1.05132		SB06G031240	3587_HOM000314	Putative ATPase, plasma membrane-like
	Locus_1210_Transcript_10_11	482	51	113	38		616.47	195.601	161.026	59.2256					-1.65611	-1.443		SB09G005455	3587_HOM007219	DVL
	Locus_1210_Transcript_11_11	185	14	55	12		285.959	64.8928	94.7213	22.6034					-2.13968	-2.06715		SB09G005455	3587_HOM007219	DVL
	Locus_1210_Transcript_2_11	454	40	114	40		541.149	142.974	151.398	58.1008					-1.92027	-1.38171		SB09G005455	3587_HOM007219	DVL
	Locus_1210_Transcript_3_11	235	16	71	14		370.678	75.6809	124.779	26.9103					-2.29217	-2.21314		SB09G005455	3587_HOM007219	DVL
	Locus_1210_Transcript_4_11	230	15	60	11		278.749	54.5146	81.0195	16.2457					-2.35425	-2.31821		SB09G005455	3587_HOM007219	DVL
	Locus_1210_Transcript_5_11	227	13	58	23		259.859	44.6264	73.9764	32.0849					-2.54176	-1.20517		SB09G005455	3587_HOM007219	DVL
	Locus_1210_Transcript_6_11	222	12	73	9		343.15	55.6224	125.721	16.9525					-2.6251	-2.89065		SB09G005455	3587_HOM007219	DVL
	Locus_1210_Transcript_7_11	185	14	60	18		282.559	64.1213	102.104	33.502					-2.13968	-1.60772		SB09G005455	3587_HOM007219	DVL
	Locus_1210_Transcript_8_11	217	11	58	14		348.466	52.97	103.772	27.3961					-2.71777	-1.92138		SB09G005455	3587_HOM007219	DVL
	Locus_1210_Transcript_9_11	217	22	56	15		336.772	102.385	96.8319	28.368					-1.71777	-1.77122		SB09G005455	3587_HOM007219	DVL
	Locus_12129_Transcript_2_2	9	13	16	40		11.8923	51.5116	23.5558	64.4089					2.11487	1.45118		SB09G021610	3587_HOM001039	Inorganic pyrophosphatase
	Locus_12168_Transcript_4_5	21	0	27	6		5.62302	0.001	8.05504	1.95777					-12.4571	-2.04068		OS03G64320	3587_HOM001559	Unavailable
	Locus_12260_Transcript_4_5	16	15	3	18		12.7317	35.7928	2.65976	17.4542					1.49124	2.71421		SB08G004990	3587_HOM000159	Amino acid transporter, transmembrane
	Locus_1243_Transcript_4_6	206	20	117	56		387.28	112.752	245.074	128.294					-1.78022	-0.933762		SB03G044280	3587_HOM001147	Ribosomal protein L27, conserved site;Ribosomal protein L27
	Locus_12493_Transcript_2_4	260	31	237	105		111.918	40.0153	113.666	55.0779					-1.48382	-1.04525		ZM02G08410	3587_HOM000975	Translation elongation factor EFTu/EF1A, domain 2; Translation elongation factor EFG/EF2, domain IV
	Locus_12493_Transcript_3_4	256	30	270	146		110.526	38.8401	129.879	76.8133					-1.50876	-0.757744		SB06G023840	3587_HOM000975	Translation elongation factor EFTu/EF1A, domain 2; Translation elongation factor EFG/EF2, domain IV
	Locus_12493_Transcript_4_4	290	36	227	111		125.205	46.6082	109.195	58.3991					-1.42563	-0.902885		OS04G45490	3587_HOM000975	Translation elongation factor EFTu/EF1A, domain 2; Translation elongation factor EFG/EF2, domain IV
	Locus_12534_Transcript_3_3	47	3	60	11		108.901	20.8445	154.895	31.0589					-2.38528	-2.31821		null		Unavailable
	Locus_1289_Transcript_1_4	163	33	219	101		45.8765	27.8518	68.6753	34.6406					-0.719984	-0.987328		ZM07G05830	3587_HOM000082	Zinc finger, RING-type
	Locus_1291_Transcript_3_6	212	35	137	84		231.022	114.373	166.338	111.547					-1.01429	-0.576467		SB08G015580	3587_HOM000057	RNA recognition motif, RNP-1;Nucleotide-binding, alpha-beta plait; RNA recognition motif, glycine rich protein
	Locus_12912_Transcript_10_14	19	40	8	25		16.6297	104.985	7.80142	26.6644					2.65835	1.7731		SB04G026510	3587_HOM000613	Phenylalanine/histidine ammonia-lyase;L-Aspartase-like; Phenylalanine ammonia-lyase
	Locus_12912_Transcript_11_14	16	43	7	46		14.0039	112.859	6.82624	49.0624					3.01062	2.84545		SB04G026510	3587_HOM000613	Phenylalanine/histidine ammonia-lyase;L-Aspartase-like; Phenylalanine ammonia-lyase
	Locus_12912_Transcript_13_14	17	45	7	34		16.4894	130.89	7.56499	40.188					2.98874	2.40936		SB04G026510	3587_HOM000613	Phenylalanine/histidine ammonia-lyase;L-Aspartase-like; Phenylalanine ammonia-lyase
	Locus_12912_Transcript_14_14	11	23	8	36		9.62771	60.3664	7.80142	38.3967					2.64848	2.29917		SB04G026510	3587_HOM000613	Phenylalanine/histidine ammonia-lyase;L-Aspartase-like; Phenylalanine ammonia-lyase
	Locus_12912_Transcript_6_14	16	33	4	26		14.0039	86.6126	3.90071	27.7309					2.62874	2.82969		SB04G026510	3587_HOM000613	Phenylalanine/histidine ammonia-lyase;L-Aspartase-like; Phenylalanine ammonia-lyase
	Locus_12912_Transcript_7_14	37	48	18	82		32.3596	125.887	17.5399	87.3929					1.95986	2.31687		SB04G026510	3587_HOM000613	Phenylalanine/histidine ammonia-lyase;L-Aspartase-like; Phenylalanine ammonia-lyase
	Locus_12912_Transcript_8_14	9	35	6	23		11.3974	132.913	8.46578	35.4937					3.54371	2.06785		SB04G026510	3587_HOM000613	Phenylalanine/histidine ammonia-lyase;L-Aspartase-like; Phenylalanine ammonia-lyase
	Locus_12912_Transcript_9_14	12	28	6	23		5.37559	37.6132	2.99468	12.5555					2.80674	2.06785		SB04G026510	3587_HOM000613	Phenylalanine/histidine ammonia-lyase;L-Aspartase-like; Phenylalanine ammonia-lyase
	Locus_13222_Transcript_1_1	8	10	4	16		36.273	135.966	20.2072	88.4044					1.90628	2.12925		null		Unavailable
	Locus_1324_Transcript_14_18	49	32	14	58		81.0498	158.724	25.8011	116.908					0.969641	2.17987		SB06G021540	3587_HOM000868	S-adenosylmethionine decarboxylase, conserved site;S-adenosylmethionine decarboxylase, core
	Locus_1324_Transcript_16_18	46	34	24	63		57.8729	128.272	33.642	96.5871					1.14825	1.52156		OSINDICA_04G34100	3587_HOM000868	S-adenosylmethionine decarboxylase, core;S-adenosylmethionine decarboxylase subgroup; S-adenosylmethionine decarboxylase
	Locus_1325_Transcript_1_2	106	62	23	64		150.933	264.732	36.4887	111.05					0.810626	1.60569		SB10G006620	3587_HOM000607	Fructose-1,6-bisphosphatase;Ribosomal protein S17e
	Locus_1325_Transcript_2_2	244	112	55	129		328.803	452.586	82.5776	211.834					0.460968	1.35911		SB10G006620	3587_HOM000607	Fructose-1,6-bisphosphatase;Ribosomal protein S17e
	Locus_13284_Transcript_1_2	2	6	4	15		2.92339	26.2993	6.51434	26.7183					3.16931	2.03614		SB01G002840	3587_HOM003565	Mitochondrial inner membrane translocase complex, Tim8/9/10/13-zinc finger-like
	Locus_1336_Transcript_1_3	7	9	4	20		3.47356	13.3923	2.21152	12.0939					1.94692	2.45118		OSINDICA_03G57840	3587_HOM000083	Heat shock protein 70, conserved site;Heat shock protein 70; Heat shock protein Hsp70
	Locus_13418_Transcript_1_5	112	7	54	25		195.611	36.6615	105.081	53.2079					-2.41565	-0.981784		SB01G035090	3587_HOM002237	Ribosomal protein L6;Ribosomal protein L6, bacterial-type; Ribosomal protein L6, alpha-beta domain
	Locus_13418_Transcript_2_5	93	8	55	20		84.6666	21.8402	55.7886	22.1881					-1.95481	-1.33018		SB01G035090	3587_HOM002237	Ribosomal protein L6;Ribosomal protein L6, bacterial-type; Ribosomal protein L6, alpha-beta domain
	Locus_13418_Transcript_3_5	107	11	50	18		98.7338	30.4377	51.405	20.2402					-1.69768	-1.34468		SB01G035090	3587_HOM002237	Ribosomal protein L6;Ribosomal protein L6, bacterial-type; Ribosomal protein L6, alpha-beta domain
	Locus_13418_Transcript_4_5	319	27	147	77		194.735	49.4258	99.9825	57.2802					-1.97817	-0.803638		SB01G035090	3587_HOM002237	Ribosomal protein L6;Ribosomal protein L6, bacterial-type; Ribosomal protein L6, alpha-beta domain
	Locus_13418_Transcript_5_5	311	28	139	68		361.385	97.5675	179.961	96.2897					-1.88907	-0.902231		SB01G035090	3587_HOM002237	Ribosomal protein L6;Ribosomal protein L6, bacterial-type; Ribosomal protein L6, alpha-beta domain
	Locus_1349_Transcript_1_4	12	18	6	26		11.2984	50.8211	6.29419	29.8311					2.16931	2.24472		SB07G024860	3587_HOM000021	Acyl carrier protein 3, chloroplastic
	Locus_1350_Transcript_1_3	33	29	20	41		27.3706	72.1282	18.4822	41.4396					1.39794	1.16487		SB06G030400	3587_HOM004086	ATPase, V1/A1 complex, subunit D
	Locus_1353_Transcript_16_18	32	24	14	51		32.0888	72.1692	15.6418	62.3211					1.16931	1.99432		SB04G026930	3587_HOM002062	Nitrilase/cyanide hydratase and apolipoprotein N-acyltransferase;Nitrilase/cyanide hydratase, conserved site
	Locus_136_Transcript_2_3	35	28	39	62		40.1061	96.2137	49.7921	86.5754					1.26242	0.798042		SB09G019630	3587_HOM000847	Unavailable
	Locus_1377_Transcript_4_4	29	24	22	47		16.1434	40.0631	13.645	31.8827					1.31133	1.2244		SB01G006320	3587_HOM002344	IMP dehydrogenase/GMP reductase;IMP dehydrogenase; Cystathionine beta-synthase, core
	Locus_13797_Transcript_1_1	8	20	4	26		8.73428	65.4793	4.86576	34.5917					2.90628	2.82969		ZM04G37190	3587_HOM000012	Plant peroxidase;Peroxidases heam-ligand binding site; Peroxidase, active site
	Locus_13875_Transcript_2_2	0	4	5	19		0.001	24.854	11.5431	47.9748					14.6012	2.05525		null		Unavailable
	Locus_13998_Transcript_3_6	21	0	8	0		13.7021	0.001	5.81585	0.001					-13.7421	-12.5058		ZM05G35110	3587_HOM000988	Aldehyde dehydrogenase, N-terminal;Aldehyde/histidinol dehydrogenase; Aldehyde dehydrogenase
	Locus_14010_Transcript_2_3	0	4	2	13		0.001	45.4706	8.44728	60.0534					15.4726	2.82969		SB06G026710	3587_HOM000102	Protein of unknown function DUF581
	Locus_14010_Transcript_3_3	6	14	5	48		13.6559	95.5508	12.6792	133.129					2.80674	3.39228		SB06G026710	3587_HOM000102	Protein of unknown function DUF581
	Locus_14139_Transcript_1_4	12	22	15	37		7.23379	39.769	10.0746	27.1799					2.45882	1.43181		SB01G029400	3587_HOM003416	Xylanase inhibitor protein 1
	Locus_14139_Transcript_4_4	19	20	10	36		11.4535	36.1536	6.71642	26.4453					1.65835	1.97724		SB01G029400	3587_HOM003416	Xylanase inhibitor protein 1
	Locus_14202_Transcript_1_1	144	27	227	145		49.171	27.6469	86.3626	60.3358					-0.830687	-0.517392		BD5G09930	3587_HOM003236	Unavailable
	Locus_14281_Transcript_1_1	2	10	6	27		5.66765	84.9787	18.9443	93.239					3.90628	2.29917		SB08G017240	3587_HOM000327	NADPH oxidase Respiratory burst;Ferric reductase-like transmembrane component, N-terminal; Riboflavin synthase-like beta-barrel
	Locus_14317_Transcript_1_1	9	16	34	58		6.34114	33.805	26.6905	49.7982					2.41443	0.899766		SB09G003460	3587_HOM002054	Sucrose-6-phosphate phosphohydrolase C-terminal;Sucrose phosphatase, plant/cyanobacteria
	Locus_14432_Transcript_2_2	9	12	58	113		10.1421	40.5512	72.8228	155.176					1.99939	1.09145		ZM06G10150	3587_HOM000102	Protein of unknown function DUF581
	Locus_1444_Transcript_1_2	225	180	188	289		156.998	376.635	146.158	245.736					1.26242	0.749584		SB04G019020	3587_HOM000648	Fructose-bisphosphate aldolase, class-I;Aldolase-type TIM barrel
	Locus_1444_Transcript_2_2	210	157	193	289		147.421	330.504	150.956	247.228					1.16473	0.711716		SB04G019020	3587_HOM000648	Fructose-bisphosphate aldolase, class-I;Aldolase-type TIM barrel
	Locus_14453_Transcript_1_1	9	11	51	88		21.6788	79.4551	136.872	258.307					1.87386	0.916254		ZM10G07750	3587_HOM005386	Microtubule-associated protein CRIPT
	Locus_14487_Transcript_5_5	8	11	15	34		6.37464	26.2842	13.3171	33.0146					2.04378	1.30982		SB02G037160	3587_HOM004648	FMN-binding split barrel;Haem iron utilisation protein, pyridoxamine 5'-phosphate domain-containing; FMN-binding split barrel, related
	Locus_1455_Transcript_2_2	143	93	136	172		124.5	242.804	131.925	182.484					0.963638	0.468049		SB01G045210	3587_HOM000261	Proteasome, alpha-subunit, conserved site;Proteasome, subunit alpha/beta
	Locus_146_Transcript_15_17	69	9	19	4		97.4088	38.1003	29.8852	6.88129					-1.35425	-2.11868		SB03G009560	3587_HOM086181	Unavailable
	Locus_1460_Transcript_1_1	301	137	97	247		465.262	635.022	167.054	465.253					0.448763	1.4777		SB03G006610	3587_HOM001377	Translation protein SH3-like;KOW; Ribosomal protein L24/L26, conserved site; KOW
	Locus_14683_Transcript_4_4	12	13	13	38		10.9333	35.5183	13.1968	42.1906					1.69983	1.67674		SB02G027080	3587_HOM000077	Thioredoxin-like fold;Glutathione S-transferase, C-terminal-like; Glutathione S-transferase/chloride channel, C-terminal
	Locus_1470_Transcript_1_3	206	40	227	109		155.164	90.3487	190.504	100.049					-0.780222	-0.929117		SB04G034180	3587_HOM000995	Protein of unknown function DUF1685
	Locus_1470_Transcript_2_3	220	37	204	96		163.894	82.6571	169.327	87.1512					-0.987556	-0.958215		SB04G034180	3587_HOM000995	Protein of unknown function DUF1685
	Locus_14714_Transcript_1_4	11	12	1	19		15.2314	49.827	1.54277	32.0598					1.70988	4.37717		SB09G030780	3587_HOM000711	Lateral organ boundaries, LOB
	Locus_14714_Transcript_2_4	7	12	6	31		9.73935	50.0669	9.30115	52.5599					2.36196	2.49848		SB09G030780	3587_HOM000711	Lateral organ boundaries, LOB
	Locus_14714_Transcript_3_4	9	12	3	23		11.1411	44.5456	4.13772	34.6956					1.99939	3.06785		SB09G030780	3587_HOM000711	Lateral organ boundaries, LOB
	Locus_14714_Transcript_4_4	7	15	7	46		8.74018	56.163	9.73809	69.9908					2.68389	2.84545		SB09G030780	3587_HOM000711	Lateral organ boundaries, LOB
	Locus_1474_Transcript_2_2	70	50	56	98		89.3312	191.343	79.6245	152.402					1.09892	0.936602		ZM02G14960	3587_HOM006253	Unavailable
	Locus_14846_Transcript_1_1	123	16	128	73		52.8672	20.6223	61.2977	38.2353					-1.35816	-0.680928		OS01G41870	3587_HOM000004	BRASSINOSTEROID INSENSITIVE 1-associated receptor kinase 1
	Locus_15020_Transcript_1_2	53	33	54	79		55.8093	104.203	63.3546	101.372					0.900824	0.678141		SB05G001560	3587_HOM000585	Nucleoside phosphatase GDA1/CD39
	Locus_15062_Transcript_2_2	5	13	11	26		2.29587	17.9002	5.6276	14.5483					2.96286	1.37026		OSINDICA_01G54560	3587_HOM000006	G-type lectin S-receptor-like serine/threonine-protein kinase
	Locus_1513_Transcript_1_3	1	23	9	68		2.5026	172.606	25.095	207.377					6.10791	3.04679		SB03G007170	3587_HOM007820	Proteinase inhibitor I12, Bowman-Birk
	Locus_1513_Transcript_2_3	0	15	13	56		0.001	93.0357	29.9584	141.147					16.5055	2.23616		SB03G007170	3587_HOM007820	Proteinase inhibitor I12, Bowman-Birk
	Locus_1513_Transcript_3_3	2	26	15	108		5.02696	195.968	42.0068	330.796					5.28479	2.97724		SB03G007170	3587_HOM007820	Proteinase inhibitor I12, Bowman-Birk
	Locus_1514_Transcript_1_5	33	24	7	29		76.4621	166.756	18.0711	81.8826					1.12492	2.17987		ZM02G11590	3587_HOM000205	Bifunctional inhibitor/plant lipid transfer protein/seed storage;Plant lipid transfer protein/hydrophobic protein
	Locus_1514_Transcript_2_5	45	80	34	87		88.9385	474.137	74.8703	209.535					2.41443	1.48473		ZM02G11590	3587_HOM000205	Bifunctional inhibitor/plant lipid transfer protein/seed storage;Plant lipid transfer protein/hydrophobic protein
	Locus_1514_Transcript_3_5	41	32	14	43		104.185	243.842	39.6372	133.153					1.2268	1.74816		ZM02G11590	3587_HOM000205	Bifunctional inhibitor/plant lipid transfer protein/seed storage;Plant lipid transfer protein/hydrophobic protein
	Locus_1514_Transcript_5_5	47	36	11	35		110.226	253.178	28.743	100.027					1.19969	1.7991		ZM02G11590	3587_HOM000205	Bifunctional inhibitor/plant lipid transfer protein/seed storage;Plant lipid transfer protein/hydrophobic protein
	Locus_15143_Transcript_1_1	23	21	50	77		14.1903	38.8526	34.3706	57.8915					1.45311	0.752178		SB04G018940	3587_HOM000539	Membrane attack complex component/perforin (MACPF) domain;Membrane attack complex component/perforin (MACPF) domain, metazoa
	Locus_15205_Transcript_1_3	178	13	71	31		833.213	182.481	370.295	176.831					-2.19094	-1.0663		null		Unavailable
	Locus_15242_Transcript_1_10	749	114	259	165		629.814	287.457	242.652	169.073					-1.13158	-0.521239		ZM06G23980	3587_HOM002458	PPDK1 - Pyruvate, phosphate dikinase 1, chloroplastic
	Locus_15242_Transcript_10_10	1046	141	373	173		915.508	370.072	363.741	184.517					-1.30677	-0.979156		ZM06G23980	3587_HOM002458	PPDK1 - Pyruvate, phosphate dikinase 1, chloroplastic
	Locus_15242_Transcript_2_10	605	103	270	118		497.158	253.813	247.204	118.163					-0.96994	-1.06493		ZM06G23980	3587_HOM002458	PPDK1 - Pyruvate, phosphate dikinase 1, chloroplastic
	Locus_15242_Transcript_4_10	99	16	55	19		87.8464	42.5741	54.3757	20.5449					-1.04501	-1.40418		ZM08G16170	3587_HOM002458	PPDK1 - Pyruvate, phosphate dikinase 1, chloroplastic
	Locus_15242_Transcript_7_10	119	14	40	17		90.8171	32.0395	34.0121	15.8099					-1.50311	-1.10522		ZM08G16170	3587_HOM002458	PPDK1 - Pyruvate, phosphate dikinase 1, chloroplastic
	Locus_15296_Transcript_1_1	19	19	62	136		5.39484	16.1777	19.6142	47.0571					1.58435	1.26251		SB09G027330	3587_HOM000071	ABC transporter, conserved site;ATPase, AAA+ type, core; ABC transporter, transmembrane domain
	Locus_153_Transcript_1_3	97	77	70	160		117.191	278.964	94.2264	235.56					1.25122	1.32189		ZM08G33320	3587_HOM000925	Proteinase inhibitor I25, cystatin, conserved region;Proteinase inhibitor I25, cystatin
	Locus_153_Transcript_2_3	96	84	70	147		63.3534	166.232	51.4696	118.216					1.39171	1.19964		ZM08G33320	3587_HOM000925	Proteinase inhibitor I25, cystatin, conserved region;Proteinase inhibitor I25, cystatin
	Locus_153_Transcript_3_3	91	75	83	176		60.0538	148.422	61.0282	141.538					1.30537	1.21364		ZM08G33320	3587_HOM000925	Proteinase inhibitor I25, cystatin, conserved region;Proteinase inhibitor I25, cystatin
	Locus_1547_Transcript_1_5	21	17	9	27		16.3503	39.691	7.80733	25.6172					1.2795	1.71421		SB02G035760	3587_HOM000682	Ribosomal protein L38e
	Locus_15476_Transcript_1_2	5	8	6	24		3.70577	17.7802	4.95465	21.6761					2.26242	2.12925		ZM07G18060	3587_HOM000069	NAD(P)-binding domain;NAD-dependent epimerase/dehydratase
	Locus_15476_Transcript_2_2	7	12	10	24		5.62432	28.9128	8.95212	23.4987					2.36196	1.39228		ZM07G18060	3587_HOM000069	NAD(P)-binding domain;NAD-dependent epimerase/dehydratase
	Locus_15789_Transcript_1_1	10	14	5	23		9.2201	38.708	5.1364	25.8419					2.06978	2.33088		SB01G041760	3587_HOM000012	Plant peroxidase;Peroxidases heam-ligand binding site; Peroxidase, active site
	Locus_16047_Transcript_2_4	4	19	6	19		3.09144	44.0344	5.16662	17.8944					3.83228	1.79221		SB03G040280	3587_HOM000005	Cytochrome P450;Cytochrome P450, E-class, group I; Cytochrome P450, conserved site
	Locus_1616_Transcript_1_4	37	31	69	105		45.2214	113.616	93.9603	156.384					1.32909	0.734968		SB09G022110	3587_HOM003295	Unavailable
	Locus_1616_Transcript_3_4	6	22	46	72		6.89583	75.8219	58.9042	100.839					3.45882	0.77561		SB09G022110	3587_HOM003295	Unavailable
	Locus_1629_Transcript_1_1	28	123	65	346		28.1265	370.51	72.7486	423.54					3.71951	2.54151		SB02G004650	3587_HOM000313	Xylanase inhibitor protein 1
	Locus_16329_Transcript_1_1	12	66	76	115		15.4848	255.391	109.268	180.836					4.04378	0.72681		SB04G036230	3587_HOM000354	Inorganic H+ pyrophosphatase
	Locus_16369_Transcript_1_1	19	22	43	78		10.1094	35.1021	25.4915	50.5742					1.79585	0.988385		SB03G005240	3587_HOM000750	Thiamine pyrophosphate enzyme, N-terminal TPP-binding domain; Pyruvate decarboxylase/indolepyruvate decarboxylase
	Locus_16378_Transcript_3_4	10	12	5	19		8.28817	29.8248	4.61724	19.1899					1.84738	2.05525		SB03G038080	3587_HOM001470	Homeodomain-related;Homeobox; Homeodomain-like
	Locus_1640_Transcript_4_8	92	13	106	42		138.503	58.6884	177.8	77.0517					-1.23877	-1.20636		ZM05G18570	3587_HOM005279	Unavailable
	Locus_1640_Transcript_5_8	163	32	122	54		225.431	132.713	187.992	91.0084					-0.764378	-1.0466		SB04G002620	3587_HOM005279	Unavailable
	Locus_1640_Transcript_7_8	157	22	135	68		216.099	90.8058	207.034	114.057					-1.25084	-0.860105		SB04G002620	3587_HOM005279	Unavailable
	Locus_1655_Transcript_1_2	2	13	9	23		8.50147	165.708	42.6246	119.139					4.28479	1.48288		null		Unavailable
	Locus_16569_Transcript_1_1	11	21	29	101		17.0029	97.3392	49.944	190.245					2.51724	1.92948		SB10G028070	3587_HOM000141	Rare lipoprotein A;Expansin 45, endoglucanase-like; Barwin-related endoglucanase
	Locus_16581_Transcript_1_1	43	3	161	57		20.3174	4.25067	84.7576	32.8197					-2.25695	-1.36878		SB02G035270	3587_HOM003503	NUC153
	Locus_1691_Transcript_1_5	7	15	9	53		23.3239	149.876	33.4118	215.199					2.68389	2.68724		null		Unavailable
	Locus_1691_Transcript_2_5	1	10	6	53		3.29402	98.7786	22.0207	212.747					4.90628	3.27221		null		Unavailable
	Locus_1691_Transcript_4_5	7	10	7	39		23.8743	102.275	26.6002	162.091					2.09892	2.60729		null		Unavailable
	Locus_1732_Transcript_1_8	23	24	10	36		19.4818	60.9605	9.43744	37.159					1.64575	1.97724		BD2G59850	3587_HOM000393	Thioredoxin-like fold;Glutathione S-transferase, C-terminal-like; Glutathione S-transferase/chloride channel, C-terminal
	Locus_1732_Transcript_3_8	27	37	10	38		19.5353	80.2777	8.06139	33.5043					2.03892	2.05525		BD2G59850	3587_HOM000393	Thioredoxin-like fold;Glutathione S-transferase, C-terminal-like; Glutathione S-transferase/chloride channel, C-terminal
	Locus_1732_Transcript_5_8	17	18	12	34		12.3154	39.103	9.68579	30.0151					1.66681	1.63175		BD2G59850	3587_HOM000393	Thioredoxin-like fold;Glutathione S-transferase, C-terminal-like; Glutathione S-transferase/chloride channel, C-terminal
	Locus_1732_Transcript_6_8	19	16	15	42		15.0464	37.9959	13.235	40.5313					1.33642	1.61467		BD2G59850	3587_HOM000393	Thioredoxin-like fold;Glutathione S-transferase, C-terminal-like; Glutathione S-transferase/chloride channel, C-terminal
	Locus_1732_Transcript_8_8	22	29	11	26		18.5262	73.2314	10.3207	26.6807					1.9829	1.37026		BD2G59850	3587_HOM000393	Thioredoxin-like fold;Glutathione S-transferase, C-terminal-like; Glutathione S-transferase/chloride channel, C-terminal
	Locus_17329_Transcript_4_5	4	20	19	46		1.75915	26.376	9.31	24.6525					3.90628	1.40488		BD5G15560	3587_HOM000052	Leucine-rich repeat, typical subtype;NB-ARC; Disease resistance protein
	Locus_1750_Transcript_1_1	35	24	9	33		45.5197	93.6008	13.0415	52.3005					1.04003	2.00372		SB03G011590	3587_HOM000084	Cupin 1;Germin, manganese binding site; Cupin, RmlC-type
	Locus_1761_Transcript_1_1	3	14	0	11		8.91671	124.781	0.001	39.8416					3.80674	15.282		ZM02G12360	3587_HOM005803	Proteinase inhibitor I12, Bowman-Birk
	Locus_1779_Transcript_3_3	52	38	43	68		57.0963	125.12	52.605	90.986					1.13184	0.790446		SB09G018480	3587_HOM008625	Unavailable
	Locus_17817_Transcript_1_1	0	6	1	9		0.001	36.6246	2.26798	22.3248					15.1605	3.29917		null		Unavailable
	Locus_17872_Transcript_1_1	22	88	11	47		80.495	965.53	44.8428	209.558					3.58435	2.2244		SB02G042860	3587_HOM000012	Plant peroxidase;Peroxidases heam-ligand binding site; Peroxidase, active site
	Locus_1802_Transcript_1_6	2	8	1	13		4.92	59.015	2.74087	38.9708					3.58435	3.82969		SB07G024270	3587_HOM000097	O-methyltransferase, COMT, eukaryota;Plant methyltransferase dimerisation; O-methyltransferase, family 2
	Locus_1802_Transcript_6_6	19	18	7	35		19.2363	54.6483	7.89621	43.1813					1.50635	2.45118		SB07G024270	3587_HOM000097	O-methyltransferase, COMT, eukaryota;Plant methyltransferase dimerisation; O-methyltransferase, family 2
	Locus_1808_Transcript_1_10	112	70	63	134		60.0624	112.569	37.6425	87.5689					0.906279	1.21806		SB03G013170	3587_HOM117851	S-adenosylmethionine synthetase
	Locus_1808_Transcript_10_10	114	68	52	150		61.1633	109.404	31.0844	98.0704					0.838923	1.65763		SB03G013170	3587_HOM117851	S-adenosylmethionine synthetase
	Locus_1808_Transcript_2_10	79	61	53	92		42.4047	98.1871	31.6969	60.1778					1.21131	0.924889		SB03G013170	3587_HOM117851	S-adenosylmethionine synthetase
	Locus_1808_Transcript_3_10	135	69	62	108		72.2291	110.704	36.9593	70.4146					0.616059	0.929939		SB03G013170	3587_HOM117851	S-adenosylmethionine synthetase
	Locus_1808_Transcript_4_10	113	69	66	129		60.796	111.322	39.5635	84.576					0.872696	1.09608		SB03G013170	3587_HOM117851	S-adenosylmethionine synthetase
	Locus_1808_Transcript_6_10	130	75	60	147		69.9423	121.003	35.9668	96.3773					0.790801	1.42203		SB03G013170	3587_HOM117851	S-adenosylmethionine synthetase
	Locus_1808_Transcript_7_10	131	83	63	123		70.1539	133.289	37.5902	80.2687					0.925967	1.09448		SB03G013170	3587_HOM117851	S-adenosylmethionine synthetase
	Locus_1808_Transcript_8_10	133	89	73	117		70.962	142.397	43.3961	76.0713					1.0048	0.809788		SB03G013170	3587_HOM117851	S-adenosylmethionine synthetase
	Locus_18392_Transcript_9_11	51	1	35	11		10.0402	0.590351	7.67706	2.63892					-4.08807	-1.5406		BD5G23890	3587_HOM000792	Tetratricopeptide-like helical;Tetratricopeptide repeat; Tetratricopeptide repeat-containing
	Locus_1843_Transcript_11_13	20	18	10	36		18.6184	50.2483	10.3721	40.839					1.43235	1.97724		ZM02G41460	3587_HOM000453	Plant ascorbate peroxidase;Haem peroxidase, plant/fungal/bacterial; Haem peroxidase
	Locus_1843_Transcript_13_13	14	17	10	28		16.3009	59.3567	12.9729	39.7286					1.86446	1.61467		ZM02G41460	3587_HOM000453	Plant ascorbate peroxidase;Haem peroxidase, plant/fungal/bacterial; Haem peroxidase
	Locus_1843_Transcript_4_13	18	16	13	37		20.7287	55.2531	16.68	51.9233					1.41443	1.63826		SB02G044060	3587_HOM000453	Plant ascorbate peroxidase;Haem peroxidase, plant/fungal/bacterial; Haem peroxidase
	Locus_1843_Transcript_5_13	14	14	5	28		14.1493	42.4299	5.63029	34.4847					1.58435	2.61467		ZM02G41460	3587_HOM000453	Plant ascorbate peroxidase;Haem peroxidase, plant/fungal/bacterial; Haem peroxidase
	Locus_1843_Transcript_6_13	14	19	7	29		8.35232	33.9915	4.65298	21.0833					2.02492	2.17987		ZM02G41460	3587_HOM000453	Plant ascorbate peroxidase;Haem peroxidase, plant/fungal/bacterial; Haem peroxidase
	Locus_1843_Transcript_9_13	17	18	11	30		18.2671	58.0003	13.1694	39.2828					1.66681	1.57671		ZM02G41460	3587_HOM000453	Plant ascorbate peroxidase;Haem peroxidase, plant/fungal/bacterial; Haem peroxidase
	Locus_18470_Transcript_2_3	30	22	7	23		12.8372	28.2298	3.33733	11.9932					1.13689	1.84545		ZM10G27260	3587_HOM000137	Endoglucanase 10
	Locus_1849_Transcript_5_8	3	7	4	15		5.23958	36.6615	7.78375	31.9247					2.80674	2.03614		null		Unavailable
	Locus_1878_Transcript_1_7	26	1	19	2		10.2773	1.18534	8.36786	0.963381					-3.11609	-3.11868		ZM05G26830	3587_HOM001051	Major facilitator superfamily, general substrate transporter;Sugar/inositol transporter
	Locus_1878_Transcript_7_7	24	0	25	3		9.25577	0.001	10.7422	1.40988					-13.1761	-2.92965		ZM10G22930	3587_HOM001051	Major facilitator superfamily, general substrate transporter;Sugar/inositol transporter
	Locus_18796_Transcript_2_3	238	20	78	25		250.387	63.0961	91.4289	32.0506					-1.98854	-1.5123		SB02G011330	3587_HOM000172	RNA recognition motif, RNP-1;Nucleotide-binding, alpha-beta plait; RNA recognition motif, glycine rich protein
	Locus_18796_Transcript_3_3	214	23	84	34		259.629	83.6768	113.546	50.2667					-1.63355	-1.17561		SB02G011330	3587_HOM000172	RNA recognition motif, RNP-1;Nucleotide-binding, alpha-beta plait
	Locus_1904_Transcript_1_4	4	11	6	23		1.98064	16.3334	3.31018	13.8783					3.04378	2.06785		SB04G029830	3587_HOM002156	Unavailable
	Locus_1904_Transcript_2_4	6	14	17	38		2.37007	16.5835	7.48192	18.2917					2.80674	1.28971		SB04G029830	3587_HOM002156	Unavailable
	Locus_1904_Transcript_3_4	7	10	16	40		2.5057	10.7341	6.38123	17.4482					2.09892	1.45118		SB04G029830	3587_HOM002156	Unavailable
	Locus_1904_Transcript_4_4	12	12	20	39		5.11782	15.3469	9.50358	20.2688					1.58435	1.09272		SB04G029830	3587_HOM002156	Unavailable
	Locus_19195_Transcript_3_4	0	8	13	32		0.001	66.6756	40.2566	108.38					16.0249	1.42881		SB10G002890	3587_HOM001676	Early nodulin 93 ENOD93 protein
	Locus_19234_Transcript_1_2	3	18	7	45		7.55687	135.966	19.6459	138.132					4.16931	2.81375		null		Unavailable
	Locus_19234_Transcript_2_2	7	24	10	69		14.5827	149.93	23.211	175.166					3.36196	2.91584		null		Unavailable
	Locus_1948_Transcript_1_2	68	41	32	66		98.032	177.247	51.3999	115.948					0.85444	1.17364		SB09G000730	3587_HOM122698	Actin/actin-like
	Locus_1951_Transcript_4_4	2	14	7	21		3.47729	72.9922	13.5601	44.493					4.39171	1.71421		SB05G022960	3587_HOM001672	Pathogenesis-related protein PR
	Locus_1960_Transcript_2_4	61	37	24	49		36.2613	65.9557	15.8956	35.4953					0.863066	1.15899		SB02G006200	3587_HOM001646	Ribosomal protein S5, N-terminal;Ribosomal protein S5 domain 2-type fold; Double-stranded RNA-binding-like
	Locus_1969_Transcript_1_4	221	197	134	193		254.249	679.626	171.761	270.573					1.4185	0.655615		SB02G031170	3587_HOM000621	Ribonuclease T2
	Locus_1969_Transcript_2_4	203	255	153	339		349.789	1317.61	293.735	711.822					1.91337	1.277		SB02G031170	3587_HOM000621	Ribonuclease T2
	Locus_1969_Transcript_3_4	461	498	284	587		334.594	1083.89	229.662	519.178					1.69573	1.17672		SB02G031170	3587_HOM000621	Ribonuclease T2
	Locus_1969_Transcript_4_4	419	492	254	603		313.153	1102.67	211.51	549.188					1.81606	1.37658		SB02G031170	3587_HOM000621	Ribonuclease T2
	Locus_1980_Transcript_12_15	11	12	27	67		3.0088	9.84281	8.22845	22.3325					1.70988	1.44045		ZM04G26400	3587_HOM003826	Saccharopine dehydrogenase Homospermidine synthase;NAD(P)-binding domain; LOR/SDH bifunctional enzyme, conserved domain
	Locus_1980_Transcript_14_15	12	15	17	75		3.49129	13.0868	5.51071	26.5906					1.90628	2.2706		OSINDICA_02G52590	3587_HOM003826	Saccharopine dehydrogenase / Homospermidine synthase;NAD(P)-binding domain; LOR/SDH bifunctional enzyme, conserved domain
	Locus_1980_Transcript_15_15	12	13	28	70		3.49129	11.3419	9.07647	24.8179					1.69983	1.45118		SB04G035220	3587_HOM003826	Saccharopine dehydrogenase / Homospermidine synthase;NAD(P)-binding domain; LOR/SDH bifunctional enzyme, conserved domain
	Locus_1980_Transcript_8_15	9	13	14	70		2.62243	11.359	4.5451	24.8554					2.11487	2.45118		BD3G60160	3587_HOM003826	Saccharopine dehydrogenase / Homospermidine synthase;NAD(P)-binding domain; LOR/SDH bifunctional enzyme, conserved domain
	Locus_1980_Transcript_9_15	10	13	29	52		2.90357	11.3191	9.38174	18.3991					1.96286	0.971706		OSINDICA_02G52590	3587_HOM003826	Saccharopine dehydrogenase / Homospermidine synthase;NAD(P)-binding domain; LOR/SDH bifunctional enzyme, conserved domain
	Locus_19834_Transcript_1_1	36	25	30	57		32.1167	66.8814	29.8197	61.9675					1.05828	1.05525		SB02G036840	3587_HOM002477	Zinc finger, C2H2-like;Zinc finger, C2H2-type; Zinc finger, AN1-type
	Locus_1984_Transcript_3_5	3	16	11	26		3.57957	57.2488	14.6236	37.8045					3.99939	1.37026		SB07G024945	3587_HOM000109	Heat shock protein DnaJ;Heat shock protein DnaJ, conserved site; Molecular chaperone, heat shock protein, Hsp40, DnaJ
	Locus_19858_Transcript_1_2	61	4	68	27		62.5805	12.3057	77.727	33.7547					-2.34639	-1.20333		SB03G029040	3587_HOM003516	Formylmethionine deformylase
	Locus_1988_Transcript_10_18	329	14	52	14		1591.59	203.095	280.28	82.5323					-2.97024	-1.76384		OS10G21190	3587_HOM014071	Unavailable
	Locus_1988_Transcript_12_18	191	11	40	8		126.119	21.7809	29.428	6.43721					-2.53365	-2.19268		SB10G004750	3587_HOM004128	Outer mitochondrial membrane transport complex protein, Metaxin
	Locus_1988_Transcript_15_18	269	14	43	18		1295.91	202.249	230.804	105.671					-2.67976	-1.12709		OS10G21190	3587_HOM014071	Unavailable
	Locus_2_Transcript_2_7	130	84	53	168		157.06	304.325	71.3429	247.338					0.9543	1.79364		null		Unavailable
	Locus_2_Transcript_3_7	91	54	36	116		109.712	195.229	48.3582	170.425					0.831443	1.8173		null		Unavailable
	Locus_2_Transcript_6_7	92	58	34	125		130.037	245.836	53.5442	215.303					0.918769	2.00757		null		Unavailable
	Locus_2_Transcript_7_7	144	79	46	158		173.974	286.21	61.9202	232.616					0.718206	1.90947		null		Unavailable
	Locus_200_Transcript_1_4	254	128	134	205		193.973	293.126	114.016	190.775					0.595666	0.742638		SB04G029750	3587_HOM115146	Mitochondrial substrate/solute carrier;Adenine nucleotide translocator 1; Mitochondrial substrate carrier
	Locus_200_Transcript_2_4	233	110	116	182		166.19	235.277	92.1853	158.191					0.501524	0.779061		SB04G029750	3587_HOM115146	Mitochondrial substrate/solute carrier;Adenine nucleotide translocator 1; Mitochondrial substrate carrier
	Locus_200_Transcript_4_4	259	119	117	173		194.2	267.567	97.7436	158.072					0.46236	0.693511		SB04G029750	3587_HOM115146	Mitochondrial substrate/solute carrier;Adenine nucleotide translocator 1; Mitochondrial substrate carrier
	Locus_20017_Transcript_3_6	5	9	4	20		19.1424	103.325	17.0624	93.3076					2.43235	2.45118		null		Unavailable
	Locus_2021_Transcript_2_6	124	14	119	38		57.7169	19.541	61.7138	21.5539					-1.56249	-1.51764		SB07G005510	3587_HOM000025	RNA recognition motif, RNP-1;ATPase, AAA-type, core; ATPase, AAA+ type, core
	Locus_2021_Transcript_3_6	110	11	115	33		55.2725	16.5747	64.3825	20.2065					-1.73758	-1.67185		SB07G005510	3587_HOM000025	RNA recognition motif, RNP-1;ATPase, AAA-type, core; ATPase, AAA+ type, core
	Locus_2021_Transcript_6_6	119	12	130	55		55.2562	16.7091	67.2559	31.1213					-1.7255	-1.11176		SB07G005510	3587_HOM000025	RNA recognition motif, RNP-1;ATPase, AAA-type, core; ATPase, AAA+ type, core
	Locus_20280_Transcript_1_1	1	11	3	14		1.31536	43.3884	4.39662	22.4405					5.04378	2.35164		SB08G022420	3587_HOM000107	Thaumatin, conserved site;Thaumatin, pathogenesis-related
	Locus_2034_Transcript_1_1	0	24	3	33		0.001	128.412	5.96393	71.7518					16.9704	3.58868		SB02G037350	3587_HOM000107	Thaumatin, conserved site;Thaumatin, pathogenesis-related
	Locus_2045_Transcript_3_9	30	23	30	68		17.5893	40.4381	19.5975	48.5843					1.20102	1.30982		SB01G007340	3587_HOM000435	Protein phosphatase 2C-related;Protein phosphatase 2C, manganese/magnesium aspartate binding site; Protein phosphatase 2C
	Locus_2045_Transcript_4_9	14	19	28	56		8.76858	35.6855	19.5395	42.7416					2.02492	1.12925		SB01G007340	3587_HOM000435	Protein phosphatase 2C-related;Protein phosphatase 2C, manganese/magnesium aspartate binding site; Protein phosphatase 2C
	Locus_2058_Transcript_2_2	2	11	2	19		1.91741	31.6239	2.13633	22.1973					4.04378	3.37717		SB04G029303	3587_HOM000026	RNA-directed DNA polymerase (reverse transcriptase), related
	Locus_206_Transcript_1_6	34	32	9	23		28.1798	79.5327	8.31103	23.2299					1.49689	1.48288		SB05G001680	3587_HOM000635	Ribosomal protein S5 domain 2-type fold;Ribosomal protein S9; Ribosomal protein S5 domain 2-type fold, subgroup
	Locus_206_Transcript_5_6	36	25	9	34		31.3901	65.3682	8.74351	36.1268					1.05828	2.04679		SB05G001680	3587_HOM000635	Ribosomal protein S5 domain 2-type fold;Ribosomal protein S9; Ribosomal protein S5 domain 2-type fold, subgroup
	Locus_20643_Transcript_1_1	0	5	4	20		0.001	34.1926	10.1634	55.5797					15.0614	2.45118		ZM07G00750	3587_HOM000547	Protein of unknown function DUF538
	Locus_20891_Transcript_3_5	6	14	10	28		2.63072	18.4072	4.88513	14.9604					2.80674	1.61467		SB03G008200	3587_HOM000047	Armadillo;U box domain; Armadillo-like helica
	Locus_20891_Transcript_4_5	7	12	7	20		3.0832	15.8497	3.43523	10.7348					2.36196	1.64382		SB03G008200	3587_HOM000047	Armadillo;U box domain; Armadillo-like helica
	Locus_20891_Transcript_5_5	8	11	6	23		6.40111	26.3934	5.34897	22.4261					2.04378	2.06785		SB03G008200	3587_HOM000047	Armadillo;U box domain; Armadillo-like helica
	Locus_20956_Transcript_1_1	5	8	5	19		3.629	17.4118	4.04335	16.8047					2.26242	2.05525		SB04G005410	3587_HOM000568	Uncharacterised conserved protein UCP015417, vWA;von Willebrand factor, type A
	Locus_20959_Transcript_4_8	32	1	85	44		13.6879	1.2827	40.5097	22.9351					-3.41565	-0.820712		OSINDICA_02G35360	3587_HOM000156	Protein kinase-like domain;ABC-1
	Locus_2105_Transcript_1_1	38	39	8	26		47.3444	145.709	11.1053	39.4747					1.62183	1.82969		null		Unavailable
	Locus_211_Transcript_1_2	280	226	666	789		210.355	509.143	557.471	722.325					1.27525	0.373751		ZM05G11760	3587_HOM001299	Aminotransferase, class I/II;Pyridoxal phosphate-dependent transferase, major domain; Pyridoxal phosphate-dependent transferase
	Locus_211_Transcript_2_2	359	289	804	963		255.589	616.995	637.759	835.477					1.27144	0.389588		ZM05G11760	3587_HOM001299	Aminotransferase, class I/II;Pyridoxal phosphate-dependent transferase, major domain; Pyridoxal phosphate-dependent transferase
	Locus_21442_Transcript_1_1	13	21	18	127		13.7643	66.6756	21.2342	163.861					2.27623	2.94801		SB05G027350	3587_HOM000521	Peptidase aspartic, catalytic;Peptidase aspartic; Peptidase A1
	Locus_215_Transcript_22_31	436	41	111	46		492.77	138.956	139.776	63.3543					-1.82628	-1.14161		SB08G004190	3587_HOM104795	ABA/WDS induced protein
	Locus_21524_Transcript_7_8	142	15	83	36		187.635	59.4365	122.196	57.968					-1.65851	-1.07587		ZM04G41340	3587_HOM000808	Helix-loop-helix DNA-binding domain;Helix-loop-helix DNA-binding
	Locus_21531_Transcript_1_1	1	15	1	28		1.15389	51.9031	1.28564	39.3717					5.49124	4.9366		SB03G024480	3587_HOM000814	SPX, N-terminal
	Locus_2169_Transcript_5_13	46	4	46	15		46.008	11.997	51.2609	18.2822					-1.93921	-1.48742		ZM05G21500	3587_HOM000298	KNOX1;ELK; Homeodomain-related
	Locus_2176_Transcript_4_4	84	61	53	78		76.5937	166.794	53.8447	86.6701					1.12277	0.686729		ZM01G04090	3587_HOM003666	Aminotransferase, class V/Cysteine desulfurase; Aminotransferase class-V pyridoxal-phosphate binding site; Pyridoxal phosphate-dependent transferase
	Locus_21769_Transcript_3_6	63	8	77	40		26.4298	10.0642	35.9914	20.4491					-1.39293	-0.815611		BD1G04300	3587_HOM001451	ATPase, AAA+ type, core;Magnesium chelatase, ATPase subunit D; Magnesium chelatase, ChlI subunit
	Locus_21769_Transcript_5_6	49	3	73	38		21.5087	3.9489	35.7021	20.3265					-2.4454	-0.81265		BD1G04300	3587_HOM001451	ATPase, AAA+ type, core;Magnesium chelatase, ATPase subunit D
	Locus_21769_Transcript_6_6	60	7	61	30		25.8754	9.05256	29.3103	15.7659					-1.51519	-0.894599		ZM05G01950	3587_HOM001451	ATPase, AAA+ type, core;Magnesium chelatase, ATPase subunit D; Magnesium chelatase, ChlI subunit
	Locus_218_Transcript_1_1	5	14	4	15		10.5879	88.9008	9.43744	38.7073					3.06978	2.03614		ZM03G28300	3587_HOM000241	Plant lipid transfer protein/Par allergen;Bifunctional inhibitor/plant lipid transfer protein/seed storage
	Locus_21872_Transcript_1_1	3	9	0	12		8.6715	78.0104	0.001	42.2683					3.16931	15.3673		SB08G018650	3587_HOM096323	Ribosomal protein L2;Translation protein SH3-like; Nucleic acid-binding, OB-fold
	Locus_21915_Transcript_1_2	0	6	1	10		0.001	14.037	0.869237	9.50705					13.7769	3.45118		ZM06G01530	3587_HOM000311	Amino acid transporter, transmembrane
	Locus_21915_Transcript_2_2	0	5	0	9		0.001	11.6975	0.001	8.55635					13.5139	13.0628		ZM06G01530	3587_HOM000311	Amino acid transporter, transmembrane
	Locus_2194_Transcript_7_10	182	7	49	13		179.088	20.6552	53.7211	15.5883					-3.11609	-1.78502		SB08G018350	3587_HOM000547	Protein of unknown function DUF538
	Locus_21988_Transcript_1_2	5	12	2	16		11.9196	85.7847	5.31221	46.4807					2.84738	3.12925		SB03G013050	3587_HOM001425	Unavailable
	Locus_21988_Transcript_2_2	10	16	9	25		21.4508	102.92	21.51	65.3499					2.26242	1.60318		SB03G013050	3587_HOM001425	Unavailable
	Locus_22090_Transcript_1_1	180	13	36	10		192.522	41.6954	42.9006	13.0337					-2.20706	-1.71875		SB08G016770	3587_HOM006446	Unavailable
	Locus_22121_Transcript_1_4	13	19	9	65		35.7872	156.846	27.6045	218.051					2.13184	2.98169		null		Unavailable
	Locus_22121_Transcript_4_4	14	25	16	68		34.9607	187.21	44.517	206.929					2.42085	2.21671		null		Unavailable
	Locus_22249_Transcript_1_2	95	4	469	176		33.5284	4.23337	184.423	75.6942					-2.98551	-1.28477		OSINDICA_01G20390	3587_HOM001362	SecA DEAD-like;SecA Wing/Scaffold; SecA protein, conserved site
	Locus_2232_Transcript_11_11	87	48	67	95		21.2124	35.0954	18.2012	28.2264					0.726369	0.633014		BD4G03230	3587_HOM000301	NB-ARC;Leucine-rich repeat; Powdery mildew resistance protein, RPW8 domain
	Locus_22426_Transcript_1_3	1	5	2	16		1.87391	28.0967	4.17572	36.5367					3.90628	3.12925		SB01G049030	3587_HOM000011	aminocyclopropane-1-carboxylate oxidase
	Locus_22426_Transcript_2_3	0	7	0	9		0.001	38.5237	0.001	20.1278					15.2335	14.2969		SB01G049030	3587_HOM000011	aminocyclopropane-1-carboxylate oxidase
	Locus_22426_Transcript_3_3	0	5	1	11		0.001	28.0967	2.08786	25.119					14.7781	3.58868		SB01G049030	3587_HOM000011	aminocyclopropane-1-carboxylate oxidase
	Locus_22489_Transcript_1_1	3	40	4	30		4.31418	172.494	6.409	52.5726					5.32132	3.03614		SB03G033100	3587_HOM001187	Pyridoxal phosphate phosphatase-related;HAD-superfamily hydrolase, subfamily IB, PSPase-like; Pyridoxal phosphate phosphatase, PHOSPHO2
	Locus_2276_Transcript_1_7	13	13	9	25		8.24951	24.738	6.36328	19.3324					1.58435	1.60318		BD2G25210	3587_HOM001399	Rab GTPase activator;GDP dissociation inhibitor; Rab GDI protein
	Locus_22847_Transcript_1_2	18	20	8	24		81.6141	271.932	40.4144	132.607					1.73635	1.71421		SB10G027470	3587_HOM122373	Ubiquitin;Ubiquitin supergroup; Ubiquitin subgroup
	Locus_2285_Transcript_1_1	28	77	19	47		26.0029	214.433	19.6594	53.1891					3.04378	1.43591		ZM06G29090	3587_HOM000398	Zinc finger, CCCH-type
	Locus_2301_Transcript_1_1	9	18	4	28		26.0145	156.021	12.8821	98.6261					2.58435	2.9366		SB05G022940	3587_HOM001672	Pathogenesis-related protein PR
	Locus_23499_Transcript_1_1	4	11	31	64		4.54749	37.5009	39.267	88.6652					3.04378	1.17505		ZM02G42550	3587_HOM000002	BRASSINOSTEROID INSENSITIVE 1-associated receptor kinase 1
	Locus_23739_Transcript_1_1	0	5	3	22		0.001	28.749	6.409	51.4043					14.8112	3.00372		SB07G023210	3587_HOM000190	Patatin;Acyl transferase/acyl hydrolase/lysophospholipase
	Locus_23865_Transcript_12_12	0	5	4	30		0.001	3.37204	1.0023	8.22181					11.7194	3.03614		SB02G029490	3587_HOM002572	Unavailable
	Locus_23865_Transcript_7_12	2	7	6	25		0.450673	4.73005	1.50638	6.86486					3.39171	2.18814		SB02G029490	3587_HOM002572	Unavailable
	Locus_23942_Transcript_1_2	18	21	18	45		11.6853	40.8814	13.0195	35.5994					1.80674	1.45118		SB03G028620	3587_HOM000078	Cytochrome P450;Cytochrome P450, E-class, group I; Cytochrome P450, conserved site
	Locus_24021_Transcript_1_1	1	5	3	15		4.64337	69.6211	15.5206	84.8762					3.90628	2.45118		SB03G045490	3587_HOM000021	endo-1,3-beta-glucosidase, basic
	Locus_2424_Transcript_2_6	19	18	20	39		28.7161	81.5795	33.6787	71.8286					1.50635	1.09272		SB01G005570	3587_HOM115106	Ubiquitin-conjugating enzyme/RWD-like;Ubiquitin-conjugating enzyme, E2
	Locus_243_Transcript_1_2	137	108	118	151		99.8106	235.948	95.7837	134.058					1.24121	0.485009		SB09G030570	3587_HOM000605	Protein of unknown function DUF1637;Cupin, RmlC-type
	Locus_243_Transcript_2_2	182	111	145	222		132.595	242.502	117.7	197.092					0.870972	0.743754		SB09G030570	3587_HOM000605	Protein of unknown function DUF1637;Cupin, RmlC-type
	Locus_2430_Transcript_3_7	4	7	20	38		3.82531	20.0744	21.3103	44.2845					2.39171	1.05525		SB02G039190	3587_HOM001345	Tify;CCT domain-like
	Locus_24380_Transcript_1_1	28	38	35	65		30.0591	122.331	41.8638	85.0338					2.02492	1.02233		SB03G007270	3587_HOM000711	Lateral organ boundaries, LOB
	Locus_24504_Transcript_1_1	45	31	22	59		21.3496	44.1038	11.6293	34.1107					1.04669	1.55246		ZM05G22410	3587_HOM000595	Chloride channel plant CLC;Cystathionine beta-synthase, core; Chloride channel, core
	Locus_2451_Transcript_5_6	23	73	196	292		26.4603	251.841	251.233	409.365					3.25061	0.704362		SB09G001210	3587_HOM000272	Basic 30 kDa endochitinase
	Locus_24711_Transcript_10_12	14	30	18	36		8.73075	56.1024	12.5069	27.3582					2.68389	1.12925		SB08G023150	3587_HOM000117	ATPase, AAA-type, core;ATPase, AAA+ type, core; ATPase, AAA-type, conserved site
	Locus_24711_Transcript_3_12	5	14	6	29		3.11812	26.1811	4.16896	22.0385					3.06978	2.40227		SB08G023150	3587_HOM000117	ATPase, AAA-type, core;ATPase, AAA+ type, core; ATPase, AAA-type, conserved site
	Locus_24711_Transcript_4_12	1	6	0	12		1.10535	19.8879	0.001	16.1638					4.16931	13.9805		SB08G023150	3587_HOM000117	ATPase, AAA-type, core;ATPase, AAA+ type, core; ATPase, AAA-type, conserved site
	Locus_24711_Transcript_9_12	12	17	9	66		7.4835	31.7914	6.25345	50.1566					2.08685	3.00372		SB08G023150	3587_HOM000117	ATPase, AAA-type, core;ATPase, AAA+ type, core; ATPase, AAA-type, conserved site
	Locus_248_Transcript_6_10	19	24	26	63		13.8423	52.433	21.1049	55.9316					1.92139	1.40609		SB01G045060	3587_HOM127289	Unavailable
	Locus_248_Transcript_7_10	25	31	27	73		19.1171	71.0853	23.0037	68.0245					1.89469	1.56418		SB01G045060	3587_HOM127289	Unavailable
	Locus_248_Transcript_8_10	23	20	24	47		17.8474	46.5387	20.7497	44.4432					1.38272	1.09887		SB01G045060	3587_HOM127289	Unavailable
	Locus_24805_Transcript_2_5	27	0	44	18		16.6582	0.001	30.2461	13.5331					-14.0239	-1.16026		SB04G005900	3587_HOM002780	RNA-metabolising metallo-beta-lactamase;MYB-like; Beta-lactamase-like
	Locus_25147_Transcript_1_1	0	13	0	11		0.001	44.8039	0.001	15.406					15.4513	13.9112		SB01G032880	3587_HOM000814	SPX, N-terminal
	Locus_25297_Transcript_2_2	1	6	0	8		4.51641	81.2609	0.001	44.0295					4.16931	15.4262		null		Unavailable
	Locus_25367_Transcript_1_2	26	26	17	47		30.1215	90.326	21.9435	66.3531					1.58435	1.59637		ZM07G15270	3587_HOM004038	Ctr copper transporter
	Locus_2550_Transcript_3_4	8	10	2	18		5.88772	22.0696	1.63999	16.1432					1.90628	3.29917		SB02G028960	3587_HOM002854	Unavailable
	Locus_2550_Transcript_4_4	14	18	5	20		12.3469	47.6036	4.91308	21.4942					1.94692	2.12925		SB02G028960	3587_HOM002854	Unavailable
	Locus_25598_Transcript_1_1	35	2	100	57		13.4576	2.30604	42.8404	26.7076					-2.54493	-0.681719		SB10G004560	3587_HOM001507	SET domain;SANT, DNA-binding
	Locus_2564_Transcript_1_9	1	13	1	15		0.806276	31.4314	0.898333	14.7379					5.28479	4.03614		SB05G008470	3587_HOM000037	Peptidase aspartic, catalytic;Peptidase aspartic; Peptidase A1
	Locus_2564_Transcript_6_9	3	12	3	17		2.36603	28.3803	2.63617	16.3384					3.58435	2.63175		SB05G008470	3587_HOM000037	Peptidase aspartic, catalytic;Peptidase aspartic; Peptidase A1
	Locus_2564_Transcript_7_9	3	12	1	9		2.56933	30.8189	0.95423	9.39297					3.58435	3.29917		SB05G008470	3587_HOM000037	Peptidase aspartic, catalytic;Peptidase aspartic; Peptidase A1
	Locus_2564_Transcript_8_9	3	7	0	16		2.30779	16.1476	0.001	14.9987					2.80674	13.8726		SB05G008470	3587_HOM000037	Peptidase aspartic, catalytic;Peptidase aspartic; Peptidase A1
	Locus_2588_Transcript_2_2	43	32	28	141		35.6647	79.5898	25.8751	142.512					1.15809	2.46144		ZM03G36940	3587_HOM001807	Tetrapyrrole methylase;Uroporphiryn-III C-methyltransferase, conserved site; Tetrapyrrole methylase, subdomain 2
	Locus_259_Transcript_30_32	2305	462	650	450		2197.07	1320.54	690.302	522.692					-0.734452	-0.401267		OS03G08050	3587_HOM000248	Translation elongation factor EF1A, eukaryotic/archaeal;Translation elongation factor EFTu/EF1A, C-terminal; Translation elongation factor EFTu/EF1A
	Locus_2590_Transcript_10_11	5	14	3	54		3.57293	29.9999	2.38852	47.0229					3.06978	4.29917		ZM03G33250	3587_HOM000677	Allinase, C-terminal;EGF-like, alliinase; Pyridoxal phosphate-dependent transferase, major domain
	Locus_2590_Transcript_6_11	7	14	4	38		5.04576	30.2617	3.21249	33.379					2.58435	3.37717		ZM03G33250	3587_HOM000677	Allinase, C-terminal;EGF-like, alliinase; Pyridoxal phosphate-dependent transferase, major domain
	Locus_26_Transcript_1_5	372	220	176	285		310.771	551.133	163.819	290.137					0.826551	0.824634		SB01G013390	3587_HOM000109	HSP40/DnaJ peptide-binding;Heat shock protein DnaJ; Heat shock protein DnaJ, conserved site
	Locus_26_Transcript_2_5	514	255	303	352		367.524	546.764	241.39	306.709					0.573079	0.345505		SB01G013390	3587_HOM000109	HSP40/DnaJ peptide-binding;Heat shock protein DnaJ; Heat shock protein DnaJ, conserved site
	Locus_26_Transcript_3_5	513	284	282	393		363.661	603.719	222.732	339.494					0.731283	0.608082		SB01G013390	3587_HOM000109	HSP40/DnaJ peptide-binding;Heat shock protein DnaJ; Heat shock protein DnaJ, conserved site
	Locus_26_Transcript_4_5	560	279	294	374		396.735	592.726	232.067	322.883					0.579189	0.47647		SB01G013390	3587_HOM000109	HSP40/DnaJ peptide-binding;Heat shock protein DnaJ; Heat shock protein DnaJ, conserved site
	Locus_26_Transcript_5_5	541	274	299	405		383.745	582.818	236.304	350.075					0.602898	0.567024		SB01G013390	3587_HOM000109	HSP40/DnaJ peptide-binding;Heat shock protein DnaJ; Heat shock protein DnaJ, conserved site
	Locus_26446_Transcript_3_5	40	26	26	74		10.8411	21.1311	7.85126	24.4402					0.962862	1.63826		SB06G016860	3587_HOM000020	Proteinase inhibitor I9, subtilisin propeptide;Peptidase S8/S53, subtilisin/kexin/sedolisin; Protease-associated PA
	Locus_26446_Transcript_5_5	41	30	24	66		11.1121	24.3821	7.24731	21.798					1.13369	1.58868		ZM02G15090	3587_HOM000020	Proteinase inhibitor I9, subtilisin propeptide;Peptidase S8/S53, subtilisin/kexin/sedolisin; Protease-associated PA
	Locus_271_Transcript_7_7	65	39	29	57		85.0147	152.962	42.2603	90.8483					0.847385	1.10416		OS03G58430	3587_HOM000758	Ribosomal protein S15, eukaryotic/archaeal;Ribosomal protein S19/S15
	Locus_27137_Transcript_1_1	9	26	54	92		7.75395	67.1724	51.8356	96.5894					3.11487	0.897922		SB10G024240	3587_HOM006378	Unavailable
	Locus_27625_Transcript_2_3	120	18	320	125		36.4924	16.4146	108.424	46.3225					-1.15262	-1.2269		OSINDICA_06G37850	3587_HOM003317	Metalloenzyme, LuxS/M16 peptidase-like, metal-binding;Peptidase M16, core; Peptidase M16, N-terminal
	Locus_2834_Transcript_1_1	25	19	9	35		25.762	58.7125	10.3332	43.951					1.18842	2.08861		SB01G034390	3587_HOM002750	Branched-chain alpha-ketoacid dehydrogenase kinase/Pyruvate dehydrogenase kinase, mitochondrial;Signal transduction histidine kinase-related protein
	Locus_28542_Transcript_1_2	0	6	1	14		0.001	31.0953	1.92558	29.4846					14.9244	3.9366		SB04G024020	3587_HOM000387	Protein of unknown function Cys-rich
	Locus_28730_Transcript_1_1	77	10	95	52		45.796	17.835	62.9526	37.6878					-1.36051	-0.740168		SB05G022980	3587_HOM000495	RNA-binding, CRM domain
	Locus_29010_Transcript_3_3	1	6	1	10		0.783334	14.094	0.872771	9.5457					4.16931	3.45118		SB06G033870	3587_HOM000012	Plant peroxidase;Peroxidases heam-ligand binding site; Peroxidase, active site
	Locus_291_Transcript_5_6	9	14	9	31		8.11685	37.8626	9.0436	34.0696					2.22178	1.91352		OSINDICA_06G42860	3587_HOM000122	Ubiquitin;Ubiquitin supergroup; Ubiquitin subgroup
	Locus_2941_Transcript_5_10	32	27	35	65		15.4546	39.103	18.8335	38.2546					1.33924	1.02233		ZM01G29850	3587_HOM000278	Amino acid/polyamine transporter I;Cationic amino acid transporter; Amino acid permease domain
	Locus_2942_Transcript_9_15	50	41	21	42		28.4498	69.9569	13.3132	29.1219					1.29805	1.12925		SB02G023230	3587_HOM000010	DNA-binding, integrase-type;Pathogenesis-related transcriptional factor/ERF, DNA-binding
	Locus_2969_Transcript_1_2	9	16	6	26		15.6478	83.4197	11.6229	55.0866					2.41443	2.24472		null		Unavailable
	Locus_2969_Transcript_2_2	3	16	2	14		5.21594	83.4197	3.87432	29.662					3.99939	2.9366		null		Unavailable
	Locus_2974_Transcript_3_3	17	24	40	62		10.8235	45.8211	28.3747	48.1027					2.08185	0.761516		SB01G040920	3587_HOM001440	Aminotransferase, class I/II;Pyridoxal phosphate-dependent transferase, major domain; Pyridoxal phosphate-dependent transferase, major region, subdomain 1
	Locus_2980_Transcript_7_7	28	22	59	92		15.8074	37.2446	37.1115	63.2924					1.23643	0.770166		ZM09G14420	3587_HOM000235	Purple acid phosphatase, N-terminal;Metallophosphoesterase; Fibronectin, type III
	Locus_29810_Transcript_1_1	18	19	49	87		9.27847	29.3694	28.1419	54.6492					1.66235	0.957481		SB02G012940	3587_HOM000294	GTPase effector domain, GED;Dynamin, GTPase region, conserved site; Dynamin GTPase effector
	Locus_299_Transcript_1_10	236	171	158	247		102.58	222.887	76.5177	130.831					1.11956	0.773834		ZM01G04120	3587_HOM000444	YTH domain
	Locus_299_Transcript_10_10	292	155	150	229		134.132	213.51	76.7706	128.188					0.67065	0.739633		ZM01G04120	3587_HOM000444	YTH domain
	Locus_299_Transcript_4_10	157	90	83	143		144.987	249.235	85.4005	160.926					0.781583	0.914079		ZM01G04120	3587_HOM000444	YTH domain
	Locus_299_Transcript_5_10	277	156	185	242		117.357	198.194	87.3283	124.941					0.756011	0.516729		ZM09G28680	3587_HOM000444	YTH domain
	Locus_299_Transcript_7_10	297	202	192	241		118.903	242.507	85.6428	117.575					1.02824	0.457174		ZM09G28680	3587_HOM000444	YTH domain
	Locus_299_Transcript_8_10	145	88	74	105		79.8709	145.358	45.4157	70.4808					0.863873	0.63404		ZM01G04120	3587_HOM000444	YTH domain
	Locus_299_Transcript_9_10	343	190	203	276		157.81	262.139	104.062	154.743					0.732141	0.572436		ZM01G04120	3587_HOM000444	YTH domain
	Locus_30073_Transcript_3_3	46	30	33	62		55.8668	109.258	44.6543	91.759					0.967679	1.03905		SB05G001560	3587_HOM000585	Nucleoside phosphatase GDA1/CD39
	Locus_30159_Transcript_1_1	180	118	107	255		874.437	1719	579.153	1509.58					0.97514	1.38213		SB05G000440	3587_HOM001429	Rossmann-like alpha/beta/alpha sandwich fold;Glutamine amidotransferase, type II; Asparagine synthase, glutamine-hydrolyzing
	Locus_3025_Transcript_3_5	25	19	9	23		23.6345	53.8638	9.47988	26.4969					1.18842	1.48288		SB09G024250	3587_HOM107753	Protein of unknown function DUF250
	Locus_30254_Transcript_1_1	2	17	3	18		1.75049	44.6186	2.92553	19.1983					4.67181	2.71421		ZM07G23550	3587_HOM000006	Receptor like protein kinase
	Locus_30276_Transcript_2_4	328	17	52	21		544.876	84.6856	96.2456	42.5113					-2.68574	-1.17887		SB01G044230	3587_HOM103754	Amine oxidase
	Locus_30276_Transcript_3_4	300	17	52	18		541.969	92.0956	104.667	39.6266					-2.55701	-1.40127		SB01G044230	3587_HOM103754	Amine oxidase
	Locus_3043_Transcript_2_4	214	25	96	54		246.441	86.3329	123.175	75.7799					-1.51326	-0.700828		SB01G038390	3587_HOM000624	Ran binding protein 1;Pleckstrin homology-type; Glycosyl transferase, family 8
	Locus_3043_Transcript_4_4	184	38	101	43		206.344	127.789	126.197	58.763					-0.691284	-1.1027		SB01G038390	3587_HOM000624	Ran binding protein 1;Pleckstrin homology-type; Glycosyl transferase, family 8
	Locus_30582_Transcript_3_5	0	6	2	13		0.001	26.1014	3.23265	22.9815					14.6718	2.82969		ZM07G01220	3587_HOM000169	Allergen V5/Tpx-1 related;Ves allergen; SCP-like extracellular
	Locus_30830_Transcript_7_9	12	13	6	19		10.6236	34.512	5.91827	20.4977					1.69983	1.79221		SB04G004270	3587_HOM119291	Ubiquitin;Ubiquitin supergroup; Ubiquitin subgroup
	Locus_3089_Transcript_1_1	38	33	25	53		34.0586	88.694	24.9653	57.8869					1.38082	1.21331		SB03G031880	3587_HOM002224	Threonine synthase;Pyridoxal phosphate-dependent enzyme, beta subunit; Serine/threonine dehydratase, pyridoxal-phosphate-binding site
	Locus_3122_Transcript_1_3	18	16	7	21		49.2	131.144	21.3179	69.9476					1.41443	1.71421		SB10G028580	3587_HOM000089	Xyloglucan endotransglucosylase/hydrolase protein
	Locus_3127_Transcript_1_1	186	34	132	56		123.807	67.8655	97.8951	45.4237					-0.867346	-1.10779		SB02G028940	3587_HOM003696	GDP-fucose protein O-fucosyltransferase
	Locus_3133_Transcript_1_1	83	75	24	115		303.686	822.895	97.8387	512.749					1.43813	2.38977		SB08G002690	3587_HOM000241	Plant lipid transfer protein/Par allergen;Bifunctional inhibitor/plant lipid transfer protein/seed storage
	Locus_31478_Transcript_2_5	4	7	9	26		2.73333	14.3439	6.85218	21.6505					2.39171	1.65976		SB09G029130	3587_HOM001025	Glutamine amidotransferase type 1;Glutamine amidotransferase class-I, C-terminal; CTP synthase
	Locus_315_Transcript_7_10	118	76	64	102		88.9385	171.774	53.7454	93.6847					0.949635	0.801673		ZM05G20350	3587_HOM001140	Phosphoglycerate kinase, conserved site;Phosphoglycerate kinase, C-terminal; Phosphoglycerate kinase, N-terminal
	Locus_317_Transcript_1_2	543	286	269	438		289.851	457.802	159.985	284.911					0.659413	0.832572		SB01G019280	3587_HOM001021	Lactate dehydrogenase/glycoside hydrolase, family 4, C-terminal;Malate dehydrogenase, NAD/NADP; L-lactate/malate dehydrogenase
	Locus_317_Transcript_2_2	495	248	276	455		346.86	521.12	215.482	388.527					0.587262	0.850446		SB01G019280	3587_HOM001021	Lactate dehydrogenase/glycoside hydrolase, family 4, C-terminal;Malate dehydrogenase, NAD/NADP; L-lactate/malate dehydrogenase
	Locus_3170_Transcript_8_10	29	25	34	56		19.5395	50.5118	25.524	45.9796					1.37023	0.849139		SB03G003140	3587_HOM000219	Phosphofructokinase;Pyrophosphate-dependent phosphofructokinase TP0108
	Locus_31786_Transcript_3_3	78	7	47	19		45.1822	12.1593	30.3336	13.4118					-1.8937	-1.17741		SB07G019320	3587_HOM004471	Peptidyl-prolyl cis-trans isomerase, cyclophilin-type;Cyclophilin-like
	Locus_3179_Transcript_3_9	52	68	33	62		52.1896	204.657	36.9018	75.8286					1.97137	1.03905		null		Unavailable
	Locus_3194_Transcript_1_1	1	17	5	26		2.90503	148.093	16.1835	92.0416					5.67181	2.50776		ZM04G05570	3587_HOM071533	Unavailable
	Locus_320_Transcript_10_10	635	274	280	444		228.363	295.488	112.192	194.579					0.37177	0.79438		ZM04G41390	3587_HOM001655	Catalase, N-terminal;Catalase-like domain, haem-dependent; Catalase-related immune responsive
	Locus_320_Transcript_7_10	480	217	147	267		182.498	247.408	62.2712	123.705					0.439011	0.990271		ZM04G41390	3587_HOM001655	Catalase, N-terminal;Catalase-like domain, haem-dependent; Catalase-related immune responsive
	Locus_3226_Transcript_1_2	0	6	1	9		0.001	11.7397	0.726981	7.15604					13.5191	3.29917		SB06G020220	3587_HOM000005	Cytochrome P450;Cytochrome P450, E-class, group I; Cytochrome P450, conserved site
	Locus_323_Transcript_17_19	271	57	170	88		289.584	182.649	202.399	114.591					-0.664909	-0.820712		ZM01G09370	3587_HOM002587	H/ACA ribonucleoprotein complex, subunit Nhp2, eukaryote;Ribosomal protein L7Ae/L8/Nhp2 family; Ribosomal protein L7Ae/L30e/S12e/Gadd45
	Locus_3235_Transcript_1_3	2	8	20	45		1.34913	16.1826	15.0316	36.991					3.58435	1.29917		SB03G039140	3587_HOM000067	Ankyrin repeat;Ankyrin repeat-containing domain
	Locus_3235_Transcript_3_3	5	13	19	42		3.33969	26.0385	14.1398	34.1858					2.96286	1.27364		SB03G039140	3587_HOM000067	Ankyrin repeat;Ankyrin repeat-containing domain
	Locus_326_Transcript_16_17	418	70	185	99		544.861	273.618	268.68	157.255					-0.993726	-0.772777		ZM04G08520	3587_HOM001163	Ribosomal protein S13/S15, N-terminal;Ribosomal protein S15; S15/NS1, RNA-binding
	Locus_3306_Transcript_1_2	6	9	5	24		6.50769	29.2722	6.04226	31.7211					2.16931	2.39228		SB05G010050	3587_HOM000995	Protein of unknown function DUF1685
	Locus_332_Transcript_2_2	83	48	36	64		64.7535	112.296	31.2925	60.8451					0.794274	0.959322		SB09G017990	3587_HOM000455	Protein of unknown function DUF538
	Locus_33483_Transcript_1_1	20	21	9	32		80.0139	251.937	40.1173	156.008					1.65474	1.95932		OSINDICA_06G42160	3587_HOM021875	Unavailable
	Locus_33616_Transcript_1_1	11	82	15	99		11.8973	265.954	18.0759	130.482					4.48247	2.85171		SB01G039360	3587_HOM000006	Protein of unknown function DUF26;Serine/threonine-protein kinase-like domain; Tyrosine-protein kinase, catalytic domain
	Locus_337_Transcript_5_6	6	31	8	39		6.44123	99.7967	9.56888	51.0203					3.95358	2.41465		ZM07G27050	3587_HOM001666	Ribosomal protein L18e/L15;Ribosomal protein L15, conserved site
	Locus_337_Transcript_6_6	2	10	0	9		2.96082	44.3935	0.001	16.2362					3.90628	13.9869		SB04G004680	3587_HOM001666	Ribosomal protein L18e/L15;Ribosomal protein L15, conserved site
	Locus_3371_Transcript_1_4	35	25	7	24		18.4192	39.453	4.10445	15.3913					1.09892	1.90685		SB04G034980	3587_HOM000020	Proteinase inhibitor I9, subtilisin propeptide;Peptidase S8/S53, subtilisin/kexin/sedolisin; Protease-associated PA
	Locus_3379_Transcript_2_4	8	42	8	37		8.53284	134.335	9.50708	48.0913					3.97667	2.3387		SB05G006880	3587_HOM001534	Chitinase 2
	Locus_3379_Transcript_3_4	11	60	18	47		11.6361	190.327	21.2148	60.5859					4.03181	1.51391		SB05G006880	3587_HOM001534	Chitinase 2
	Locus_3379_Transcript_4_4	11	54	23	50		12.0438	177.296	28.0576	66.7114					3.87981	1.24954		SB05G006880	3587_HOM001534	Chitinase 2
	Locus_33881_Transcript_1_2	1	5	2	18		1.73343	25.9905	3.8627	38.0225					3.90628	3.29917		SB06G032180	3587_HOM003156	Alternative oxidase
	Locus_3400_Transcript_2_2	108	58	39	119		85.6445	137.924	34.4583	114.996					0.687444	1.73866		SB08G016400	3587_HOM000011	aminocyclopropane-1-carboxylate oxidase
	Locus_341_Transcript_1_3	68	48	78	105		89.8533	190.197	114.835	169.073					1.08185	0.558091		ZM06G25790	3587_HOM000068	Ubiquitin-conjugating enzyme/RWD-like;Ubiquitin-conjugating enzyme, E2
	Locus_341_Transcript_2_3	46	32	70	107		54.4373	113.56	92.2975	154.306					1.06079	0.741431		ZM06G25790	3587_HOM000068	Ubiquitin-conjugating enzyme/RWD-like
	Locus_34102_Transcript_2_2	2	6	4	19		1.56773	14.1036	3.49345	18.1491					3.16931	2.37717		SB03G028680	3587_HOM000078	Cytochrome P450;Cytochrome P450, E-class, group I; Cytochrome P450, conserved site
	Locus_3441_Transcript_2_7	4	9	2	15		3.21613	21.6997	1.79167	14.6969					2.75428	3.03614		SB04G000390	3587_HOM005458	Ankyrin repeat;Ankyrin repeat-containing domain
	Locus_34432_Transcript_1_2	9	13	8	21		10.1818	44.1024	10.0838	28.9509					2.11487	1.52156		ZM06G25280	3587_HOM001413	Protein of unknown function DUF1218
	Locus_3482_Transcript_1_6	1	5	1	9		1.3094	19.6327	1.4589	14.3607					3.90628	3.29917		SB01G033540	3587_HOM004456	Hydroxyisourate hydrolase;Oxo-4-hydroxy-4-carboxy-5-ureidoimidazoline decarboxylase; Bifunctional hydroxyisourate hydrolase/2-oxo-4-hydroxy-4-carboxy-5
	Locus_34930_Transcript_1_1	0	7	5	21		0.001	50.9872	13.5316	62.1593					15.6378	2.19964		null		Unavailable
	Locus_35241_Transcript_1_2	0	7	16	32		0.001	19.2925	16.3842	35.8396					14.2357	1.12925		SB01G019200	3587_HOM000642	MATH;TRAF-like
	Locus_3538_Transcript_1_1	5	236	34	309		8.57715	1214.01	64.9839	645.941					7.14507	3.31325		SB08G022440	3587_HOM000107	Thaumatin, pathogenesis-related
	Locus_3578_Transcript_1_4	5	23	8	68		9.14715	126.177	16.3065	151.595					3.78598	3.21671		SB09G001060	3587_HOM001929	Proteinase inhibitor I13, potato inhibitor I
	Locus_3578_Transcript_2_4	1	5	0	11		2.26706	33.9915	0.001	30.389					3.90628	14.8913		SB09G001050	3587_HOM001929	Proteinase inhibitor I13, potato inhibitor I
	Locus_3578_Transcript_3_4	1	9	2	20		2.27598	61.4255	5.07169	55.4703					4.75428	3.45118		SB09G001050	3587_HOM001929	Proteinase inhibitor I13, potato inhibitor I
	Locus_3578_Transcript_4_4	6	27	6	43		10.495	141.623	11.6933	91.656					3.75428	2.97055		SB09G001050	3587_HOM001929	Proteinase inhibitor I13, potato inhibitor I
	Locus_3617_Transcript_4_6	109	19	93	27		38.7295	20.2445	36.8173	11.6907					-0.935906	-1.65502		SB01G004210	3587_HOM000082	Zinc finger, RING-type
	Locus_36201_Transcript_3_5	72	3	51	15		65.138	8.1388	51.4074	16.5369					-3.00061	-1.63629		SB01G049450	3587_HOM003176	Peroxisomal biogenesis factor 11
	Locus_3625_Transcript_1_1	143	80	99	149		277.41	465.387	213.981	352.236					0.746407	0.719059		ZM06G27140	3587_HOM001723	Ribosomal protein L7Ae/L30e/S12e/Gadd45;Ribosomal protein L30e
	Locus_3657_Transcript_6_11	12	14	15	45		14.9832	52.4188	20.8673	68.4692					1.80674	1.71421		ZM04G06530	3587_HOM000634	Light chain 3 (LC
	Locus_3662_Transcript_1_8	137	8	46	19		393.051	68.8264	147.041	66.4267					-2.51368	-1.14639		BD3G27278	3587_HOM000775	Ribulose bisphosphate carboxylase, large subunit, C-terminal;Ribulose bisphosphate carboxylase, large subunit, N-terminal; Ribulose bisphosphate carboxylase
	Locus_3704_Transcript_1_3	13	23	11	28		8.54497	45.3348	8.05589	22.4278					2.40747	1.47717		SB09G002390	3587_HOM000398	Ankyrin repeat;Ankyrin repeat-containing domain; Zinc finger, CCCH-type
	Locus_3707_Transcript_9_9	51	33	17	36		28.9618	56.1961	10.7562	24.9126					0.956319	1.21171		SB04G035670	3587_HOM000451	TMS membrane protein/tumour differentially expressed protein
	Locus_3708_Transcript_1_6	606	47	207	70		1418.33	329.869	539.796	199.648					-2.10423	-1.43496		SB03G025520	3587_HOM002603	Thiamine biosynthesis Thi4 protein
	Locus_3708_Transcript_2_6	699	44	199	111		1491.11	281.464	472.977	288.548					-2.40537	-0.712961		SB03G025520	3587_HOM002603	Thiamine biosynthesis Thi4 protein
	Locus_3708_Transcript_3_6	583	38	179	60		1255.24	245.346	429.403	157.424					-2.35507	-1.44768		SB03G025520	3587_HOM002603	Thiamine biosynthesis Thi4 protein
	Locus_3708_Transcript_4_6	616	42	181	62		1314.06	268.671	430.196	161.171					-2.29012	-1.4164		SB03G025520	3587_HOM002603	Thiamine biosynthesis Thi4 protein
	Locus_3708_Transcript_5_6	716	74	245	147		1595.07	494.35	608.115	399.065					-1.69001	-0.607718		SB03G025520	3587_HOM002603	Thiamine biosynthesis Thi4 protein
	Locus_3708_Transcript_6_6	613	37	196	66		1317.38	238.446	469.311	172.845					-2.46594	-1.44107		SB03G025520	3587_HOM002603	Thiamine biosynthesis Thi4 protein
	Locus_371_Transcript_1_2	55	34	27	58		46.0471	85.3602	25.1859	59.1736					0.890454	1.23234		SB03G033090	3587_HOM000211	[NiFe]-hydrogenase-3-type complex, small subunit/NADH:quinone oxidoreductase, subunit NuoB;NADH:ubiquinone oxidoreductase-like, 20kDa subunit
	Locus_371_Transcript_2_2	77	55	39	64		64.7472	138.685	36.5383	65.58					1.09892	0.843845		ZM08G26720	3587_HOM000211	[NiFe]-hydrogenase-3-type complex, small subunit/NADH:quinone oxidoreductase, subunit NuoB;NADH:ubiquinone oxidoreductase-like, 20kDa subunit
	Locus_3716_Transcript_2_5	91	49	210	268		138.805	224.128	356.892	498.149					0.691266	0.481091		SB04G037290	3587_HOM112621	Unavailable
	Locus_3716_Transcript_3_5	105	62	151	324		191.787	339.592	307.298	721.166					0.824301	1.23069		ZM04G25050	3587_HOM006509	Cystathionine beta-synthase, core
	Locus_3716_Transcript_4_5	114	76	186	338		210.554	420.93	382.759	760.74					0.999388	0.990968		SB04G037290	3587_HOM112621	Unavailable
	Locus_3716_Transcript_5_5	141	89	269	435		260.422	492.931	553.56	979.059					0.920533	0.822657		ZM04G25050	3587_HOM006509	Cystathionine beta-synthase, core
	Locus_3727_Transcript_1_1	11	19	11	46		6.89707	35.7242	7.68455	35.1472					2.37285	2.19338		ZM07G23520	3587_HOM000006	Receptor like protein kinase
	Locus_37656_Transcript_1_1	2	7	12	29		1.48421	15.5776	9.92203	26.2255					3.39171	1.40227		null		Unavailable
	Locus_37821_Transcript_1_1	1	12	1	23		4.14409	149.124	4.61724	116.15					5.16931	4.65281		SB10G002890	3587_HOM001676	Early nodulin 93 ENOD93 protein
	Locus_37823_Transcript_3_3	100	88	37	133		500.52	1320.81	206.337	811.211					1.39993	1.97508		ZM04G39560	3587_HOM000122	Ubiquitin;Ubiquitin supergroup; Ubiquitin subgroup
	Locus_38544_Transcript_1_3	1	14	0	8		0.762665	32.0183	0.001	7.43507					5.39171	12.8601		OS03G20260	3587_HOM000037	Peptidase aspartic, catalytic;Peptidase aspartic; Peptidase aspartic
	Locus_389_Transcript_1_2	13	134	128	212		11.3182	349.846	124.165	224.922					4.95	0.857168		SB03G026000	3587_HOM000011	aminocyclopropane-1-carboxylate oxidase
	Locus_389_Transcript_2_2	8	134	155	218		6.99139	351.168	150.924	232.162					5.65044	0.621307		SB03G026000	3587_HOM000011	aminocyclopropane-1-carboxylate oxidase
	Locus_39_Transcript_1_4	6	15	7	21		12.3438	92.5391	16.0453	52.6474					2.90628	1.71421		null		Unavailable
	Locus_39_Transcript_2_4	6	12	8	28		10.9766	65.8316	16.3065	62.4216					2.58435	1.9366		null		Unavailable
	Locus_39_Transcript_3_4	83	48	37	76		176.082	305.362	87.4565	196.477					0.794274	1.16772		null		Unavailable
	Locus_398_Transcript_2_3	104	58	44	112		64.0622	107.136	30.1978	84.0713					0.741892	1.47717		ZM01G33410	3587_HOM001127	Ribosomal protein L32e
	Locus_4008_Transcript_1_6	19	27	27	64		9.07761	38.6829	14.3726	37.2614					2.09131	1.37436		SB01G002180	3587_HOM000599	Ferredoxin;Ferredoxin [2Fe-2S], plant; Beta-grasp fold, ferredoxin-type
	Locus_4008_Transcript_2_6	17	19	26	46		24.0286	80.5324	40.9455	79.2316					1.74482	0.95237		SB01G002180	3587_HOM000599	Ferredoxin;Ferredoxin [2Fe-2S], plant; Beta-grasp fold, ferredoxin-type
	Locus_4008_Transcript_5_6	24	26	39	64		11.4712	37.2656	20.769	37.2768					1.69983	0.843845		SB01G002180	3587_HOM000599	Ferredoxin;Ferredoxin [2Fe-2S], plant; Beta-grasp fold, ferredoxin-type
	Locus_4008_Transcript_6_6	18	27	27	48		25.6301	115.286	42.8346	83.2874					2.16931	0.959322		SB01G002180	3587_HOM000599	Ferredoxin;Ferredoxin [2Fe-2S], plant; Beta-grasp fold, ferredoxin-type
	Locus_40216_Transcript_1_1	1	9	3	14		4.41298	119.1	14.7505	75.2871					4.75428	2.35164		SB08G017240	3587_HOM000327	NADPH oxidase Respiratory burst;Ferric reductase-like transmembrane component, N-terminal; Riboflavin synthase-like beta-barrel
	Locus_4024_Transcript_1_1	398	58	230	125		350.738	153.273	225.829	134.236					-1.19429	-0.750458		SB03G006340	3587_HOM000969	Mitochondrial glycoprotein
	Locus_4076_Transcript_1_1	15	16	15	39		16.92	54.1211	18.8519	53.6086					1.67746	1.50776		SB03G000970	3587_HOM003368	Mpv17/PMP22
	Locus_4197_Transcript_5_10	8	10	14	37		6.84142	25.6445	13.3395	38.5584					1.90628	1.53135		SB03G042630	3587_HOM001427	Ribonuclease T2, active site;Ribonuclease T2; Pentatricopeptide repeat
	Locus_4197_Transcript_6_10	5	9	15	35		4.0884	22.068	13.6656	34.8749					2.43235	1.35164		SB03G042630	3587_HOM001427	Ribonuclease T2, active site;Ribonuclease T2; Pentatricopeptide repeat
	Locus_4219_Transcript_2_2	98	17	71	35		77.5018	40.3155	62.5601	33.7299					-0.942897	-0.891217		SB03G027110	3587_HOM001548	Hyaluronan/mRNA binding protein
	Locus_42191_Transcript_1_1	41	28	10	35		156.968	321.456	42.656	163.288					1.03415	1.9366		null		Unavailable
	Locus_42238_Transcript_2_4	0	5	4	16		0.001	15.6177	4.6422	20.3091					13.9309	2.12925		SB09G026410	3587_HOM003148	Heat shock protein DnaJ;Heat shock protein DnaJ, conserved site; Heat shock protein DnaJ, N-terminal
	Locus_42238_Transcript_4_4	2	7	13	44		1.64233	17.2372	11.894	44.0295					3.39171	1.88824		SB09G026410	3587_HOM003148	Heat shock protein DnaJ;Molecular chaperone, heat shock protein, Hsp40, DnaJ; Heat shock protein DnaJ, N-terminal
	Locus_425_Transcript_3_3	149	83	65	124		86.5698	144.609	42.0772	87.7935					0.740221	1.06108		SB06G016800	3587_HOM001281	Plectin/S10, N-terminal
	Locus_4263_Transcript_4_6	15	22	11	30		8.18452	35.9966	6.68726	19.9473					2.13689	1.57671		ZM07G00340	3587_HOM000040	Major facilitator superfamily, general substrate transporter;Sugar/inositol transporter; Sugar/inositol transporter
	Locus_4263_Transcript_5_6	15	21	8	26		8.07402	33.8965	4.7978	17.0543					2.06978	1.82969		ZM07G00340	3587_HOM000040	Major facilitator superfamily, general substrate transporter;Sugar/inositol transporter; Sugar/inositol transporter
	Locus_4274_Transcript_2_2	25	24	7	42		41.71	120.074	13.0122	85.3906					1.52546	2.71421		ZM08G21350	3587_HOM000895	Preprotein translocase Sec, Sec61-beta subunit, eukarya;Preprotein translocase Sec, Sec61-beta subunit
	Locus_4309_Transcript_1_1	0	11	17	83		0.001	52.1017	29.9174	159.757					15.669	2.41682		ZM06G02390	3587_HOM000810	Mannose-binding lectin;Plant disease resistance response protein
	Locus_4344_Transcript_1_2	125	8	56	26		167.274	32.1031	83.4951	42.3988					-2.38143	-0.977668		SB10G003200	3587_HOM001944	FeS cluster insertion, C-terminal, conserved site;FeS cluster insertion; FeS cluster biogenesis
	Locus_4344_Transcript_2_2	94	13	59	24		147.868	61.3234	103.407	46.0064					-1.2698	-1.16843		SB10G003200	3587_HOM001944	FeS cluster insertion, C-terminal, conserved site;FeS cluster insertion; FeS cluster biogenesis
	Locus_4346_Transcript_3_5	43	49	98	135		27.915	95.3899	70.8841	106.798					1.7728	0.591353		ZM10G26440	3587_HOM000253	Pyruvate/Phosphoenolpyruvate kinase, catalytic core;Pyruvate kinase; Pyruvate kinase, barrel
	Locus_4351_Transcript_1_1	152	90	48	101		97.689	173.453	34.3714	79.1014					0.828276	1.2025		OS07G43960	3587_HOM001414	Protein of unknown function DUF1618
	Locus_4372_Transcript_1_4	35	67	63	109		28.4178	163.13	56.9924	107.848					2.52116	0.920152		ZM04G17800	3587_HOM001342	Beta-1,4-mannosyl-glycoprotein 4-beta-N-acetylglucosaminyltransferase
	Locus_4372_Transcript_2_4	36	74	58	122		29.1683	179.795	52.3589	120.456					2.62388	1.202		ZM04G17800	3587_HOM001342	Beta-1,4-mannosyl-glycoprotein 4-beta-N-acetylglucosaminyltransferase
	Locus_4372_Transcript_3_4	39	48	70	124		25.191	92.9733	50.3769	97.6029					1.88391	0.954161		ZM04G17800	3587_HOM001342	Beta-1,4-mannosyl-glycoprotein 4-beta-N-acetylglucosaminyltransferase
	Locus_4372_Transcript_4_4	31	62	64	130		24.9598	149.695	57.4133	127.551					2.58435	1.15162		ZM04G17800	3587_HOM001342	Beta-1,4-mannosyl-glycoprotein 4-beta-N-acetylglucosaminyltransferase
	Locus_442_Transcript_12_14	118	110	97	202		37.4298	104.632	34.2816	78.0814					1.48307	1.18755		BD1G09260	3587_HOM000181	Lipoxygenase, LH2;Lipoxygenase, C-terminal; Lipoxygenase, plant
	Locus_442_Transcript_13_14	227	239	313	402		81.9156	258.628	125.846	176.778					1.65867	0.49028		OSINDICA_03G50910	3587_HOM000181	Lipoxygenase, LH2;Lipoxygenase, C-terminal; Lipoxygenase, plant
	Locus_442_Transcript_14_14	16	22	32	54		5.75761	23.7401	12.83	23.6797					2.04378	0.884135		SB01G011030	3587_HOM122938	Lipoxygenase, LH2;Lipoxygenase, C-terminal; Lipoxygenase, plant
	Locus_442_Transcript_5_14	17	15	16	44		6.33228	16.7548	6.64026	19.9722					1.40378	1.58868		OSINDICA_03G47690	3587_HOM000181	Lipoxygenase, LH2;Lipoxygenase, C-terminal; Lipoxygenase, plant
	Locus_442_Transcript_7_14	96	107	91	175		30.4013	101.611	32.1082	67.5336					1.74085	1.07266		OS03G49350	3587_HOM000181	Lipoxygenase, LH2;Lipoxygenase, C-terminal; Lipoxygenase, plant
	Locus_44936_Transcript_2_6	14	22	14	42		10.7411	50.615	11.9674	39.2672					2.23643	1.71421		SB02G011210	3587_HOM000936	Di-trans-poly-cis-decaprenylcistransferase-like, conserved site;Di-trans-poly-cis-decaprenylcistransferase-like
	Locus_44936_Transcript_4_6	10	12	11	50		7.2353	26.036	8.86753	44.0846					1.84738	2.31367		SB02G011210	3587_HOM000936	Di-trans-poly-cis-decaprenylcistransferase-like, conserved site;Di-trans-poly-cis-decaprenylcistransferase-like
	Locus_44936_Transcript_5_6	0	4	2	12		0.001	25.8259	4.7978	31.4848					14.6565	2.71421		SB02G011210	3587_HOM000936	Di-trans-poly-cis-decaprenylcistransferase-like, conserved site;Di-trans-poly-cis-decaprenylcistransferase-like
	Locus_44936_Transcript_6_6	16	17	17	38		13.2326	42.1611	15.6649	38.2975					1.67181	1.28971		SB02G011210	3587_HOM000936	Di-trans-poly-cis-decaprenylcistransferase-like, conserved site;Di-trans-poly-cis-decaprenylcistransferase-like
	Locus_44986_Transcript_1_2	0	4	0	9		0.001	17.5108	0.001	16.0107					14.096	13.9668		ZM01G10690	3587_HOM002125	deoxystreptamine N-acetyl-D-glucosaminyltransferase
	Locus_4506_Transcript_1_1	15	15	10	25		16.5962	49.7674	12.3274	33.7068					1.58435	1.45118		null		Unavailable
	Locus_451_Transcript_1_2	124	109	101	216		90.9701	239.795	82.5566	193.104					1.39834	1.22592		SB01G006330	3587_HOM000392	Actin-binding, cofilin/tropomyosin type
	Locus_451_Transcript_2_2	121	114	105	202		85.0457	240.275	82.2262	173.013					1.49838	1.07321		SB01G006330	3587_HOM000392	Actin-binding, cofilin/tropomyosin type
	Locus_45117_Transcript_2_2	4	7	0	11		15.5717	81.7169	0.001	52.1831					2.39171	15.6713		SB08G002670	3587_HOM000241	Plant lipid transfer protein/Par allergen;Bifunctional inhibitor/plant lipid transfer protein/seed storage
	Locus_45535_Transcript_1_2	23	22	3	27		105.947	303.892	15.3969	151.56					1.52022	3.29917		null		Unavailable
	Locus_4576_Transcript_1_6	111	14	88	46		86.0176	32.5334	75.9802	43.4393					-1.40271	-0.806622		SB03G033140	3587_HOM001548	Hyaluronan/mRNA binding protein
	Locus_4576_Transcript_2_6	100	17	82	42		89.6975	45.7263	81.9497	45.9082					-0.972043	-0.835987		SB03G033140	3587_HOM001548	Hyaluronan/mRNA binding protein
	Locus_4576_Transcript_3_6	98	17	100	41		60.9509	31.7059	69.2959	31.0741					-0.942897	-1.15706		SB03G033140	3587_HOM001548	Hyaluronan/mRNA binding protein
	Locus_4576_Transcript_5_6	92	14	87	45		66.0686	30.149	69.6113	39.3804					-1.13186	-0.821843		SB03G033140	3587_HOM001548	Hyaluronan/mRNA binding protein
	Locus_4576_Transcript_6_6	93	9	76	42		66.7867	19.3815	60.8099	36.7551					-1.78488	-0.726363		SB03G033140	3587_HOM001548	Hyaluronan/mRNA binding protein
	Locus_4629_Transcript_2_6	83	13	56	26		42.2008	19.8209	31.7237	16.1093					-1.09025	-0.977668		SB01G020010	3587_HOM000425	Chaperonin Cpn60;Chaperonin Cpn60, conserved site; Chaperonin Cpn60/TCP-1
	Locus_46352_Transcript_1_1	8	24	7	35		29.7415	267.56	28.9951	158.563					3.16931	2.45118		SB03G013050	3587_HOM001425	Unavailable
	Locus_4644_Transcript_5_8	4	8	11	26		2.45348	14.7146	7.51741	19.4337					2.58435	1.37026		SB05G023750	3587_HOM000762	Kelch-type beta propeller;Galactose oxidase/kelch, beta-propeller; Kelch related
	Locus_4676_Transcript_1_1	1	10	6	18		2.68884	80.6309	17.975	58.9791					4.90628	1.71421		ZM10G04920	3587_HOM000327	NADPH oxidase Respiratory burst;Ferric reductase-like transmembrane component, N-terminal; Ferredoxin reductase-type FAD-binding domain
	Locus_47043_Transcript_1_2	32	2	34	10		25.7291	4.82216	30.4584	9.79795					-2.41565	-1.63629		SB03G037860	3587_HOM000106	Pyridoxal phosphate-dependent enzyme, beta subunit;Cysteine synthase A; Cysteine synthase/cystathionine beta-synthase P-phosphate-binding site
	Locus_4708_Transcript_3_4	82	63	39	85		156.192	359.85	82.768	197.299					1.20408	1.25324		SB09G004660	3587_HOM000012	Plant peroxidase;Peroxidases heam-ligand binding site; Peroxidase, active site
	Locus_479_Transcript_18_27	106	62	45	75		125.314	219.798	59.2735	108.048					0.810626	0.866213		null		Unavailable
	Locus_4791_Transcript_6_9	7	13	2	20		3.91743	21.8164	1.24706	13.6393					2.47744	3.45118		SB03G029450	3587_HOM002751	Unavailable
	Locus_4841_Transcript_14_15	7	16	7	29		5.02384	34.4346	5.59744	25.3628					2.777	2.17987		ZM10G12580	3587_HOM000011	aminocyclopropane-1-carboxylate oxidase
	Locus_4841_Transcript_15_15	2	6	4	17		1.26292	11.3614	2.81422	13.0814					3.16931	2.21671		ZM10G12580	3587_HOM000011	aminocyclopropane-1-carboxylate oxidase
	Locus_4841_Transcript_6_15	3	10	2	14		2.43069	24.2966	1.80548	13.8229					3.32132	2.9366		ZM10G12580	3587_HOM000011	aminocyclopropane-1-carboxylate oxidase
	Locus_4876_Transcript_1_7	40	43	38	64		28.1828	90.8511	29.8306	54.9497					1.68869	0.88132		SB01G042690	3587_HOM000040	Major facilitator superfamily, general substrate transporter;Sugar transporter, conserved site; Sugar/inositol transporter
	Locus_4876_Transcript_3_7	51	34	41	76		28.2135	56.4031	25.2711	51.2344					0.999388	1.01962		SB01G042690	3587_HOM000040	Major facilitator superfamily, general substrate transporter;Sugar transporter, conserved site; Sugar/inositol transporter
	Locus_4876_Transcript_4_7	42	40	30	71		23.4818	67.0625	18.6878	48.3729					1.51396	1.3721		SB01G042690	3587_HOM000040	Major facilitator superfamily, general substrate transporter;Sugar transporter, conserved site; Sugar/inositol transporter
	Locus_4876_Transcript_5_7	36	37	30	74		19.8489	61.1749	18.4293	49.7196					1.62388	1.43181		SB01G042690	3587_HOM000040	Major facilitator superfamily, general substrate transporter;Sugar transporter, conserved site; Sugar/inositol transporter
	Locus_4876_Transcript_6_7	43	32	34	72		22.985	51.2936	20.2493	46.8997					1.15809	1.21171		SB01G042690	3587_HOM000040	Major facilitator superfamily, general substrate transporter;Sugar transporter, conserved site; Sugar/inositol transporter
	Locus_4899_Transcript_1_3	162	32	61	30		85.2546	50.4998	35.7673	19.2391					-0.7555	-0.894599		ZM04G27280	3587_HOM002898	SKI-interacting protein, SKIP;SKI-interacting protein SKIP, SNW domain
	Locus_491_Transcript_3_5	10	11	7	32		13.5228	44.6063	10.5467	52.7324					1.72185	2.32189		SB01G020970	3587_HOM000529	Heavy metal transport/detoxification protein
	Locus_493_Transcript_3_7	53	36	53	83		79.7899	162.522	88.8999	152.269					1.02636	0.776366		ZM03G41770	3587_HOM000241	Plant lipid transfer protein/Par allergen;Bifunctional inhibitor/plant lipid transfer protein/seed storage
	Locus_493_Transcript_4_7	74	45	58	92		94.3317	172.019	82.3773	142.914					0.86675	0.794828		ZM03G41770	3587_HOM000241	Plant lipid transfer protein/Par allergen;Bifunctional inhibitor/plant lipid transfer protein/seed storage
	Locus_493_Transcript_7_7	55	36	44	82		82.4786	161.889	73.5165	149.849					0.972916	1.02737		ZM03G41770	3587_HOM000241	Plant lipid transfer protein/Par allergen;Bifunctional inhibitor/plant lipid transfer protein/seed storage
	Locus_4940_Transcript_13_15	17	18	34	60		14.5488	46.1942	32.4198	62.5734					1.66681	0.948675		BD2G37800	3587_HOM000119	AP2-like ethylene-responsive transcription factor
	Locus_49554_Transcript_1_3	9	12	22	61		40.3326	161.262	109.847	333.123					1.99939	1.60055		SB04G037290	3587_HOM112621	Unavailable
	Locus_49581_Transcript_1_1	56	7	50	8		198.004	74.2199	196.974	34.4696					-1.41565	-2.51461		SB04G008610	3587_HOM008993	Unavailable
	Locus_498_Transcript_1_4	33	40	28	81		16.7271	60.8002	15.8132	50.0327					1.86188	1.66174		SB01G038470	3587_HOM000050	Protein of unknown function DUF231, plant
	Locus_498_Transcript_2_4	324	284	331	581		237.998	625.581	270.901	520.074					1.39425	0.940954		ZM01G12300	3587_HOM001429	Rossmann-like alpha/beta/alpha sandwich fold;Glutamine amidotransferase, type II; Asparagine synthase, glutamine-hydrolyzing
	Locus_498_Transcript_3_4	206	244	224	486		66.2339	235.256	80.2444	190.419					1.82859	1.2467		ZM01G12300	3587_HOM001429	Rossmann-like alpha/beta/alpha sandwich fold;Glutamine amidotransferase, type II; Asparagine synthase, glutamine-hydrolyzing
	Locus_498_Transcript_4_4	366	294	408	649		121.635	292.997	151.075	262.836					1.26832	0.798897		ZM01G12300	3587_HOM001429	Rossmann-like alpha/beta/alpha sandwich fold;Glutamine amidotransferase, type II; Asparagine synthase, glutamine-hydrolyzing
	Locus_5_Transcript_1198_3585	42	39	35	62		122.318	340.6	113.57	220.037					1.47744	0.954161		BD2G39690	3587_HOM000256	ATPase, V0 complex, proteolipid subunit C, eukaryotic;Amine oxidase; ATPase, V0 complex, proteolipid subunit C
	Locus_5_Transcript_1470_3585	442	52	202	63		1334.31	470.733	679.421	231.759					-1.50311	-1.55168		ZM06G08770	3587_HOM001143	Profilin/allergen;Profilin, plant
	Locus_5_Transcript_150_3585	1131	179	244	159		5168.63	2453.03	1242.38	885.463					-1.07522	-0.488607		null		Unavailable
	Locus_5_Transcript_151_3585	3216	513	701	509		25468.1	12182.4	6185.17	4912.01					-1.06389	-0.332501		null		Unavailable
	Locus_5_Transcript_1680_3585	18	16	18	59		24.0319	64.0578	26.7757	95.9905					1.41443	1.84197		ZM01G39770	3587_HOM000465	Triose phosphate/phosphate translocator, non-green plastid, chloroplastic
	Locus_5_Transcript_178_3585	347	163	92	164		2446.35	3445.99	722.654	1408.94					0.494287	0.963237		null		Unavailable
	Locus_5_Transcript_192_3585	1	10	0	20		4.6248	138.685	0.001	112.716					4.90628	16.7823		null		Unavailable
	Locus_5_Transcript_2056_3585	69	43	73	119		124.071	231.861	146.251	260.753					0.902091	0.834241		ZM01G35600	3587_HOM006004	Unavailable
	Locus_5_Transcript_2145_3585	32	23	10	26		122.511	264.053	42.656	121.3					1.10791	1.50776		null		Unavailable
	Locus_5_Transcript_2307_3585	27	23	11	37		82.5857	210.963	37.4876	137.913					1.35302	1.87927		SB03G006650	3587_HOM000420	Octicosapeptide/Phox/Bem1p
	Locus_5_Transcript_2310_3585	66	46	22	63		70.2663	146.858	26.0963	81.7344					1.06352	1.6471		SB03G006650	3587_HOM000420	Octicosapeptide/Phox/Bem1p
	Locus_5_Transcript_2520_3585	11	14	8	33		45.9141	175.234	37.2046	167.853					1.93227	2.17364		SB02G032250	3587_HOM001734	UTP--glucose-1-phosphate uridylyltransferase;UTP--glucose-1-phosphate uridylyltransferase, subgroup
	Locus_5_Transcript_26_3585	695	359	209	737		3478.61	5388.31	1165.52	4495.2					0.631321	1.94741		null		Unavailable
	Locus_5_Transcript_262_3585	601	72	224	151		4483.07	1610.54	1861.67	1372.58					-1.47695	-0.439703		SB00G01470	3587_HOM000375	Unavailable
	Locus_5_Transcript_2787_3585	28	1	35	14		77.4488	8.29457	107.864	47.1895					-3.223	-1.19268		SB03G006010	3587_HOM103098	Membrane insertion protein, OxaA/YidC;Membrane insertion protein, OxaA/YidC, core
	Locus_5_Transcript_3173_3585	186	26	82	40		269.49	112.964	132.372	70.6238					-1.25437	-0.906376		SB01G049990	3587_HOM002050	Nascent polypeptide-associated complex NAC
	Locus_5_Transcript_328_3585	19	16	9	53		155.8	393.433	82.2262	529.603					1.33642	2.68724		SB01G024170	3587_HOM001198	Unavailable
	Locus_5_Transcript_3283_3585	7	18	1	11		48.175	371.478	7.66792	92.2523					2.94692	3.58868		null		Unavailable
	Locus_5_Transcript_3416_3585	31	33	12	36		63.1025	201.435	27.2157	89.2993					1.67455	1.71421		null		Unavailable
	Locus_5_Transcript_343_3585	132	11	71	26		972.092	242.92	582.566	233.328					-2.00061	-1.32006		null		Unavailable
	Locus_5_Transcript_3445_3585	50	52	10	39		63.1114	196.824	14.0634	59.9878					1.64093	2.09272		SB04G029920	3587_HOM095331	Protein of unknown function DUF3474;Fatty acid desaturase, type 1
	Locus_5_Transcript_3447_3585	11	20	1	19		105.985	577.855	10.7351	223.083					2.44685	4.37717		SB04G029920	3587_HOM095331	Protein of unknown function DUF3474;Fatty acid desaturase, type 1
	Locus_5_Transcript_3580_3585	2561	312	1004	673		660.207	241.192	288.375	211.42					-1.45274	-0.447833		SB00G01210	3587_HOM000375	Unavailable
	Locus_5_Transcript_3581_3585	1268	116	297	86		327.831	89.9345	85.5542	27.0951					-1.86601	-1.65881		SB00G01995	3587_HOM000375	Unavailable
	Locus_5_Transcript_3582_3585	4649	1966	1634	1860		665.244	843.611	260.512	324.336					0.342693	0.316142		OSINDICA_03G21260	3587_HOM000563	Sucrose synthase, plant/cyanobacteria;Glycosyl transferase, group 1
	Locus_5_Transcript_3584_3585	770	71	389	175		265.278	73.3511	149.319	73.47					-1.85462	-1.02317		SB00G01935	3587_HOM007999	Unavailable
	Locus_5_Transcript_3585_3585	2725	374	1002	695		441.948	181.892	181.061	137.357					-1.2808	-0.39855		ZM02G34990	3587_HOM003698	MOSC, N-terminal beta barrel;Pyruvate kinase, beta-barrel-like; Molybdenum cofactor sulfurase, C-terminal
	Locus_5_Transcript_386_3585	1408	118	532	283		15653.2	3933.86	6589.69	3833.96					-1.99244	-0.781377		null		Unavailable
	Locus_5_Transcript_470_3585	1449	93	391	234		16424.8	3161.21	4938.14	3232.29					-2.37733	-0.611413		null		Unavailable
	Locus_5_Transcript_52_3585	69	82	30	121		224.095	798.609	108.557	478.883					1.83338	2.14122		null		Unavailable
	Locus_5_Transcript_526_3585	2161	149	890	376		16119.7	3332.92	7396.82	3417.83					-2.27396	-1.11383		OS09G01000	3587_HOM001198	Unavailable
	Locus_5_Transcript_66_3585	8027	1176	1670	1106		69780.6	30656.7	16175.3	11716.5					-1.18662	-0.465249		null		Unavailable
	Locus_5_Transcript_735_3585	257	56	162	87		355.86	232.526	249.928	146.8					-0.613919	-0.767659		OSINDICA_06G41810	3587_HOM000025	ATPase, AAA-type, core;ATPase, AAA+ type, core; Peptidase M41, FtsH
	Locus_5_Transcript_742_3585	174	30	151	49		1010.95	522.683	977.486	346.926					-0.951702	-1.49445		ZM06G11880	3587_HOM000025	ATPase, AAA-type, core;ATPase, AAA+ type, core; Peptidase M41, FtsH
	Locus_5_Transcript_803_3585	27	57	49	122		81.9355	518.704	165.675	451.158					2.66235	1.44527		ZM05G17040	3587_HOM002709	Translationally controlled tumour-associated TCTP;Translationally controlled tumour protein, conserved site
	Locus_50081_Transcript_1_1	358	28	148	86		464.556	108.956	213.979	135.992					-2.09211	-0.653941		OS09G01000	3587_HOM001198	Unavailable
	Locus_510_Transcript_8_8	25	23	20	47		86.5419	238.754	77.1383	198.265					1.46406	1.36191		ZM09G18820	3587_HOM001287	Ribosomal protein S4;RNA-binding S4; Ribosomal protein S4/S9, eukaryotic/archaeal
	Locus_5135_Transcript_7_11	73	10	107	59		59.86	24.5896	97.7578	58.9558					-1.28355	-0.729577		SB07G023920	3587_HOM001021	Malate dehydrogenase, NAD/NADP;Lactate dehydrogenase/glycoside hydrolase, family 4, C-terminal; NAD(P)-binding domain
	Locus_5135_Transcript_8_11	126	18	135	71		138.086	59.1548	164.842	94.82					-1.223	-0.797821		SB07G023920	3587_HOM001021	Malate dehydrogenase, NAD/NADP;Lactate dehydrogenase/glycoside hydrolase, family 4, C-terminal; NAD(P)-binding domain
	Locus_514_Transcript_6_11	151	30	174	98		31.2598	18.6238	40.134	24.7228					-0.747164	-0.698986		SB08G000480	3587_HOM001585	Clathrin, heavy chain;Clathrin, heavy chain/VPS, 7-fold repeat; Tetratricopeptide-like helical
	Locus_51589_Transcript_4_6	6	9	1	13		5.98035	26.9001	1.11053	15.7899					2.16931	3.82969		SB10G022060	3587_HOM000002	BRASSINOSTEROID INSENSITIVE 1-associated receptor kinase 1
	Locus_51589_Transcript_5_6	3	7	1	11		2.99017	20.9223	1.11053	13.3607					2.80674	3.58868		SB10G022060	3587_HOM000002	BRASSINOSTEROID INSENSITIVE 1-associated receptor kinase 1
	Locus_51883_Transcript_1_1	0	17	8	34		0.001	199.801	34.9345	162.387					17.6082	2.21671		ZM10G04920	3587_HOM000327	NADPH oxidase Respiratory burst;Ferric reductase-like transmembrane component, N-terminal; Ferredoxin reductase-type FAD-binding domain
	Locus_520_Transcript_1_7	905	181	385	196		1131.2	678.433	536.174	298.544					-0.737578	-0.844757		OS04G30040	3587_HOM000006	Serine/threonine-protein kinase-like domain;Tyrosine-protein kinase, catalytic domain; Protein kinase-like domain
	Locus_520_Transcript_6_7	846	207	372	231		999.127	733.091	489.493	332.448					-0.446676	-0.558162		ZM02G28540	3587_HOM000810	Mannose-binding lectin;Plant disease resistance response protein
	Locus_5219_Transcript_10_14	73	1	75	31		36.7287	1.50876	42.0434	19.0067					-4.60547	-1.14537		ZM06G30170	3587_HOM002670	Methyltransferase type 11
	Locus_5219_Transcript_13_14	57	2	64	24		30.0929	3.16633	37.6463	15.4405					-3.24854	-1.28579		ZM06G30170	3587_HOM002670	Methyltransferase type 11
	Locus_5219_Transcript_14_14	46	3	65	24		26.1738	5.11879	41.2075	16.6411					-2.35425	-1.30816		ZM06G30170	3587_HOM002670	Methyltransferase type 11
	Locus_5219_Transcript_6_14	65	6	81	18		33.9598	9.40026	47.1509	11.46					-1.85305	-2.04068		ZM06G30170	3587_HOM002670	Methyltransferase type 11
	Locus_5219_Transcript_8_14	53	4	70	20		29.8629	6.75854	43.9448	13.7324					-2.14357	-1.67811		ZM06G30170	3587_HOM002670	Methyltransferase type 11
	Locus_5219_Transcript_9_14	55	2	64	24		31.1874	3.40081	40.4342	16.584					-3.19701	-1.28579		ZM06G30170	3587_HOM002670	Methyltransferase type 11
	Locus_522_Transcript_1_2	151	21	310	148		170.494	71.1032	389.985	203.637					-1.26174	-0.937424		SB01G013000	3587_HOM104043	Unavailable
	Locus_53_Transcript_8_17	77	43	25	45		140.422	235.152	50.7969	100.004					0.743829	0.977244		ZM03G05530	3587_HOM002185	Plant metallothionein, family 15
	Locus_5374_Transcript_1_4	30	37	11	28		13.8191	51.1091	5.64554	15.7173					1.88691	1.47717		ZM09G13860	3587_HOM000699	Leucine-rich repeat, cysteine-containing subtype
	Locus_5375_Transcript_4_5	4	7	6	24		3.525	18.4984	5.8912	25.7734					2.39171	2.12925		SB01G030560	3587_HOM000011	aminocyclopropane-1-carboxylate oxidase
	Locus_5375_Transcript_5_5	1	5	10	35		0.88125	13.2131	9.81867	37.5862					3.90628	1.9366		SB01G030560	3587_HOM000011	aminocyclopropane-1-carboxylate oxidase
	Locus_5411_Transcript_5_12	3	7	2	13		1.35334	9.46934	1.00524	7.14642					2.80674	2.82969		BD5G13570	3587_HOM000501	Raffinose synthase;Glycoside hydrolase, catalytic core
	Locus_5413_Transcript_2_3	13	15	20	42		22.3337	77.2763	38.2826	87.9282					1.7908	1.19964		null		Unavailable
	Locus_5413_Transcript_3_3	21	17	11	45		35.4974	86.1714	20.7168	92.6937					1.2795	2.16167		null		Unavailable
	Locus_5426_Transcript_3_3	57	36	23	56		58.2186	110.262	26.1739	69.7005					0.921385	1.41304		ZM01G10600	3587_HOM004470	Zinc finger, C2H2-like;Zinc finger, C2H2-type; Zinc finger, AN1-type
	Locus_545_Transcript_5_6	34	24	60	126		64.8693	137.312	127.546	292.949					1.08185	1.19964		null		Unavailable
	Locus_5455_Transcript_1_2	4	9	7	39		7.39968	49.9267	14.428	87.9182					2.75428	2.60729		SB02G009320	3587_HOM001465	DEFECTIVE IN INDUCED RESISTANCE 1, DIR1
	Locus_5455_Transcript_2_2	6	12	10	38		10.5589	63.3266	19.6075	81.4915					2.58435	2.05525		SB02G009320	3587_HOM001465	DEFECTIVE IN INDUCED RESISTANCE 1, DIR2
	Locus_5475_Transcript_18_20	119	61	28	53		32.8921	50.5606	8.62297	17.8518					0.62027	1.04981		ZM03G13790	3587_HOM000002	BRASSINOSTEROID INSENSITIVE 1-associated receptor kinase 1
	Locus_54926_Transcript_1_1	4	7	8	21		10.4871	55.0338	23.3689	67.0926					2.39171	1.52156		BD2G37800	3587_HOM000119	DNA-binding, integrase-type;Pathogenesis-related transcriptional factor/ERF, DNA-binding
	Locus_5530_Transcript_4_4	211	24	93	44		824.183	281.119	404.742	209.438					-1.55179	-0.95048		null		Unavailable
	Locus_5750_Transcript_4_5	9	14	11	27		12.9425	60.3729	17.6248	47.3153					2.22178	1.4247		ZM01G51300	3587_HOM002900	Unavailable
	Locus_5770_Transcript_6_7	72	49	35	79		40.5289	82.7115	21.951	54.1902					1.02914	1.30375		SB06G025480	3587_HOM001695	Amino acid transporter, transmembrane
	Locus_58_Transcript_2_4	515	29	139	84		1696.42	286.458	510.146	337.183					-2.5661	-0.597376		OSINDICA_01G12060	3587_HOM007710	Unavailable
	Locus_58_Transcript_3_4	461	30	140	83		1398.97	273.002	473.358	306.935					-2.35738	-0.624996		OSINDICA_01G12060	3587_HOM007710	Unavailable
	Locus_58_Transcript_4_4	492	20	174	94		1477.53	180.111	582.204	344.002					-3.03624	-0.759107		OSINDICA_01G12060	3587_HOM007710	Unavailable
	Locus_584_Transcript_3_5	145	25	98	49		67.655	34.9791	50.9462	27.8605					-0.951702	-0.870753		ZM01G49450	3587_HOM000083	Chaperone DnaK;Heat shock protein 70; Heat shock protein Hsp70
	Locus_5876_Transcript_2_10	92	13	75	36		24.4137	10.3449	22.1748	11.6415					-1.23877	-0.929646		ZM08G12200	3587_HOM000082	Unavailable
	Locus_5876_Transcript_3_10	92	10	88	41		26.9224	8.77532	28.6921	14.6208					-1.61728	-0.972632		ZM02G28340	3587_HOM000082	Zinc finger, RING-type
	Locus_5876_Transcript_5_10	93	15	85	38		24.6904	11.9419	25.143	12.2939					-1.04792	-1.03222		OSINDICA_03G59150	3587_HOM000082	Zinc finger, RING-type
	Locus_5884_Transcript_2_2	210	153	167	220		202.842	443.167	179.725	258.954					1.12749	0.526903		ZM08G28550	3587_HOM003369	Transaldolase;Transaldolase, bacterial/plant type; Transaldolase subfamily
	Locus_5929_Transcript_2_2	41	3	111	64		101.291	22.2252	305.537	192.676					-2.18824	-0.665168		SB09G002470	3587_HOM002382	Glutamate--cysteine ligase, plant;Glutamate--cysteine ligase, GCS2
	Locus_594_Transcript_1_4	15	34	3	17		14.8104	100.668	3.30028	20.4544					2.76492	2.63175		ZM07G17710	3587_HOM059017	Unavailable
	Locus_594_Transcript_2_4	16	31	2	28		19.8064	115.076	2.75848	42.2382					2.53855	3.9366		ZM07G17710	3587_HOM059017	Unavailable
	Locus_594_Transcript_3_4	18	33	5	23		21.5441	118.442	6.66775	33.5463					2.45882	2.33088		ZM07G17710	3587_HOM059017	Unavailable
	Locus_594_Transcript_4_4	7	24	3	28		8.42185	86.5881	4.02147	41.0515					3.36196	3.35164		ZM07G17710	3587_HOM059017	Unavailable
	Locus_59998_Transcript_1_1	19	21	3	30		74.4671	246.813	13.1004	143.283					1.72874	3.45118		null		Unavailable
	Locus_60039_Transcript_1_1	8	24	10	78		37.2968	335.529	51.9439	443.136					3.16931	3.09272		OSINDICA_10G16150	3587_HOM113895	Unavailable
	Locus_602_Transcript_1_5	195	264	236	480		133.724	542.896	180.319	401.123					2.02141	1.15349		ZM08G29620	3587_HOM000648	Fructose-bisphosphate aldolase, class-I;Aldolase-type TIM barrel
	Locus_602_Transcript_2_5	191	249	281	471		128.992	504.273	211.441	387.624					1.96692	0.874404		ZM08G29620	3587_HOM000648	Fructose-bisphosphate aldolase, class-I;Aldolase-type TIM barrel
	Locus_602_Transcript_3_5	189	217	249	500		130.461	449.174	191.501	420.581					1.78366	1.13503		ZM08G29620	3587_HOM000648	Fructose-bisphosphate aldolase, class-I;Aldolase-type TIM barrel
	Locus_602_Transcript_4_5	219	263	273	499		109.33	393.72	151.849	303.568					1.84848	0.999386		ZM08G29620	3587_HOM000648	Fructose-bisphosphate aldolase, class-I;Aldolase-type TIM barrel
	Locus_602_Transcript_5_5	175	247	260	475		117.98	499.348	195.297	390.233					2.08151	0.998663		ZM08G29620	3587_HOM000648	Fructose-bisphosphate aldolase, class-I;Aldolase-type TIM barrel
	Locus_60210_Transcript_3_5	10	13	0	9		8.48899	33.093	0.001	9.31021					1.96286	13.1846		SB03G047150	3587_HOM000718	Root cap
	Locus_60210_Transcript_4_5	8	13	1	9		6.80618	33.1661	0.94791	9.33076					2.28479	3.29917		SB03G047150	3587_HOM000718	Root cap
	Locus_6032_Transcript_1_3	26	21	15	35		20.4082	49.4296	13.1182	33.478					1.27623	1.35164		SB01G035310	3587_HOM000079	Zinc finger, C3HC4 RING-type;Zinc finger, RING-type
	Locus_6052_Transcript_1_6	115	14	99	53		72.5385	26.4811	69.576	40.7387					-1.45378	-0.772189		SB01G000240	3587_HOM002487	Unavailable
	Locus_6052_Transcript_5_6	137	23	134	62		55.3071	27.8436	60.2724	30.5009					-0.99012	-0.982645		SB01G000240	3587_HOM002487	Unavailable
	Locus_6052_Transcript_6_6	129	24	138	69		46.1193	25.7301	54.97	30.061					-0.841914	-0.870753		SB01G000240	3587_HOM002487	Unavailable
	Locus_606_Transcript_10_10	44	330	198	259		21.4472	482.358	107.532	153.843					4.49124	0.516699		SB02G035460	3587_HOM116023	Endo-1,3-beta-glucosidase
	Locus_606_Transcript_2_10	66	336	202	245		32.0492	489.272	109.29	144.978					3.93227	0.407674		SB02G035460	3587_HOM116023	Endo-1,3-beta-glucosidase
	Locus_61174_Transcript_1_1	49	39	4	41		176.492	421.24	16.0525	179.959					1.25504	3.4868		OSINDICA_06G42140	3587_HOM021875	Unavailable
	Locus_613_Transcript_1_6	176	84	115	173		95.491	136.668	69.5186	114.382					0.517236	0.718386		SB10G030840	3587_HOM001655	Catalase, N-terminal;Catalase-like domain, haem-dependent; Catalase-related immune responsive
	Locus_613_Transcript_2_6	180	108	115	162		87.0414	156.608	61.9591	95.4618					0.847385	0.623607		SB10G030840	3587_HOM001655	Catalase, N-terminal;Catalase-like domain, haem-dependent; Catalase-related immune responsive
	Locus_613_Transcript_5_6	174	83	103	137		99.1517	141.829	65.3946	95.1333					0.516446	0.540779		SB10G030840	3587_HOM001655	Catalase, N-terminal;Catalase-like domain, haem-dependent; Catalase-related immune responsive
	Locus_613_Transcript_6_6	173	118	126	185		89.6963	183.462	72.7867	116.886					1.03237	0.683349		SB10G030840	3587_HOM001655	Catalase, N-terminal;Catalase-like domain, haem-dependent; Catalase-related immune responsive
	Locus_61328_Transcript_1_1	167	104	48	162		731.384	1365.84	234.22	864.58					0.901086	1.88413		OSINDICA_10G16150	3587_HOM113895	Unavailable
	Locus_6144_Transcript_2_3	41	30	6	23		19.0915	41.8904	3.11287	13.051					1.13369	2.06785		ZM01G01270	3587_HOM000020	Proteinase inhibitor I9, subtilisin propeptide;Peptidase S8/S53, subtilisin/kexin/sedolisin; Peptidase S8, subtilisin-related
	Locus_6162_Transcript_1_3	11	21	32	53		18.1689	104.014	58.8896	106.677					2.51724	0.857168		OS01G55540	3587_HOM000990	Aminotransferases, class-I, pyridoxal-phosphate-binding site;Aminotransferase, class I/II; Pyridoxal phosphate-dependent transferase, major domain
	Locus_6162_Transcript_2_3	13	18	23	48		12.8687	53.4318	25.3671	57.9018					2.05384	1.19065		OS01G55540	3587_HOM000990	Aminotransferases, class-I, pyridoxal-phosphate-binding site;Aminotransferase, class I/II; Pyridoxal phosphate-dependent transferase, major domain
	Locus_6162_Transcript_3_3	168	231	391	594		117.794	485.693	305.452	507.528					2.04378	0.732542		OS01G55540	3587_HOM000990	Aminotransferases, class-I, pyridoxal-phosphate-binding site;Aminotransferase, class I/II; Pyridoxal phosphate-dependent transferase, major domain
	Locus_61742_Transcript_1_1	38	30	5	36		96.9881	229.611	14.2187	111.969					1.24331	2.97724		OSINDICA_06G42150	3587_HOM007248	Carbohydrate/purine kinase;Ribokinase; HTH transcriptional regulator, LacI
	Locus_6175_Transcript_1_5	10	14	11	58		5.74082	24.1012	7.0359	40.5754					2.06978	2.5278		ZM08G24790	3587_HOM001025	Glutamine amidotransferase type 1;Glutamine amidotransferase class-I, C-terminal; CTP synthase
	Locus_6175_Transcript_2_5	6	14	11	47		3.15614	22.0836	6.44691	30.1276					2.80674	2.2244		ZM08G24790	3587_HOM001025	Glutamine amidotransferase type 1;Glutamine amidotransferase class-I, C-terminal; CTP synthase
	Locus_6175_Transcript_4_5	19	17	8	53		10.2176	27.4145	4.79334	34.7321					1.42389	2.85717		ZM08G24790	3587_HOM001025	Glutamine amidotransferase type 1;Glutamine amidotransferase class-I, C-terminal; CTP synthase
	Locus_6175_Transcript_5_5	12	13	9	53		6.45321	20.964	5.39251	34.7321					1.69983	2.68724		ZM08G24790	3587_HOM001025	Glutamine amidotransferase type 1;Glutamine amidotransferase class-I, C-terminal; CTP synthase
	Locus_6176_Transcript_1_2	7	98	79	142		7.37776	309.734	92.7699	182.379					5.39171	0.975214		SB03G030100	3587_HOM000313	Glycoside hydrolase, chitinase active site;Glycoside hydrolase, family 18, catalytic domain; Glycoside hydrolase, subgroup, catalytic core
	Locus_6176_Transcript_2_2	14	101	66	138		14.7555	319.216	77.504	177.242					4.43521	1.19338		SB03G030100	3587_HOM000313	Glycoside hydrolase, chitinase active site;Glycoside hydrolase, family 18, catalytic domain; Glycoside hydrolase, subgroup, catalytic core
	Locus_61779_Transcript_1_2	1	11	1	16		0.712385	23.4987	0.793721	13.8898					5.04378	4.12925		ZM01G25670	3587_HOM000062	Transferase
	Locus_621_Transcript_1_1	45	48	65	117		153.932	492.373	247.733	487.712					1.67746	0.977244		null		Unavailable
	Locus_62221_Transcript_3_3	26	25	3	26		89.4679	257.971	11.5019	109.025					1.52777	3.24472		null		Unavailable
	Locus_62286_Transcript_1_2	5	9	20	51		2.70773	14.6155	12.0675	33.6563					2.43235	1.47974		SB06G025570	3587_HOM000729	Twin arginine translocation signal, Tat;Tyrosinase; Di-copper centre-containing
	Locus_62286_Transcript_2_2	4	17	17	54		2.38146	30.3508	11.2768	39.1777					3.67181	1.79667		SB06G025570	3587_HOM000729	Twin arginine translocation signal, Tat;Tyrosinase; Di-copper centre-containing
	Locus_6301_Transcript_2_3	10	16	0	12		3.23232	15.5085	0.001	4.72668					2.26242	12.2066		SB03G039860	3587_HOM000720	Unavailable
	Locus_6301_Transcript_3_3	8	13	1	9		2.66944	13.008	0.371778	3.6596					2.28479	3.29917		SB03G039860	3587_HOM000720	Unavailable
	Locus_636_Transcript_1_6	24	24	36	61		31.0043	92.9733	51.8163	96.0286					1.58435	0.89006		SB01G031820	3587_HOM000004	BRASSINOSTEROID INSENSITIVE 1-associated receptor kinase 1
	Locus_6378_Transcript_10_11	66	6	113	41		35.5588	9.69375	67.8321	26.9183					-1.87508	-1.33338		SB09G029610	3587_HOM000571	Glucose-1-phosphate adenylyltransferase;Nucleotidyl transferase; ADP-glucose pyrophosphorylase, conserved site
	Locus_6378_Transcript_11_11	68	5	104	37		36.6364	8.07812	62.4296	24.2922					-2.18118	-1.36174		SB09G029610	3587_HOM000571	Glucose-1-phosphate adenylyltransferase;Nucleotidyl transferase; ADP-glucose pyrophosphorylase, conserved site
	Locus_6378_Transcript_2_11	64	8	115	42		34.5457	12.9491	69.1616	27.6264					-1.41565	-1.32393		SB09G029610	3587_HOM000571	Glucose-1-phosphate adenylyltransferase;Nucleotidyl transferase; ADP-glucose pyrophosphorylase, conserved site
	Locus_6378_Transcript_5_11	53	4	110	33		28.6617	6.48668	66.2783	21.747					-2.14357	-1.60772		SB09G029610	3587_HOM000571	Glucose-1-phosphate adenylyltransferase;Nucleotidyl transferase; ADP-glucose pyrophosphorylase, conserved site
	Locus_639_Transcript_1_2	60	41	32	55		58.2469	119.355	34.6119	65.0646					1.03501	0.910607		SB04G008500	3587_HOM001391	Ribosomal protein L10e, conserved site;Ribosomal protein L10e/L16; Ribosomal protein L10e
	Locus_64095_Transcript_1_1	0	7	3	16		0.001	145.329	23.1415	134.989					17.149	2.54428		SB04G036230	3587_HOM000354	Inorganic H+ pyrophosphatase
	Locus_641_Transcript_11_11	67	6	44	18		40.3256	10.8291	29.5061	13.202					-1.89678	-1.16026		SB07G022670	3587_HOM097469	Pyridoxal phosphate-dependent decarboxylase;Glutamate decarboxylase; Pyridoxal phosphate-dependent transferase, major domain
	Locus_64193_Transcript_1_1	0	4	0	7		0.001	74.5619	0.001	53.0248					16.1862	15.6944		SB02G035450	3587_HOM000006	Protein of unknown function DUF26;Serine/threonine-protein kinase-like domain; Protein kinase, ATP binding site
	Locus_64206_Transcript_1_1	0	10	0	12		0.001	198.122	0.001	96.6134					17.596	16.5599		null		Unavailable
	Locus_6422_Transcript_2_2	1	5	1	10		5.16161	77.3913	5.75094	62.8993					3.90628	3.45118		null		Unavailable
	Locus_643_Transcript_32_33	582	295	284	445		594.968	904.335	323.476	554.359					0.604046	0.777162		SB10G029870	3587_HOM117357	NAD(P)-binding domain;Glyceraldehyde 3-phosphate dehydrogenase, NAD(P) binding domain; Glyceraldehyde 3-phosphate dehydrogenase, catalytic domain
	Locus_6475_Transcript_1_2	25	25	10	31		42.0131	125.986	18.724	63.4844					1.58435	1.76152		SB04G026940	3587_HOM111558	Nitrilase/cyanide hydratase and apolipoprotein N-acyltransferase
	Locus_6475_Transcript_2_2	39	28	17	45		80.3776	173.047	39.0367	113.017					1.1063	1.53364		SB04G026940	3587_HOM111558	Nitrilase/cyanide hydratase and apolipoprotein N-acyltransferase
	Locus_648_Transcript_23_31	18	23	32	56		19.2879	73.9055	38.2046	73.1241					1.93799	0.936602		OSINDICA_11G03520	3587_HOM000886	Unavailable
	Locus_648_Transcript_25_31	16	29	35	59		16.8943	91.8235	41.1757	75.9157					2.44233	0.882607		SB05G002860	3587_HOM000886	Unavailable
	Locus_648_Transcript_28_31	27	29	33	61		28.5874	92.0758	38.9294	78.7048					1.68744	1.01559		OS11G05050	3587_HOM000886	Unavailable
	Locus_648_Transcript_30_31	23	44	36	100		21.3424	122.435	37.2195	113.077					2.52022	1.60318		OSINDICA_11G03520	3587_HOM000886	Unavailable
	Locus_6572_Transcript_3_3	35	24	13	46		33.2788	68.4302	13.772	53.2989					1.04003	1.95237		ZM08G33720	3587_HOM000703	Flavodoxin/nitric oxide synthase;NADPH-dependent FMN reductase; Flavoprotein WrbA
	Locus_659_Transcript_4_6	382	164	154	204		256.635	330.395	115.273	167.01					0.364474	0.534886		ZM06G01850	3587_HOM001629	Ribosomal protein 60S;Ribosomal protein L10
	Locus_66_Transcript_1_6	98	6	46	17		182.46	33.4988	95.423	38.5701					-2.4454	-1.30685		SB09G026730	3587_HOM001528	Zinc finger, C2H2-like;Zinc finger, C2H2-type
	Locus_66_Transcript_2_6	99	15	85	30		77.9726	35.4271	74.5898	28.7932					-1.13812	-1.37325		SB09G026730	3587_HOM001528	Zinc finger, C2H2-like
	Locus_66_Transcript_3_6	157	19	86	34		126.058	45.7469	76.9348	33.2668					-1.46234	-1.20955		SB09G026730	3587_HOM001528	Zinc finger, C2H2-like
	Locus_66_Transcript_4_6	125	20	89	31		108.34	51.981	85.945	32.7416					-1.05951	-1.39229		SB09G026730	3587_HOM001528	Zinc finger, C2H2-like
	Locus_66_Transcript_5_6	100	13	85	19		86.4126	33.6866	81.837	20.0074					-1.35907	-2.03222		SB09G026730	3587_HOM001528	Zinc finger, C2H2-like
	Locus_66_Transcript_6_6	136	10	101	28		117.785	25.971	97.4601	29.5509					-2.18118	-1.72161		SB09G026730	3587_HOM001528	Zinc finger, C2H2-like
	Locus_6796_Transcript_1_2	183	38	334	165		207.436	129.168	421.826	227.918					-0.683422	-0.888135		SB01G042930	3587_HOM004133	ATPase, F1 complex, gamma subunit
	Locus_6816_Transcript_8_12	107	18	117	59		33.2563	16.7764	40.5163	22.3462					-0.987192	-0.858474		OSINDICA_01G08040	3587_HOM005016	Unavailable
	Locus_6839_Transcript_1_1	3	42	213	276		4.07113	170.915	322.052	456.419					5.39171	0.503062		SB02G005750	3587_HOM000289	Metridin-like ShK toxin;Prolyl 4-hydroxylase, alpha subunit; Oxoglutarate/iron-dependent oxygenase
	Locus_6842_Transcript_1_4	2	6	3	22		2.97606	26.7732	4.97378	39.8929					3.16931	3.00372		SB10G028010	3587_HOM000058	Peptidase C1A, papain;Peptidase C1A, papain C-terminal; Peptidase, cysteine peptidase active site
	Locus_70_Transcript_16_22	27	21	8	21		25.1146	58.5758	8.29097	23.8036					1.22178	1.52156		OSINDICA_04G35900	3587_HOM000613	Phenylalanine/histidine ammonia-lyase;L-Aspartase-like; Phenylalanine ammonia-lyase
	Locus_70_Transcript_18_22	104	60	45	86		81.2465	140.559	39.1685	81.8711					0.790801	1.06366		SB04G026520	3587_HOM000613	Phenylalanine/histidine ammonia-lyase;L-Aspartase-like; Phenylalanine ammonia-lyase
	Locus_70_Transcript_20_22	65	94	40	131		163.376	708.5	112.018	401.243					2.11657	1.84074		ZM04G19160	3587_HOM000613	Phenylalanine/histidine ammonia-lyase;L-Aspartase-like; Phenylalanine ammonia-lyase
	Locus_70_Transcript_21_22	630	369	398	444		645.75	1134.19	454.528	554.585					0.812619	0.287039		SB04G026510	3587_HOM000613	Phenylalanine/histidine ammonia-lyase;L-Aspartase-like; Phenylalanine ammonia-lyase
	Locus_704_Transcript_10_10	22	43	19	73		22.2931	130.663	21.4513	90.1428					2.55118	2.07114		SB09G028400	3587_HOM000535	Zinc finger, C2H2-like
	Locus_704_Transcript_3_10	39	34	20	80		35.9871	94.0801	20.562	89.9566					1.38641	2.12925		SB09G028400	3587_HOM000535	Zinc finger, C2H2-like
	Locus_704_Transcript_4_10	33	42	31	81		33.5573	128.073	35.1227	100.373					1.93227	1.5149		SB09G028400	3587_HOM000535	Zinc finger, C2H2-like
	Locus_704_Transcript_6_10	37	27	17	67		26.7539	58.5444	13.6958	59.0365					1.12978	2.10787		SB09G028400	3587_HOM000535	Zinc finger, C2H2-like
	Locus_704_Transcript_7_10	66	39	30	92		74.303	131.663	37.6303	126.215					0.825359	1.74592		SB09G028400	3587_HOM000535	Zinc finger, C2H2-like
	Locus_704_Transcript_8_10	22	37	24	80		15.0511	75.9076	18.2941	66.6956					2.33437	1.86621		SB09G028400	3587_HOM000535	Zinc finger, C2H2-like
	Locus_704_Transcript_9_10	38	34	24	56		38.3382	102.864	26.9782	68.849					1.42389	1.35164		SB09G028400	3587_HOM000535	Zinc finger, C2H2-like
	Locus_7050_Transcript_7_10	16	15	41	78		8.17464	22.9814	23.3392	48.5628					1.49124	1.0571		SB01G037000	3587_HOM000044	NAF domain;NAF/FISL domain; Serine/threonine-protein kinase-like domain
	Locus_7083_Transcript_6_6	19	16	10	24		11.2482	28.4045	6.59606	17.3142					1.33642	1.39228		SB06G034170	3587_HOM002184	Amine oxidase;Cyclin-like F-box; Flavin-containing amine oxidase
	Locus_7099_Transcript_3_3	20	18	3	16		17.3343	46.7829	2.89702	16.8989					1.43235	2.54428		null		Unavailable
	Locus_71_Transcript_3_10	168	24	127	52		153.551	65.7795	129.33	57.9171					-1.223	-1.159		ZM05G34160	3587_HOM002455	Adenosine kinase;Carbohydrate/purine kinase; Carbohydrate/puine kinase, PfkB, conserved site
	Locus_7103_Transcript_5_8	15	14	8	30		8.90298	24.9178	5.29039	21.6983					1.48481	2.03614		SB01G027540	3587_HOM000054	Peptidase S10, serine carboxypeptidase;Peptidase S10, serine carboxypeptidase, active site
	Locus_7107_Transcript_1_3	67	73	149	204		30.107	98.3679	74.599	111.708					1.70809	0.582504		BD5G13350	3587_HOM000541	Copper amine oxidase;Copper amine oxidase, N2/N3-terminal; Copper amine oxidase, N-terminal
	Locus_7107_Transcript_2_3	64	95	167	229		25.4023	113.072	73.8521	110.762					2.15421	0.584747		OS04G04950	3587_HOM000541	Copper amine oxidase;Copper amine oxidase, N2/N3-terminal; Copper amine oxidase, N-terminal
	Locus_7107_Transcript_3_3	61	103	142	239		26.2577	132.954	68.1034	125.368					2.34011	0.880367		OSINDICA_04G31870	3587_HOM000541	Copper amine oxidase;Copper amine oxidase, N2/N3-terminal; Copper amine oxidase, N-terminal
	Locus_715_Transcript_4_10	41	28	30	63		49.6379	101.654	40.4673	92.9461					1.03415	1.19964		null		Unavailable
	Locus_715_Transcript_5_10	30	32	17	38		32.7845	104.866	20.699	50.6048					1.67746	1.28971		null		Unavailable
	Locus_715_Transcript_6_10	47	33	22	46		55.5638	116.989	28.9781	66.2694					1.07416	1.19338		null		Unavailable
	Locus_7176_Transcript_1_4	35	0	100	31		14.3602	0.001	45.7136	15.4994					-13.8098	-1.56041		ZM03G05120	3587_HOM000516	Domain of unknown function, putative Zinc finger, XS/XH;Domain of unknown function XH
	Locus_723_Transcript_2_3	52	41	22	58		75.9121	179.485	35.7836	103.18					1.24146	1.5278		SB01G005020	3587_HOM000758	Ribosomal protein S19 conserved site;Ribosomal protein S15, eukaryotic/archaeal; Ribosomal protein S19/S15
	Locus_723_Transcript_3_3	81	52	29	74		151.541	291.733	60.45	168.709					0.94494	1.48072		ZM02G46270	3587_HOM000758	Ribosomal protein S19 conserved site;Ribosomal protein S15, eukaryotic/archaeal; Ribosomal protein S19/S16
	Locus_727_Transcript_1_1	114	13	349	128		32.9188	11.2569	112.284	45.0412					-1.5481	-1.31784		ZM05G37510	3587_HOM001161	DNA topoisomerase, type IIA, subunit A/ C-terminal, alpha-beta;DNA topoisomerase, type IIA, subunit A, alpha-helical; Ribosomal protein S5 domain 2-type fold
	Locus_7376_Transcript_1_1	5	21	26	89		5.02696	63.3128	29.1247	109.04					3.65474	1.90454		SB03G032570	3587_HOM000154	Conserved hypothetical protein CHP00730
	Locus_7403_Transcript_1_2	489	117	367	217		232.955	167.142	194.797	125.975					-0.478975	-0.628838		SB01G020910	3587_HOM000025	ATPase, AAA-type, core;ATPase, AAA+ type, core; ATPase, AAA-type, CDC48
	Locus_7437_Transcript_1_2	127	73	156	209		78.5227	135.348	107.466	157.47					0.78549	0.551204		SB04G028990	3587_HOM000037	Peptidase aspartic, catalytic;Peptidase aspartic, active site; Peptidase aspartic
	Locus_7446_Transcript_3_4	2	10	4	21		1.47381	22.0977	3.28416	18.8578					3.90628	2.52156		SB10G000360	3587_HOM005685	Homogentisate 1,2-dioxygenase;Cupin, RmlC-type
	Locus_7528_Transcript_3_3	89	50	82	144		161.288	271.719	165.569	318.006					0.752473	0.94162		BD3G23310	3587_HOM001801	Ribosomal protein S7e
	Locus_7534_Transcript_4_4	3	8	1	10		8.25857	66.0406	3.06717	33.5463					2.99939	3.45118		null		Unavailable
	Locus_7618_Transcript_4_6	1	5	4	21		1.7028	25.5311	7.58887	43.5756					3.90628	2.52156		SB01G030190	3587_HOM000013	Zinc finger, C3HC4 RING-type;Zinc finger, RING-type
	Locus_7657_Transcript_1_1	7	11	25	53		8.79718	41.4548	35.0057	81.1675					2.23643	1.21331		BD2G11337	3587_HOM000069	NAD(P)-binding domain;NAD-dependent epimerase/dehydratase
	Locus_7681_Transcript_2_3	19	0	46	13		25.3377	0.001	68.3479	21.126					-14.629	-1.69387		ZM10G20860	3587_HOM000041	Serine/threonine-protein kinase-like domain;Tyrosine-protein kinase, catalytic domain; Protein kinase-like domain
	Locus_770_Transcript_4_10	74	5	45	13		330.343	66.933	223.82	70.7192					-2.30317	-1.66217		null		Unavailable
	Locus_770_Transcript_7_10	85	10	33	12		479.4	169.128	207.37	82.4748					-1.50311	-1.33018		null		Unavailable
	Locus_770_Transcript_8_10	175	19	88	40		887.434	288.927	497.204	247.183					-1.61893	-1.00826		null		Unavailable
	Locus_7727_Transcript_1_1	62	59	42	67		45.0562	128.574	34.0068	59.3333					1.5128	0.803019		SB01G014740	3587_HOM000290	Protease inhibitor I4, serpin;Protease inhibitor I4, serpin, plant
	Locus_7784_Transcript_2_2	13	20	0	14		33.2536	153.413	0.001	43.6399					2.20584	15.4134		SB08G002670	3587_HOM000241	Plant lipid transfer protein/Par allergen;Bifunctional inhibitor/plant lipid transfer protein/seed storage
	Locus_7788_Transcript_1_1	46	50	64	98		103.473	337.269	160.4	268.632					1.70464	0.743957		SB06G033780	3587_HOM116265	Inorganic pyrophosphatase
	Locus_78_Transcript_619_633	18	16	56	154		34.8603	92.9214	120.837	363.446					1.41443	1.58868		ZM05G29550	3587_HOM000309	ATPase, AAA-2;ATPase, AAA-type, core; Chaperonin clpA/B
	Locus_780_Transcript_1_2	495	101	372	211		244.685	149.714	204.88	127.1					-0.708723	-0.688812		SB04G030280	3587_HOM004125	ATPase, F1 complex, OSCP/delta subunit;ATPase, F1 complex, OSCP/delta subunit, conserved site
	Locus_780_Transcript_2_2	525	121	394	254		468.73	323.956	391.934	276.349					-0.53296	-0.50412		SB04G030280	3587_HOM004125	ATPase, F1 complex, OSCP/delta subunit;ATPase, F1 complex, OSCP/delta subunit, conserved site
	Locus_7854_Transcript_10_10	62	64	38	90		45.3699	140.441	30.9823	80.2564					1.63015	1.37317		ZM02G09020	3587_HOM000012	Plant peroxidase;Peroxidases heam-ligand binding site; Peroxidase, active site
	Locus_7854_Transcript_2_10	46	62	43	73		33.5342	135.537	34.9262	64.8506					2.01498	0.892807		ZM02G09020	3587_HOM000012	Plant peroxidase;Peroxidases heam-ligand binding site; Peroxidase, active site
	Locus_7854_Transcript_3_10	4	15	4	24		3.44363	38.7245	3.83681	25.1785					3.49124	2.71421		ZM02G09020	3587_HOM000012	Plant peroxidase;Peroxidases heam-ligand binding site; Peroxidase, active site
	Locus_7854_Transcript_6_10	59	69	43	85		43.3943	152.183	35.2373	76.1834					1.81023	1.11237		ZM02G09020	3587_HOM000012	Plant peroxidase;Peroxidases heam-ligand binding site; Peroxidase, active site
	Locus_7854_Transcript_8_10	65	64	48	84		47.5652	140.441	39.1355	74.9059					1.56198	0.936602		ZM02G09020	3587_HOM000012	Plant peroxidase;Peroxidases heam-ligand binding site; Peroxidase, active site
	Locus_7854_Transcript_9_10	59	38	40	73		42.93	82.9144	32.4282	64.7281					0.949635	0.997144		ZM02G09010	3587_HOM000012	Plant peroxidase;Peroxidases heam-ligand binding site; Peroxidase, active site
	Locus_7875_Transcript_3_11	1	5	0	10		0.765696	11.4806	0.001	9.33076					3.90628	13.1878		ZM05G27500	3587_HOM002510	Unavailable
	Locus_7954_Transcript_2_2	132	74	22	138		438.559	737.263	81.4386	558.72					0.74941	2.77834		null		Unavailable
	Locus_7963_Transcript_1_7	13	13	13	39		18.1529	54.4356	20.2255	66.3633					1.58435	1.71421		SB02G009660	3587_HOM000510	Uncharacterised protein family UPF0497, trans-membrane plant;Uncharacterised protein family UPF0497, trans-membrane plant subgroup
	Locus_7963_Transcript_2_7	12	19	7	22		16.92	80.3359	10.9969	37.801					2.24732	1.78132		SB02G009660	3587_HOM000510	Uncharacterised protein family UPF0497, trans-membrane plant;Uncharacterised protein family UPF0497, trans-membrane plant subgroup
	Locus_7963_Transcript_5_7	16	22	15	40		20.8795	86.0913	21.8094	63.6092					2.04378	1.54428		SB02G009660	3587_HOM000510	Uncharacterised protein family UPF0497, trans-membrane plant;Uncharacterised protein family UPF0497, trans-membrane plant subgroup
	Locus_7973_Transcript_1_1	132	20	99	36		152.466	69.2733	127.405	50.6713					-1.13812	-1.33018		SB10G012760	3587_HOM000969	Uncharacterised protein family UPF0497, trans-membrane plant;Uncharacterised protein family UPF0497, trans-membrane plant subgroup
	Locus_799_Transcript_2_6	53	38	46	79		46.1783	99.2848	44.6554	83.8784					1.10436	0.909466		SB04G001950	3587_HOM000189	Aldo/keto reductase, conserved site;Aldo/keto reductase subgroup; Aldo/keto reductase
	Locus_8008_Transcript_4_4	33	2	203	76		7.79939	1.41747	53.456	21.8888					-2.46004	-1.28816		ZM07G18110	3587_HOM005652	Unavailable
	Locus_8071_Transcript_1_3	86	12	48	16		53.43	22.3566	33.2263	12.1134					-1.25695	-1.45572		SB02G026540	3587_HOM003471	Protein of unknown function DUF926
	Locus_8071_Transcript_2_3	93	11	51	10		58.0597	20.5931	35.4745	7.60769					-1.49538	-2.22125		SB02G026540	3587_HOM003471	Protein of unknown function DUF926
	Locus_8071_Transcript_3_3	97	14	45	10		60.5569	26.2094	31.301	7.60769					-1.20821	-2.04068		SB02G026540	3587_HOM003471	Protein of unknown function DUF926
	Locus_808_Transcript_1_3	166	33	83	47		160.342	95.585	89.3245	55.322					-0.746295	-0.691203		ZM08G17440	3587_HOM000624	Ran binding protein 1;2) Pleckstrin homology-type; Glycosyl transferase, family 8
	Locus_8089_Transcript_1_4	27	26	29	69		32.6884	94.3931	39.1184	101.798					1.5299	1.37979		SB04G021920	3587_HOM006176	Pectinesterase inhibitor
	Locus_8166_Transcript_1_3	37	3	57	25		74.7892	18.1842	128.371	61.5798					-2.04014	-1.05979		SB08G003963	3587_HOM002596	Ubiquinol-cytochrome C reductase hinge
	Locus_818_Transcript_2_3	9	14	11	27		6.43923	30.037	8.76876	23.5405					2.22178	1.4247		SB01G010440	3587_HOM002024	Glycolipid transfer protein, GLTP
	Locus_8197_Transcript_1_1	21	19	12	76		18.012	48.869	11.4677	79.4361					1.43996	2.79221		SB06G027410	3587_HOM001706	Alternative oxidase
	Locus_823_Transcript_16_23	77	52	22	51		60.5217	122.563	19.2662	48.8485					1.018	1.34224		SB01G036580	3587_HOM002214	Ricin B-related lectin
	Locus_823_Transcript_23_23	102	59	25	51		79.6841	138.217	21.7603	48.5515					0.794568	1.15782		SB01G036580	3587_HOM002214	Ricin B-related lectin
	Locus_8264_Transcript_9_11	7	17	40	63		1.51875	11.0605	9.66943	16.6567					2.86446	0.784599		ZM06G17520	3587_HOM000927	Phosphatidylinositol-4-phosphate 5-kinase, core, subgroup;Phosphatidylinositol-4-phosphate 5-kinase, core; Chaperonin Cpn60/TCP-1
	Locus_8308_Transcript_1_3	151	16	119	63		102.217	32.479	89.7523	51.9693					-1.65405	-0.78829		SB09G014430	3587_HOM000425	Chaperonin Cpn60;Chaperonin Cpn60, conserved site; Chaperonin Cpn60/TCP-1
	Locus_8308_Transcript_2_3	282	39	177	109		132.756	55.0562	92.8392	62.5305					-1.2698	-0.570174		SB09G014430	3587_HOM000425	Chaperonin Cpn60;Chaperonin Cpn60, conserved site; Chaperonin Cpn60/TCP-2
	Locus_8308_Transcript_3_3	249	36	213	120		133.593	57.9196	127.327	78.4563					-1.20573	-0.698572		SB09G014430	3587_HOM000425	Chaperonin Cpn60;Chaperonin Cpn60, conserved site; Chaperonin Cpn60/TCP-3
	Locus_8316_Transcript_3_3	3	12	22	44		4.96934	59.6068	40.6026	88.816					3.58435	1.12925		SB04G024580	3587_HOM002011	Unavailable
	Locus_8446_Transcript_1_6	17	23	13	49		12.4166	50.3752	10.5791	43.6123					2.02045	2.04352		SB01G006100	3587_HOM001113	Riboflavin synthase-like beta-barrel;Ferredoxin reductase-type FAD-binding domain; Oxidoreductase FAD/NAD(P)-binding
	Locus_8446_Transcript_3_6	19	21	18	59		13.8773	45.9948	14.648	52.5128					1.72874	1.84197		SB01G006100	3587_HOM001113	Riboflavin synthase-like beta-barrel;Ferredoxin reductase-type FAD-binding domain; Oxidoreductase FAD/NAD(P)-binding
	Locus_8446_Transcript_4_6	27	34	29	79		21.0644	79.5428	25.2079	75.1057					1.91693	1.57505		SB01G006100	3587_HOM001113	Riboflavin synthase-like beta-barrel;Ferredoxin reductase-type FAD-binding domain; Oxidoreductase FAD/NAD(P)-binding
	Locus_8446_Transcript_5_6	7	14	6	27		5.1289	30.7603	4.89814	24.1074					2.58435	2.29917		SB01G006100	3587_HOM001113	Riboflavin synthase-like beta-barrel;Ferredoxin reductase-type FAD-binding domain; Oxidoreductase FAD/NAD(P)-binding
	Locus_8446_Transcript_6_6	18	18	11	54		13.1469	39.4241	8.95155	48.0626					1.58435	2.4247		SB01G006100	3587_HOM001113	Riboflavin synthase-like beta-barrel;Ferredoxin reductase-type FAD-binding domain; Oxidoreductase FAD/NAD(P)-binding
	Locus_8469_Transcript_1_2	98	66	36	103		68.7129	138.769	28.1234	88.0057					1.01403	1.64582		SB03G023131	3587_HOM000134	3-Oxoacyl-[acyl-carrier-protein (ACP)] synthase III C-terminal;FAE1/Type III polyketide synthase-like protein; Very-long-chain 3-ketoacyl-CoA synthase
	Locus_8486_Transcript_1_3	9	18	14	47		15.4618	92.7316	26.7978	98.3958					2.58435	1.87648		SB05G026670	3587_HOM006127	Proteinase inhibitor I12, Bowman-Birk
	Locus_8486_Transcript_2_3	8	15	20	48		13.6425	76.7064	38.0003	99.7483					2.49124	1.39228		SB05G026670	3587_HOM006127	Proteinase inhibitor I12, Bowman-Birk
	Locus_8486_Transcript_3_3	7	17	9	58		11.9196	86.8059	17.0749	120.352					2.86446	2.8173		SB05G026670	3587_HOM006127	Proteinase inhibitor I12, Bowman-Birk
	Locus_8561_Transcript_1_1	477	40	230	115		767.048	192.886	412.084	225.353					-1.99157	-0.870753		SB04G035040	3587_HOM002518	GroES-like;Chaperonin Cpn10, subgroup; Chaperonin 21, chloroplast
	Locus_861_Transcript_1_1	200	110	61	136		299.922	494.662	101.921	248.53					0.721854	1.28597		ZM05G01740	3587_HOM002470	Ribosomal protein S26e
	Locus_8611_Transcript_3_3	74	5	62	24		92.0978	18.6605	85.9731	36.399					-2.30317	-1.23999		ZM05G21250	3587_HOM003820	Uncharacterised protein family UPF0133
	Locus_8682_Transcript_2_7	78	7	36	14		74.9656	20.1745	38.5499	16.3967					-1.8937	-1.23332		SB07G000980	3587_HOM000505	Adenylate kinase;Adenylate kinase, subfamily; Adenylate kinase, active site lid domain
	Locus_8682_Transcript_4_7	88	7	33	10		144.525	34.4743	60.3848	20.0134					-2.06773	-1.59322		SB07G000980	3587_HOM000505	Adenylate kinase;Adenylate kinase, subfamily; Adenylate kinase, active site lid domain
	Locus_87_Transcript_1_1	40	1	25	6		189.541	14.2095	131.989	34.6462					-3.73758	-1.92965		null		Unavailable
	Locus_8865_Transcript_2_5	29	1	40	15		26.5478	2.74515	40.7984	16.7333					-3.27363	-1.28579		SB04G025770	3587_HOM002173	GrpE nucleotide exchange factor, coiled-coil;GrpE nucleotide exchange factor; GrpE nucleotide exchange factor, head
	Locus_8881_Transcript_2_4	25	33	17	35		19.2829	76.3277	14.6095	32.8973					1.98489	1.17107		ZM04G23840	3587_HOM000143	Aldehyde dehydrogenase, conserved site;Aldehyde dehydrogenase, N-terminal; Aldehyde/histidinol dehydrogenase
	Locus_8881_Transcript_3_4	20	17	22	49		17.1543	43.7249	21.0242	51.2154					1.34989	1.28453		ZM04G23840	3587_HOM000143	Aldehyde dehydrogenase, conserved site;Aldehyde dehydrogenase, N-terminal; Aldehyde/histidinol dehydrogenase
	Locus_8881_Transcript_4_4	23	28	16	38		18.9812	69.2931	14.7119	38.2155					1.86814	1.37717		ZM04G23840	3587_HOM000143	Aldehyde dehydrogenase, conserved site;Aldehyde dehydrogenase, N-terminal; Aldehyde/histidinol dehydrogenase
	Locus_891_Transcript_2_4	160	79	99	163		149.913	221.964	103.349	186.109					0.566203	0.848619		null		Unavailable
	Locus_891_Transcript_3_4	157	80	88	162		147.82	225.872	92.3147	185.871					0.611658	1.00967		null		Unavailable
	Locus_891_Transcript_4_4	147	85	85	132		139.085	241.167	89.6054	152.194					0.794069	0.764251		null		Unavailable
	Locus_8920_Transcript_1_2	185	28	98	38		78.3793	35.5733	46.2604	19.6189					-1.13968	-1.23753		ZM07G06990	3587_HOM000334	Glycogen/starch synthases, ADP-glucose type;Starch synthase, catalytic domain; Glycosyl transferase, group 1
	Locus_8920_Transcript_2_2	165	20	100	44		82.4786	29.9795	55.6943	26.8022					-1.46004	-1.05518		SB02G009870	3587_HOM000334	Glycogen/starch synthases, ADP-glucose type;Starch synthase, catalytic domain; Glycosyl transferase, group 1
	Locus_8992_Transcript_3_10	10	11	9	47		7.46417	24.6213	7.48476	42.7504					1.72185	2.51391		SB06G029550	3587_HOM000069	NAD(P)-binding domain;NAD-dependent epimerase/dehydratase
	Locus_8992_Transcript_7_10	7	13	28	61		5.9598	33.1905	26.561	63.2884					2.47744	1.25263		SB06G029550	3587_HOM000069	NAD(P)-binding domain;NAD-dependent epimerase/dehydratase
	Locus_8992_Transcript_8_10	6	13	28	84		5.15777	33.5113	26.8178	87.9936					2.69983	1.71421		SB06G029550	3587_HOM000069	NAD(P)-binding domain;NAD-dependent epimerase/dehydratase
	Locus_9043_Transcript_5_5	6	12	12	29		5.60809	33.6342	12.4968	33.031					2.58435	1.40227		ZM01G55250	3587_HOM002024	Glycolipid transfer protein, GLTP
	Locus_9057_Transcript_2_2	168	24	108	54		135.172	57.9061	96.8174	52.9457					-1.223	-0.870753		SB04G009380	3587_HOM001790	Rhodanese-like
	Locus_908_Transcript_8_8	24	22	21	39		27.5286	75.6715	26.8377	54.5127					1.45882	1.02233		SB02G019480	3587_HOM000068	Ubiquitin-conjugating enzyme/RWD-like;Ubiquitin-conjugating enzyme, E2
	Locus_910_Transcript_4_4	18	16	34	64		12.6591	33.7434	26.6418	54.8494					1.41443	1.04178		SB06G018810	3587_HOM000943	Glycoside hydrolase-type carbohydrate-binding, subgroup;Aldose 1-epimerase; Aldose-1-epimerase
	Locus_9114_Transcript_1_1	72	74	85	141		49.3166	151.995	64.8684	117.69					1.62388	0.859408		SB01G014730	3587_HOM000290	Protease inhibitor I4, serpin;2) Protease inhibitor I4, serpin, plant
	Locus_9119_Transcript_2_2	263	121	161	198		191.366	264.017	130.523	175.564					0.464295	0.427687		ZM03G21680	3587_HOM001494	Dehydrogenase, multihelical;6-phosphogluconate dehydrogenase, C-terminal-like; NAD(P)-binding domain
	Locus_9133_Transcript_10_12	10	15	35	72		3.11057	13.9916	12.13	27.2919					2.16931	1.16989		SB01G047120	3587_HOM000579	Pheophorbide a oxygenase;Rieske [2Fe-2S] iron-sulphur domain
	Locus_9133_Transcript_12_12	14	22	45	74		4.90509	23.1142	17.5665	31.5945					2.23643	0.846848		SB01G047120	3587_HOM000579	Pheophorbide a oxygenase;Rieske [2Fe-2S] iron-sulphur domain
	Locus_9133_Transcript_9_12	21	22	49	74		8.21943	25.8215	21.3684	35.2952					1.65146	0.723991		SB01G047120	3587_HOM000579	Pheophorbide a oxygenase;Rieske [2Fe-2S] iron-sulphur domain
	Locus_9152_Transcript_1_3	19	16	43	91		24.6	62.121	62.0303	143.577					1.33642	1.21078		SB06G002220	3587_HOM100596	Cystathionine beta-synthase, core
	Locus_9152_Transcript_2_3	25	19	66	104		23.124	52.7004	68.0175	117.224					1.18842	0.785293		ZM02G20380	3587_HOM002548	Cystathionine beta-synthase, core
	Locus_919_Transcript_14_17	45	29	47	75		42.7168	82.5507	49.7092	86.7577					0.950478	0.803477		null		Unavailable
	Locus_9190_Transcript_1_2	130	84	129	162		85.111	164.914	94.0991	129.246					0.9543	0.45787		SB10G003810	3587_HOM000019	Serine/threonine-protein kinase-like domain;Protein kinase, ATP binding site; JNK MAP kinase
	Locus_922_Transcript_7_9	7	16	12	38		8.47477	58.088	16.1869	56.0627					2.777	1.79221		SB02G002260	3587_HOM000054	Peptidase S10, serine carboxypeptidase;2) Peptidase S10, serine carboxypeptidase, active site
	Locus_926_Transcript_1_3	50	54	43	75		59.2923	192.026	56.8134	108.38					1.69538	0.931801		SB10G027660	3587_HOM008094	Protein of unknown function wound-induced
	Locus_926_Transcript_2_3	16	23	9	38		23.3281	100.56	14.6203	67.5156					2.10791	2.20725		SB10G027660	3587_HOM008094	Protein of unknown function wound-induced
	Locus_9280_Transcript_1_2	47	5	25	8		33.3998	10.655	19.7943	6.92782					-1.64831	-1.51461		SB09G023840	3587_HOM000079	Zinc finger, C3HC4 RING-type;2) Zinc finger, RING-type
	Locus_9293_Transcript_1_3	25	22	27	52		12.2375	32.2933	14.7255	31.0183					1.39993	1.0748		BD5G08250	3587_HOM000401	Oligopeptide transporter OPT superfamily
	Locus_9326_Transcript_5_8	70	4	28	9		57.5633	9.86381	25.6543	9.01885					-2.54493	-1.50818		SB02G031030	3587_HOM001231	Triosephosphate isomerase, active site;Triosephosphate isomerase; Aldolase-type TIM barrel
	Locus_9329_Transcript_2_2	83	13	269	69		21.0634	9.89304	76.0598	21.3383					-1.09025	-1.83369		ZM10G24190	3587_HOM000334	Carbohydrate binding domain, family 25;Glycogen/starch synthases, ADP-glucose type; Starch synthase, catalytic domain
	Locus_9403_Transcript_5_5	0	6	5	18		0.001	21.1196	6.53914	25.7472					14.3663	1.97724		ZM03G20910	3587_HOM000077	Thioredoxin-like fold;Glutathione S-transferase, C-terminal-like; Glutathione S-transferase/chloride channel, C-terminal
	Locus_9417_Transcript_2_3	226	49	209	127		228.012	148.246	234.935	156.14					-0.621119	-0.589427		ZM05G03340	3587_HOM003832	NADH-quinone oxidoreductase, chain I;Alpha-helical ferredoxin; 4Fe-4S ferredoxin, iron-sulpur binding domain
	Locus_9447_Transcript_1_1	111	19	114	52		111.308	57.134	127.369	63.543					-0.962138	-1.0032		ZM05G33780	3587_HOM003985	DNA-directed RNA polymerase Rpb11, 13-16kDa subunit, conserved site;DNA-directed RNA polymerase, dimerisation; DNA-directed RNA polymerase
	Locus_950_Transcript_1_5	225	35	255	130		143.331	66.8593	180.988	100.916					-1.10015	-0.842738		ZM02G28450	3587_HOM000409	Calreticulin/calnexin;Concanavalin A-like lectin/glucanase, subgroup; Calreticulin/calnexin, P
	Locus_950_Transcript_3_5	232	40	206	120		148.034	76.5371	146.452	93.3076					-0.951702	-0.650363		ZM02G28450	3587_HOM000409	Calreticulin/calnexin;Concanavalin A-like lectin/glucanase, subgroup; Calreticulin/calnexin, P
	Locus_950_Transcript_5_5	235	46	211	144		149.701	87.8722	149.759	111.784					-0.768605	-0.421927		ZM02G28450	3587_HOM000409	Calreticulin/calnexin;Concanavalin A-like lectin/glucanase, subgroup; Calreticulin/calnexin, P
	Locus_952_Transcript_1_1	7	13	9	28		7.82728	43.5906	11.2127	38.1532					2.47744	1.76668		ZM04G10820	3587_HOM006472	Unavailable
	Locus_9539_Transcript_15_16	69	46	14	66		154.309	308.487	34.8838	179.865					0.999388	2.36629		OSINDICA_10G16160	3587_HOM106352	Unavailable
	Locus_9612_Transcript_1_1	1131	156	278	180		756.312	312.824	207.127	146.68					-1.27363	-0.497841		SB05G016740	3587_HOM001494	Dehydrogenase, multihelical;6-phosphogluconate dehydrogenase, C-terminal-like; NAD(P)-binding domain
	Locus_9741_Transcript_2_8	10	14	3	16		6.99456	29.3647	2.33795	13.6377					2.06978	2.54428		SB08G001940	3587_HOM000018	No apical meristem (NAM) protein
	Locus_976_Transcript_1_9	192	34	250	108		85.7106	45.5144	124.345	58.7514					-0.913149	-1.08165		ZM10G06060	3587_HOM000309	ATPase, AAA-2;ATPase, AAA-type, core; Chaperonin clpA/B
	Locus_976_Transcript_7_9	513	88	591	357		147.033	75.634	188.729	124.688					-0.959033	-0.597987		BD4G39880	3587_HOM000309	ATPase, AAA-2;ATPase, AAA-type, core; Chaperonin clpA/B
	Locus_976_Transcript_9_9	539	101	615	375		182.113	102.332	231.516	154.399					-0.83158	-0.584448		ZM10G15640	3587_HOM000309	ATPase, AAA-2;ATPase, AAA-type, core; Chaperonin clpA/B
	Locus_9945_Transcript_1_2	40	93	88	149		48.5289	338.345	118.953	220.286					2.80158	0.888984		SB08G022450	3587_HOM000107	Thaumatin, pathogenesis-related
	Locus_9945_Transcript_2_2	32	112	95	207		38.1034	399.916	126.035	300.362					3.39171	1.25288		SB08G022450	3587_HOM000107	Thaumatin, pathogenesis-related
