# Supplementary material for: Sugarcane transcriptome analysis in response to infection caused by Acidovorax avenae subsp. avenae
Source: PLoS One. 2016 Dec 9;11(12):e0166473. doi: 10.1371/journal.pone.0166473 (PMC5147822; doi:10.1371/journal.pone.0166473)
Supplement: S6 Table — (XLSX) [file pone.0166473.s006.xlsx]

## Sheet: Table S6
	S6 Table. List of differentially expressed genes coding for hormone biosynthesis pathways in sugarcane infected with Aaa.
	ID Reference Transcriptome	Orthologous	Gene model	Description	Log2 Fold Change
	Ethylene biosynthesis
	Locus_22426_Transcript_1_3	SB01G049030	ACS	aminocyclopropane-1-carboxylate oxidase	3.90628	3.12925
	Locus_22426_Transcript_2_3	SB01G049030	ACS	aminocyclopropane-1-carboxylate oxidase	15.2335	14.2969
	Locus_22426_Transcript_3_3	SB01G049030	ACS	aminocyclopropane-1-carboxylate oxidase	14.7781	3.58868
	Locus_3400_Transcript_2_2	SB08G016400	ACS	aminocyclopropane-1-carboxylate oxidase	0.687444	1.73866
	Locus_389_Transcript_1_2	SB03G026000	ACS	aminocyclopropane-1-carboxylate oxidase	4.95	0.857168
	Locus_389_Transcript_2_2	SB03G026000	ACS	aminocyclopropane-1-carboxylate oxidase	5.65044	0.621307
	Locus_4841_Transcript_14_15	ZM10G12580	ACS	aminocyclopropane-1-carboxylate oxidase	2.777	2.17987
	Locus_4841_Transcript_15_15	ZM10G12580	ACS	aminocyclopropane-1-carboxylate oxidase	3.16931	2.21671
	Locus_4841_Transcript_6_15	ZM10G12580	ACS	aminocyclopropane-1-carboxylate oxidase	3.32132	2.9366
	Locus_5375_Transcript_4_5	SB01G030560	ACS	aminocyclopropane-1-carboxylate oxidase	2.39171	2.12925
	Locus_5375_Transcript_5_5	SB01G030560	ACS	aminocyclopropane-1-carboxylate oxidase	3.90628	1.9366
	Ethylene-activated signaling pathway
	Locus_4940_Transcript_13_15	BD2G37800		AP2-like ethylene-responsive transcription factor	1.66681	0.948675
	Jasmonates biosynthesis
	Locus_442_Transcript_12_14	BD1G09260	LOX	Lipoxygenase, plant	1.48307	1.18755
	Locus_442_Transcript_13_14	OSINDICA_03G50910	LOX	Lipoxygenase, plant	1.65867	0.49028
	Locus_442_Transcript_14_14	SB01G011030	LOX	Lipoxygenase, plant	2.04378	0.884135
	Locus_442_Transcript_5_14	OSINDICA_03G47690	LOX	Lipoxygenase, plant	1.40378	1.58868
	Locus_442_Transcript_7_14	OS03G49350	LOX	Lipoxygenase, plant	1.74085	1.07266
