# Supplementary material for: Sugarcane transcriptome analysis in response to infection caused by Acidovorax avenae subsp. avenae
Source: PLoS One. 2016 Dec 9;11(12):e0166473. doi: 10.1371/journal.pone.0166473 (PMC5147822; doi:10.1371/journal.pone.0166473)
Supplement: S7 Table — (XLSX) [file pone.0166473.s007.xlsx]

## Sheet: Table S7
	S7 Table. List of differentially expressed genes coding for members of carbohydrate metabolism in sugarcane infected with Aaa.
	ID Reference Transcriptome	Orthologous	Log2 Fold Change		Gene model	Descriptions
			Replicate 1	Replicate 2
	Galactose metabolism
	Locus_4644_Transcript_5_8	SB05G023750	2.58435	1.37026		Galactose oxidase/kelch, beta-propeller
	Polysaccharide metabolic process
	Locus_44986_Transcript_1_2	ZM01G10690	14.096	13.9668		deoxystreptamine N-acetyl-D-glucosaminyltransferase
	Locus_4372_Transcript_1_4	ZM04G17800	2.52116	0.920152		Beta-1,4-mannosyl-glycoprotein 4-beta-N-acetylglucosaminyltransferase
	Locus_4372_Transcript_2_4	ZM04G17800	2.62388	1.202		Beta-1,4-mannosyl-glycoprotein 4-beta-N-acetylglucosaminyltransferase
	Locus_4372_Transcript_3_4	ZM04G17800	1.88391	0.954161		Beta-1,4-mannosyl-glycoprotein 4-beta-N-acetylglucosaminyltransferase
	Locus_4372_Transcript_4_4	ZM04G17800	2.58435	1.15162		Beta-1,4-mannosyl-glycoprotein 4-beta-N-acetylglucosaminyltransferase
	Locus_1349_Transcript_1_4	SB07G024860	2.16931	2.24472		Acyl carrier protein 3, chloroplastic
	Locus_24021_Transcript_1_1	SB03G045490	3.90628	2.45118		endo-1,3-beta-glucosidase, basic
	Locus_3122_Transcript_1_3	SB10G028580	1.41443	1.71421		Xyloglucan endotransglucosylase/hydrolase protein
	Locus_606_Transcript_10_10	SB02G035460	4.49124	0.516699		Endo-1,3-beta-glucosidase
	Locus_606_Transcript_2_10	SB02G035460	3.93227	0.407674		Endo-1,3-beta-glucosidase
	Locus_3127_Transcript_1_1	SB02G028940	-0.867346	-1.10779		GDP-fucose protein O-fucosyltransferase
	Glycolysis
	Locus_910_Transcript_4_4	SB06G018810	1.41443	1.04178	GALM	Aldose 1-epimerase
	Locus_3170_Transcript_8_10	SB03G003140	1.37023	0.849139	PFK-1	6-phosphofructokinase 1
	Locus_602_Transcript_1_5	ZM08G29620	2.02141	1.15349	Aldolase	Fructose-bisphosphate aldolase (FBA)
	Locus_602_Transcript_2_5	ZM08G29620	1.96692	0.874404	Aldolase	Fructose-bisphosphate aldolase (FBA)
	Locus_602_Transcript_3_5	ZM08G29620	1.78366	1.13503	Aldolase	Fructose-bisphosphate aldolase (FBA)
	Locus_602_Transcript_4_5	ZM08G29620	1.84848	0.999386	Aldolase	Fructose-bisphosphate aldolase (FBA)
	Locus_602_Transcript_5_5	ZM08G29620	2.08151	0.998663	Aldolase	Fructose-bisphosphate aldolase (FBA)
	Locus_1444_Transcript_1_2	SB04G019020	1.26242	0.749584	Aldolase	Fructose-bisphosphate aldolase (FBA)
	Locus_1444_Transcript_2_2	SB04G019020	1.16473	0.711716	Aldolase	Fructose-bisphosphate aldolase (FBA)
	Locus_9326_Transcript_5_8	SB02G031030	-2.54493	-1.50818	TPI	Triosephosphate isomerase
	Locus_643_Transcript_32_33	SB10G029870	0.604046	0.777162	GAPDH	Glyceraldehyde 3-phosphate dehydrogenase
	Locus_315_Transcript_7_10	ZM05G20350	0.949635	0.801673	PGK	Phosphoglycerate kinase
	Locus_4346_Transcript_3_5	ZM10G26440	1.7728	0.591353	PK	Pyruvare kinase
	Locus_5_Transcript_3585_3585	ZM02G34990	-1.2808	-0.39855	PK	Pyruvare kinase
	Locus_2834_Transcript_1_1	SB01G034390	1.18842	2.08861	PDK	Pyruvate dehydrogenase kinase
	Locus_15242_Transcript_1_10	ZM06G23980	-1.13158	-0.521239	PPDK1	Pyruvate, phosphate dikinase 1, chloroplastic
	Locus_15242_Transcript_10_10	ZM06G23980	-1.30677	-0.979156	PPDK1	Pyruvate, phosphate dikinase 1, chloroplastic
	Locus_15242_Transcript_2_10	ZM06G23980	-0.96994	-1.06493	PPDK1	Pyruvate, phosphate dikinase 1, chloroplastic
	Locus_15242_Transcript_4_10	ZM08G16170	-1.04501	-1.40418	PPDK1	Pyruvate, phosphate dikinase 1, chloroplastic
	Locus_15242_Transcript_7_10	ZM08G16170	-1.50311	-1.10522	PPDK1	Pyruvate, phosphate dikinase 1, chloroplastic
	Pyruvate metabolism
	Locus_8881_Transcript_2_4	ZM04G23840	1.98489	1.17107	ALDH	Aldehyde dehydrogenase
	Locus_8881_Transcript_3_4	ZM04G23840	1.34989	1.28453	ALDH	Aldehyde dehydrogenase
	Locus_8881_Transcript_4_4	ZM04G23840	1.86814	1.37717	ALDH	Aldehyde dehydrogenase
	Locus_13998_Transcript_3_6	ZM05G35110	-13.7421	-12.5058	ALDH	Aldehyde dehydrogenase
	Locus_16369_Transcript_1_1	SB03G005240	1.79585	0.988385	PDC2	Pyruvate decarboxylase
	Locus_5135_Transcript_8_11	SB07G023920	-1.223	-0.797821	LDH	Lactate dehydrogenase/glycoside hydrolase, family 4
	Locus_317_Transcript_1_2	SB01G019280	0.659413	0.832572	LDH	Lactate dehydrogenase/glycoside hydrolase, family 4
	Locus_317_Transcript_2_2	SB01G019280	0.587262	0.850446	LDH	Lactate dehydrogenase/glycoside hydrolase, family 4
	Pentose phosphate pathway
	Locus_9612_Transcript_1_1	SB05G016740	-1.27363	-0.497841		6-phosphogluconate dehydrogenase
	Locus_1106_Transcript_2_2	SB03G037040	1.22178	1.26675		6-phosphogluconate dehydrogenase
	Locus_9119_Transcript_2_2	ZM03G21680	0.464295	0.427687		6-phosphogluconate dehydrogenase
	Locus_5884_Transcript_2_2	ZM08G28550	1.12749	0.526903		Transaldolase
	Transport of sugar
	Locus_10238_Transcript_1_3	SB04G008150	-0.827076	-1.06058	INT	Sugar/inositol transporter (INT - Inositol transporter)
	Locus_1878_Transcript_1_7	ZM05G26830	-3.11609	-3.11868	MSSP1	Monosaccharide-sensing protein 3 (Sb01g030430)
	Locus_1878_Transcript_7_7	ZM10G22930	-13.1761	-2.92965	MSSP1	Monosaccharide-sensing protein 3 (Sb01g030430)
	Locus_4263_Transcript_4_6	ZM07G00340	2.13689	1.57671	HEX6	Hexose carrier protein HEX6 (SB02G036310) STP (Sugar transporter protein)
	Locus_4263_Transcript_5_6	ZM07G00340	2.06978	1.82969	HEX6	Hexose carrier protein HEX6 (SB02G036310) STP (Sugar transporter protein)
	Locus_4876_Transcript_1_7	SB01G042690	1.68869	0.88132	HEX6	Hexose carrier protein HEX6 (SB01G042690) STP (Sugar transporter protein)
	Locus_4876_Transcript_3_7	SB01G042690	0.999388	1.01962	HEX6	Hexose carrier protein HEX6 (SB01G042690) STP (Sugar transporter protein)
	Locus_4876_Transcript_4_7	SB01G042690	1.51396	1.3721	HEX6	Hexose carrier protein HEX6 (SB01G042690) STP (Sugar transporter protein)
	Locus_4876_Transcript_5_7	SB01G042690	1.62388	1.43181	HEX6	Hexose carrier protein HEX6 (SB01G042690) STP (Sugar transporter protein)
	Locus_4876_Transcript_6_7	SB01G042690	1.15809	1.21171	HEX6	Hexose carrier protein HEX6 (SB01G042690) STP (Sugar transporter protein)
	Sucrose metabolism
	Locus_10655_Transcript_1_2	ZM05G29860	1.56163	0.893759	cwINV2	sucrose.invertases.cell wall (AT3G52600)
	Locus_5_Transcript_3582_3585	OSINDICA_03G21260	0.342693	0.316142	SUSY4	Sucrose synthase
	Locus_14317_Transcript_1_1	SB09G003460	2.41443	0.899766	SPP	Sucrose phosphatase (SPP)
	Starch metabolism
	Locus_14139_Transcript_1_4	SB01G029400	2.45882	1.43181	PGSIP	Plant glycogenin-like starch initiation protein
	Locus_14139_Transcript_4_4	SB01G029400	1.65835	1.97724	PGSIP	Plant glycogenin-like starch initiation protein
	Locus_9329_Transcript_2_2	ZM10G24190	-1.09025	-1.83369	Starch syntase	Granule-bound starch synthase
	Locus_8920_Transcript_1_2	ZM07G06990	-1.13968	-1.23753	Starch syntase	Granule-bound starch synthase
	Locus_8920_Transcript_2_2	SB02G009870	-1.46004	-1.05518	Starch syntase	Granule-bound starch synthase
	Locus_6378_Transcript_10_11	SB09G029610	-1.87508	-1.33338	APL	Glucose-1-phosphate adenylyltransferase
	Locus_6378_Transcript_11_11	SB09G029610	-2.18118	-1.36174	APL	Glucose-1-phosphate adenylyltransferase
	Locus_6378_Transcript_2_11	SB09G029610	-1.41565	-1.32393	APL	Glucose-1-phosphate adenylyltransferase
	Locus_6378_Transcript_5_11	SB09G029610	-2.14357	-1.60772	APL	Glucose-1-phosphate adenylyltransferase
	Locus_5_Transcript_2520_3585	SB02G032250	1.93227	2.17364	UGP2	UTP--glucose-1-phosphate uridylyltransferase
	Raffinose biosynthesis
	Locus_5411_Transcript_5_12	BD5G13570	2.80674	2.82969	SIP	Raffinose synthase
	Trehalose biosynthesis
	Locus_10023_Transcript_4_5	BD3G35820	0.752748	0.405221	TPP	Trehalose-phosphatase
	Oxidative phosphorylation
	Locus_371_Transcript_1_2	SB03G033090	0.890454	1.23234	NDUFS7	NADH dehydrogenase (ubiquinone) Fe-S protein 7
	Locus_371_Transcript_2_2	ZM08G26720	1.09892	0.843845	NDUFS7	NADH dehydrogenase (ubiquinone) Fe-S protein 7
	Locus_8197_Transcript_1_1	SB06G027410	1.43996	2.79221	AOX	Ubiquinol oxidase
	Locus_33881_Transcript_1_2	SB06G032180	3.90628	3.29917	AOX	Ubiquinol oxidase
	Locus_8166_Transcript_1_3	SB08G003963	-2.04014	-1.05979	QCR6	Ubiquinol-cytochrome c reductase subunit 6
	Locus_6796_Transcript_1_2	SB01G042930	-0.683422	-0.888135	ATP3	F-type H+-transporting ATPase subunit gamma
	Locus_780_Transcript_1_2	SB04G030280	-0.708723	-0.688812	ATP5	F-type H+-transporting ATPase subunit O
	Locus_780_Transcript_2_2	SB04G030280	-0.53296	-0.50412	ATP5	F-type H+-transporting ATPase subunit O
	Locus_5_Transcript_1198_3585	BD2G39690	1.47744	0.954161	ATP6L	ATPase, V0 complex, proteolipid subunit C, eukaryotic
	Locus_1208_Transcript_7_7	SB06G031240	-1.071	-1.05132	V-TYPEATPase	H+-transporting ATPase
	Locus_1350_Transcript_1_3	SB06G030400	1.39794	1.16487	ATP6M	V-type H+-transporting ATPase subunit D
	Locus_12129_Transcript_2_2	SB09G021610	2.11487	1.45118	ppa	Inorganic pyrophosphatase
	Locus_16329_Transcript_1_1	SB04G036230	4.04378	0.72681	ppa	Inorganic pyrophosphatase
	Carbon fixation in photosynthetic organisms
	Locus_3662_Transcript_1_8	BD3G27278	-2.51368	-1.14639	Rubisco	Ribulose bisphosphate carboxylase, large subunit, C-terminal
	Locus_9326_Transcript_5_8	SB02G031030	-2.54493	-1.50818	TPI	Triosephosphate isomerase
	Locus_5_Transcript_1680_3585	ZM01G39770	1.41443	1.84197	TPT	Triose phosphate/phosphate translocator, non-green plastid, chloroplastic
	Photosynthesis
	Locus_4008_Transcript_1_6	SB01G002180	2.09131	1.37436	PetF	Ferredoxin [2Fe-2S]
	Locus_4008_Transcript_2_6	SB01G002180	1.74482	0.95237	PetF	Ferredoxin [2Fe-2S]
	Locus_4008_Transcript_5_6	SB01G002180	1.69983	0.843845	PetF	Ferredoxin [2Fe-2S]
	Locus_4008_Transcript_6_6	SB01G002180	2.16931	0.959322	PetF	Ferredoxin [2Fe-2S]
	Locus_8446_Transcript_1_6	SB01G006100	2.02045	2.04352	PetH	Ferredoxin--NADP+ reductase
	Locus_8446_Transcript_3_6	SB01G006100	1.72874	1.84197	PetH	Ferredoxin--NADP+ reductase
	Locus_8446_Transcript_4_6	SB01G006100	1.91693	1.57505	PetH	Ferredoxin--NADP+ reductase
	Locus_8446_Transcript_5_6	SB01G006100	2.58435	2.29917	PetH	Ferredoxin--NADP+ reductase
	Locus_8446_Transcript_6_6	SB01G006100	1.58435	2.4247	PetH	Ferredoxin--NADP+ reductase
	Glyoxylate metabolism
	Locus_11700_Transcript_1_4	SB06G028990	2.43235	2.29917		(S)-2-hydroxy-acid oxidase (glycolate oxydase)
	Locus_5135_Transcript_7_11	SB07G023920	-1.28355	-0.729577		Malate dehydrogenase
	Locus_1170_Transcript_4_6	SB06G020720	1.36196	1.88824		Malate synthase
