# Supplementary material for: Sugarcane transcriptome analysis in response to infection caused by Acidovorax avenae subsp. avenae
Source: PLoS One. 2016 Dec 9;11(12):e0166473. doi: 10.1371/journal.pone.0166473 (PMC5147822; doi:10.1371/journal.pone.0166473)
Supplement: S8 Table — (XLSX) [file pone.0166473.s008.xlsx]

## Sheet: Table S8
	S8 Table. List of differentially expressed genes for for stress response pathways in sugarcane infected with Aaa.
	ID Reference Transcriptome	Orthologous	TRAPID gene family	Log2 Fold Change		Protein domain annotation
				Replicate 1	Replicate 2
	Phenylalanine ammonia-lyase
	Locus_12912_Transcript_11_14	SB04G026510	3587_HOM000613	3.01062	2.84545	Phenylalanine ammonia-lyase
	Locus_12912_Transcript_13_14	SB04G026510	3587_HOM000613	2.98874	2.40936	Phenylalanine ammonia-lyase
	Locus_12912_Transcript_14_14	SB04G026510	3587_HOM000613	2.64848	2.29917	Phenylalanine ammonia-lyase
	Locus_12912_Transcript_6_14	SB04G026510	3587_HOM000613	2.62874	2.82969	Phenylalanine ammonia-lyase
	Locus_12912_Transcript_7_14	SB04G026510	3587_HOM000613	1.95986	2.31687	Phenylalanine ammonia-lyase
	Locus_12912_Transcript_8_14	SB04G026510	3587_HOM000613	3.54371	2.06785	Phenylalanine ammonia-lyase
	Locus_12912_Transcript_9_14	SB04G026510	3587_HOM000613	2.80674	2.06785	Phenylalanine ammonia-lyase
	Locus_70_Transcript_21_22	SB04G026510	3587_HOM000613	0.812619	0.287039	Phenylalanine ammonia-lyase
	Locus_12912_Transcript_10_14	SB04G026510	3587_HOM000613	2.65835	1.7731	Phenylalanine ammonia-lyase
	Locus_70_Transcript_16_22	OSINDICA_04G35900	3587_HOM000613	1.22178	1.52156	Phenylalanine ammonia-lyase
	Locus_70_Transcript_18_22	SB04G026520	3587_HOM000613	0.790801	1.06366	Phenylalanine ammonia-lyase
	Locus_70_Transcript_20_22	ZM04G19160	3587_HOM000613	2.11657	1.84074	Phenylalanine ammonia-lyase
	Catalase
	Locus_613_Transcript_1_6	SB10G030840	3587_HOM001655	0.517236	0.718386	Catalase-related immune responsive
	Locus_613_Transcript_2_6	SB10G030840	3587_HOM001655	0.847385	0.623607	Catalase-related immune responsive
	Locus_613_Transcript_5_6	SB10G030840	3587_HOM001655	0.516446	0.540779	Catalase-related immune responsive
	Locus_613_Transcript_6_6	SB10G030840	3587_HOM001655	1.03237	0.683349	Catalase-related immune responsive
	Locus_320_Transcript_10_10	ZM04G41390	3587_HOM001655	0.37177	0.79438	Catalase-related immune responsive
	Locus_320_Transcript_7_10	ZM04G41390	3587_HOM001655	0.439011	0.990271	Catalase-related immune responsive
	NADPH oxidase Respiratory burst
	Locus_40216_Transcript_1_1	SB08G017240	3587_HOM000327	4.75428	2.35164	NADPH oxidase Respiratory burst
	Locus_14281_Transcript_1_1	SB08G017240	3587_HOM000327	3.90628	2.29917	NADPH oxidase Respiratory burst
	Locus_4676_Transcript_1_1	ZM10G04920	3587_HOM000327	4.90628	1.71421	NADPH oxidase Respiratory burst
	Locus_51883_Transcript_1_1	ZM10G04920	3587_HOM000327	17.6082	2.21671	NADPH oxidase Respiratory burst
	Resistance (R) genes
	Locus_17329_Transcript_4_5	BD5G15560	3587_HOM000052	3.90628	1.40488	Disease resistance protein RPS2-like isoform X2
	Locus_2232_Transcript_11_11	BD4G03230	3587_HOM000301	0.726369	0.633014	NB-ARC; Leucine-rich repeat; Powdery mildew resistance protein
	PRRs
	Locus_636_Transcript_1_6	SB01G031820	3587_HOM000004	1.58435	0.89006	Brassinosteroid insensitive 1-associated receptor kinase 1 precursor
	Locus_23499_Transcript_1_1	ZM02G42550	3587_HOM000002	3.04378	1.17505	Somatic embryogenesis receptor kinase 1-like
	Locus_5374_Transcript_1_4	ZM09G13860	3587_HOM000699	1.88691	1.47717	Leucine-rich repeat, cysteine-containing subtype
	Locus_5475_Transcript_18_20	ZM03G13790	3587_HOM000002	0.62027	1.04981	Receptor-like protein kinase HAIKU2
	Locus_51589_Transcript_4_6	SB10G022060	3587_HOM000002	2.16931	3.82969	Leucine-rich repeat (LRR) protein
	Locus_51589_Transcript_5_6	SB10G022060	3587_HOM000002	2.80674	3.58868	Leucine-rich repeat (LRR) protein
	Locus_3727_Transcript_1_1	ZM07G23520	3587_HOM000006	2.37285	2.19338	Cysteine-rich receptor-like protein kinase 15
	Locus_30254_Transcript_1_1	ZM07G23550	3587_HOM000006	4.67181	2.71421	Cysteine-rich receptor-like protein kinase 6 isoform X1 [Zea mays] (CRK)
	Locus_15062_Transcript_2_2	OSINDICA_01G54560	3587_HOM000006	2.96286	1.37026	S-domain serine/threonine receptor-like kinases
	Heat shock protein					Leucine-rich repeat (LRR) protein
	Locus_1336_Transcript_1_3	OSINDICA_03G57840	3587_HOM000083	1.94692	2.45118	Heat shock protein 70, conserved site
	Locus_1984_Transcript_3_5	SB07G024945	3587_HOM000109	3.99939	1.37026	Heat shock protein DnaJ
	Locus_26_Transcript_1_5	SB01G013390	3587_HOM000109	0.826551	0.824634	HSP40/DnaJ peptide-binding
	Locus_26_Transcript_2_5	SB01G013390	3587_HOM000109	0.573079	0.345505	HSP40/DnaJ peptide-binding
	Locus_26_Transcript_3_5	SB01G013390	3587_HOM000109	0.731283	0.608082	HSP40/DnaJ peptide-binding
	Locus_26_Transcript_4_5	SB01G013390	3587_HOM000109	0.579189	0.47647	HSP40/DnaJ peptide-binding
	Locus_26_Transcript_5_5	SB01G013390	3587_HOM000109	0.602898	0.567024	HSP40/DnaJ peptide-binding
	Locus_42238_Transcript_2_4	SB09G026410	3587_HOM003148	13.9309	2.12925	Heat shock protein DnaJ
	Locus_42238_Transcript_4_4	SB09G026410	3587_HOM003148	3.39171	1.88824	Heat shock protein DnaJ
	Locus_584_Transcript_3_5	ZM01G49450	3587_HOM000083	-0.951702	-0.870753	Chaperone DnaK; Heat shock protein 70
	Potential SAR mobile signals
	Locus_5455_Transcript_1_2	SB02G009320	3587_HOM001465	2.75428	2.60729	Putative lipid-transfer protein DIR1
	Locus_5455_Transcript_2_2	SB02G009320	3587_HOM001465	2.58435	2.05525	Putative lipid-transfer protein DIR1
	Pathogenesis related (PR) proteins
	Locus_11118_Transcript_3_8	SB09G004650	3587_HOM000012	4.75428	3.45118	Plant peroxidase
	Locus_11118_Transcript_5_8	SB09G004650	3587_HOM000012	2.36196	2.08344	Plant peroxidase
	Locus_11118_Transcript_8_8	SB09G004650	3587_HOM000012	2.43235	3.21671	Plant peroxidase
	Locus_7854_Transcript_10_10	ZM02G09020	3587_HOM000012	1.63015	1.37317	Plant peroxidase
	Locus_7854_Transcript_2_10	ZM02G09020	3587_HOM000012	2.01498	0.892807	Plant peroxidase
	Locus_7854_Transcript_3_10	ZM02G09020	3587_HOM000012	3.49124	2.71421	Plant peroxidase
	Locus_7854_Transcript_6_10	ZM02G09020	3587_HOM000012	1.81023	1.11237	Plant peroxidase
	Locus_7854_Transcript_8_10	ZM02G09020	3587_HOM000012	1.56198	0.936602	Plant peroxidase
	Locus_1843_Transcript_5_13	ZM02G41460	3587_HOM000453	1.58435	2.61467	Plant ascorbate peroxidase
	Locus_1843_Transcript_6_13	ZM02G41460	3587_HOM000453	2.02492	2.17987	Plant ascorbate peroxidase
	Locus_1843_Transcript_9_13	ZM02G41460	3587_HOM000453	1.66681	1.57671	Plant ascorbate peroxidase
	Locus_1843_Transcript_11_13	ZM02G41460	3587_HOM000453	1.43235	1.97724	Plant ascorbate peroxidase
	Locus_1843_Transcript_13_13	ZM02G41460	3587_HOM000453	1.86446	1.61467	Plant ascorbate peroxidase
	Locus_15789_Transcript_1_1	SB01G041760	3587_HOM000012	2.06978	2.33088	Plant peroxidase
	Locus_1843_Transcript_4_13	SB02G044060	3587_HOM000453	1.41443	1.63826	Plant ascorbate peroxidase
	Locus_17872_Transcript_1_1	SB02G042860	3587_HOM000012	3.58435	2.2244	Plant peroxidase
	Locus_13797_Transcript_1_1	ZM04G37190	3587_HOM000012	2.90628	2.82969	Plant peroxidase
	Locus_7854_Transcript_9_10	ZM02G09010	3587_HOM000012	0.949635	0.997144	Plant peroxidase
	Locus_4708_Transcript_3_4	SB09G004660	3587_HOM000012	1.20408	1.25324	Plant peroxidase
	Locus_29010_Transcript_3_3	SB06G033870	3587_HOM000012	4.16931	3.45118	Plant peroxidase
	Locus_1513_Transcript_1_3	SB03G007170	3587_HOM007820	6.10791	3.04679	Proteinase inhibitor I12, Bowman-Birk
	Locus_1513_Transcript_2_3	SB03G007170	3587_HOM007820	16.5055	2.23616	Proteinase inhibitor I12, Bowman-Birk
	Locus_1513_Transcript_3_3	SB03G007170	3587_HOM007820	5.28479	2.97724	Proteinase inhibitor I12, Bowman-Birk
	Locus_153_Transcript_1_3	ZM08G33320	3587_HOM000925	1.25122	1.32189	Proteinase inhibitor I25, cystatin, conserved region
	Locus_153_Transcript_2_3	ZM08G33320	3587_HOM000925	1.39171	1.19964	Proteinase inhibitor I25, cystatin, conserved region
	Locus_153_Transcript_3_3	ZM08G33320	3587_HOM000925	1.30537	1.21364	Proteinase inhibitor I25, cystatin, conserved region
	Locus_1761_Transcript_1_1	ZM02G12360	3587_HOM005803	3.80674	15.282	Proteinase inhibitor I12, Bowman-Birk
	Locus_26446_Transcript_3_5	SB06G016860	3587_HOM000020	0.962862	1.63826	Proteinase inhibitor I9, subtilisin propeptide
	Locus_26446_Transcript_5_5	ZM02G15090	3587_HOM000020	1.13369	1.58868	Proteinase inhibitor I9, subtilisin propeptide
	Locus_3371_Transcript_1_4	SB04G034980	3587_HOM000020	1.09892	1.90685	Proteinase inhibitor I9, subtilisin propeptide
	Locus_3578_Transcript_1_4	SB09G001060	3587_HOM001929	3.78598	3.21671	Proteinase inhibitor I13, potato inhibitor I
	Locus_3578_Transcript_2_4	SB09G001050	3587_HOM001929	3.90628	14.8913	Proteinase inhibitor I13, potato inhibitor I
	Locus_3578_Transcript_3_4	SB09G001050	3587_HOM001929	4.75428	3.45118	Proteinase inhibitor I13, potato inhibitor I
	Locus_3578_Transcript_4_4	SB09G001050	3587_HOM001929	3.75428	2.97055	Proteinase inhibitor I13, potato inhibitor I
	Locus_6144_Transcript_2_3	ZM01G01270	3587_HOM000020	1.13369	2.06785	Proteinase inhibitor I9, subtilisin propeptide
	Locus_8486_Transcript_1_3	SB05G026670	3587_HOM006127	2.58435	1.87648	Proteinase inhibitor I12, Bowman-Birk
	Locus_8486_Transcript_2_3	SB05G026670	3587_HOM006127	2.49124	1.39228	Proteinase inhibitor I12, Bowman-Birk
	Locus_8486_Transcript_3_3	SB05G026670	3587_HOM006127	2.86446	2.8173	Proteinase inhibitor I12, Bowman-Birk
	Locus_7727_Transcript_1_1	SB01G014740	3587_HOM000290	1.5128	0.803019	Protease inhibitor I4, serpin
	Locus_9114_Transcript_1_1	SB01G014730	3587_HOM000290	1.62388	0.859408	Protease inhibitor I4, serpin
	Locus_3538_Transcript_1_1	SB08G022440	3587_HOM000107	7.14507	3.31325	Thaumatin, pathogenesis-related
	Locus_9945_Transcript_1_2	SB08G022450	3587_HOM000107	2.80158	0.888984	Thaumatin, pathogenesis-related
	Locus_9945_Transcript_2_2	SB08G022450	3587_HOM000107	3.39171	1.25288	Thaumatin, pathogenesis-related
	Locus_20280_Transcript_1_1	SB08G022420	3587_HOM000107	5.04378	2.35164	Thaumatin, pathogenesis-related
	Locus_2034_Transcript_1_1	SB02G037350	3587_HOM000107	16.9704	3.58868	Thaumatin, pathogenesis-related
	Locus_1951_Transcript_4_4	SB05G022960	3587_HOM001672	4.39171	1.71421	Pathogenesis-related protein PR
	Locus_2301_Transcript_1_1	SB05G022940	3587_HOM001672	2.58435	2.9366	Pathogenesis-related protein PR
	Locus_2451_Transcript_5_6	SB09G001210	3587_HOM000272	3.25061	0.704362	Basic 30 kDa endochitinase
	Locus_3379_Transcript_2_4	SB05G006880		3.97667	2.3387	Chitinase 2
	Locus_3379_Transcript_3_4	SB05G006880		4.03181	1.51391	Chitinase 2
	Locus_3379_Transcript_4_4	SB05G006880		3.87981	1.24954	Chitinase 2
	Locus_14139_Transcript_1_4	SB01G029400		2.45882	1.43181	Xylanase inhibitor protein 1
	Locus_14139_Transcript_4_4	SB01G029400		1.65835	1.97724	Xylanase inhibitor protein 1
	Locus_1629_Transcript_1_1	SB02G004650		3.71951	2.54151	Xylanase inhibitor protein 1
	Locus_18470_Transcript_2_3	ZM10G27260		1.13689	1.84545	Endoglucanase 10
	Locus_12011_Transcript_1_1	SB04G038510		-0.780831	-1.03694	Callose synthase
