# Supplementary material for: Sugarcane transcriptome analysis in response to infection caused by Acidovorax avenae subsp. avenae
Source: PLoS One. 2016 Dec 9;11(12):e0166473. doi: 10.1371/journal.pone.0166473 (PMC5147822; doi:10.1371/journal.pone.0166473)
Supplement: S9 Table — The GAPDH was used as constitutive gene for normalization of relative expression data. (XLSX) [file pone.0166473.s009.xlsx]

## Sheet: Table S9
	S9 Table List of 20 genes chosen for validation of RNA-seq data. The GAPDH was used as constitutive gene for normalization of relative expression data.
	ID Reference Transcriptome	Orthologous	Log2 Fold Change		Gene	Protein domain annotation	Primer forward	Primer reverse
	Genes validated in two replicas
	Genes related to stress
	Locus_9114_Transcript_1_1	SB01G014730	1.62388	0.859408	SERPIN1	Protease inhibitor I4, serpin, plant	TGTCGCCGTCGGAAAGTAC	TGCTGCCTTTTCCCTGAAGT
	Locus_13797_Transcript_1_1	ZM04G37190	2.90628	2.82969	Peroxidase	Plant peroxidase	CCGCCGCCATGATAAAGA	CCCTACAGTTTGCCCTGATCTG
	Locus_3538_Transcript_1_1	SB08G022440	7.14507	3.31325	Thaumatin	Thaumatin, pathogenesis-related	AATGCCCTGATGCGTACCA	TGGCGCTGCATGAATGG
	Locus_1629_Transcript_1_1	SB02G004650	3.71951	2.54151	Xylanase inhibitor	Xylanase inhibitor protein 1	CCGGTCAACCGCCCTTAT	AGCAGATTATATTCGAGGGACAGATG
	Locus_1951_Transcript_4_4	SB05G022960	4.39171	1.71421	PR-4	Pathogenesis-related protein PR	CGGGCAGGGCTACCAGAT	TGATCAGCAGGCGACGAA
	Locus_15143_Transcript_1_1	SB04G018940	1.45311	0.752178	MACPF	Membrane attack complex component/perforin (MACPF) domain	TCCCCAATACACCGCAAGAC	TGCACTATCCTGACAAAAACATCA
	Locus_33616_Transcript_1_1	SB01G039360	4.48247	2.85171	CRRSP	Cysteine-rich repeat secretory protein	CACCACCGACATGACGAAGA	CACGTATCACATCAAACTATCAAGGA
	Genes that coding to several pathways
	Locus_16329_Transcript_1_1	SB04G036230	4.04378	0.72681	AVP1	Pyrophosphate-energized vacuolar membrane proton pump 1	CGCTCGGCGTCAAGAACT	AACCGGCAATAATCTCCTCAATT
	Locus_19834_Transcript_1_1	SB02G036840	1.05828	1.05525	C2H2-type	Zinc finger, C2H2-like	CGACCATGTCTTTTGCCTTCA	TCATATTTGCATTTGGGCATTG
	Locus_24504_Transcript_1_1	ZM05G22410	1.04669	1.55246	CBS	Cystathionine beta-synthase, core	CATCCTCGAGCTCACCAACAA	GCGACCGTCTTGGAGATGA
	Locus_8197_Transcript_1_1	SB06G027410	1.43996	2.79221	AOX	Alternative oxidase	GCAGCCAAGGCCTCCAA	TCGATCCCCCAGTAGCTGTT
	Locus_7376_Transcript_1_1	SB03G032570	3.65474	1.90454	Phosphoribohydrolase	Riboside 5'-monophosphate phosphoribohydrolase	CGGACGAGCTGGGAGATG	CGTATGCTATGACTCTGGTGCTTT
	Primary carbohydrate metabolism pathways genes
	Locus_5411_Transcript_5_12	BD5G13570	2.80674	2.82969	SIP2	Raffinose synthase	AGCTCTCACCGTCCGATGTAG	CAGTCTCTCCATTCCAATCATCAC
	Locus_14317_Transcript_1_1	SB09G003460	2.41443	0.899766	SPP	Sucrose-6-phosphate phosphohydrolase C-terminal;	GACCTGGGTTGAAGCACACTCT	GCAAGTGACTAATTAACCTACAAGATGAA
	Locus_10655_Transcript_1_2	ZM05G29860	1.56163	0.893759	CWIN2	AtcwINV2 (Arabidopsis thaliana cell wall invertase 2)	TCATGAACGGCGCCTAGAA	TGGCAGCAATCGTTGAAGAG
	Locus_2834_Transcript_1_1	SB01G034390	1.18842	2.08861	PDK	Pyruvate dehydrogenase kinase, mitochondrial ATPase-like	CCTTCACCCAGATGATCAAAATG	GCAATAGCGGGCACAACAT
	Locus_16369_Transcript_1_1	SB03G005240	1.79585	0.988385	PDC	Pyruvate decarboxylase/indolepyruvate decarboxylase	ATTGGAGATGGCAGCTTTCAG	CCCCATCGGAGCATCGT
	Genes encoding for PRRs
	Locus_23499_Transcript_1_1	ZM02G42550	3.04378	1.17505	SERK1	Somatic embryogenesis receptor kinase 1-like	GAGGTTGGAGCTGCAGAAGAA	TTTTGATGTTCCCGAGAGAGGAT
	Locus_51589_Transcript_4_6	SB10G022060	2.16931	3.82969	LRR protein	Leucine-rich repeat (LRR) protein	TGCCGGCCCAGATATCC	GAAGGAACCGGAGAACATGTTG
	Locus_30254_Transcript_1_1	ZM07G23550	4.67181	2.71421	CRK	Cysteine-rich receptor-like protein kinase 6 isoform X1(CRK)	CACTCTCCAGGCCTCGTCTAA	GTCGTGTTGCCTGCTGTGTT
