# Supplementary material for: Sugarcane transcriptome analysis in response to infection caused by Acidovorax avenae subsp. avenae
Source: PLoS One. 2016 Dec 9;11(12):e0166473. doi: 10.1371/journal.pone.0166473 (PMC5147822; doi:10.1371/journal.pone.0166473)
Supplement: S10 Table — (XLSX) [file pone.0166473.s010.xlsx]

## Sheet: Table S10
	Table S10 List of 20 genes chosen for validation of RNA-seq data with the values of the quantitative method ΔΔCt.
	ID Reference Transcriptome	Orthologous	Log2 Fold Change		Gene	Real-time PCR
						Relative expression			Standard deviation			∆ ∆ ct expressão
						Replicate 1	Replicate 2		Replicate 1	Replicate 2		Replicate 1	Replicate 2
	Genes validated in two replicas
	Genes related to stress
	Locus_9114_Transcript_1_1	SB01G014730	1.62388	0.859408	SERPIN1	1.2113	1.48649		0.0584264	0.140035		0.171971	0.571909
	Locus_13797_Transcript_1_1	ZM04G37190	2.90628	2.82969	Peroxidase	1.22831	1.9038		0.0304813	0.211774		0.296675	0.928885
	Locus_3538_Transcript_1_1	SB08G022440	7.14507	3.31325	Thaumatin	2.05376	1.27954		0.113272	0.161123		1.03827	0.355619
	Locus_1629_Transcript_1_1	SB02G004650	3.71951	2.54151	Xylanase inhibitor	2.74904	1.91864		0.190265	0.0360039		1.45893	0.940082
	Locus_1951_Transcript_4_4	SB05G022960	4.39171	1.71421	PR	1.27432	1.50908		0.106855	0.0968924		0.34973	0.593667
	Locus_15143_Transcript_1_1	SB04G018940	1.45311	0.752178	MACPF	1.57989	1.11614		0.111876	0.0540517		0.659825	0.158524
	Locus_33616_Transcript_1_1	SB01G039360	4.48247	2.85171	CRRSP	2.60973	2.12518		0.145149	0.0219953		1.3839	1.08758
	Genes that coding to several pathways
	Locus_16329_Transcript_1_1	SB04G036230	4.04378	0.72681	AVP1	1.1301	1.99217		0.103956	0.124166		0.0427767	0.994338
	Locus_19834_Transcript_1_1	SB02G036840	1.05828	1.05525	C2H2-type	1.36554	1.80987		0.0951148	0.283255		0.449473	0.855883
	Locus_24504_Transcript_1_1	ZM05G22410	1.04669	1.55246	CBS	1.63088	1.40546		0.0238409	0.0712282		0.705647	0.491044
	Locus_8197_Transcript_1_1	SB06G027410	1.43996	2.79221	AOX	1.32706	1.1379		0.0207858	0.171529		0.408236	0.053662
	Locus_7376_Transcript_1_1	SB03G032570	3.65474	1.90454	Phosphoribohydrolase	1.53773	1.41315		0.00780014	0.168401		0.620803	0.498912
	Primary carbohydrate metabolism pathways genes
	Locus_5411_Transcript_5_12	BD5G13570	2.80674	2.82969	SIP2	1.98668	1.19528		0.0713749	0.0403315		0.990362	0.257344
	Locus_14317_Transcript_1_1	SB09G003460	2.41443	0.899766	SPP	1.47446	1.19195		0.0908328	0.00342073		0.560184	0.126907
	Locus_10655_Transcript_1_2	ZM05G29860	1.56163	0.893759	CWIN2	1.88036	1.98812		0.0172623	0.0887967		0.911009	0.991405
	Locus_2834_Transcript_1_1	SB01G034390	1.18842	2.08861	PDK	1.54202	1.20749		0.224458	0.0127999		0.624823	0.272006
	Locus_16369_Transcript_1_1	SB03G005240	1.79585	0.988385	PDC	1.58022	1.62024		0.227745	0.15865		0.660124	0.69621
	Genes encoding for PRRs
	Locus_23499_Transcript_1_1	ZM02G42550	3.04378	1.17505	SERK1	2.02959	1.25514		0.284816	0.167614		1.02119	0.327845
	Locus_51589_Transcript_4_6	SB10G022060	2.16931	3.82969	LRR protein	1.31907	1.55075		0.00632238	0.114457		0.39952	0.632965
	Locus_30254_Transcript_1_1	ZM07G23550	4.67181	2.71421	CRK	1.2664	1.20966		0.1544	0.0412023		0.340737	0.274598
